# Supplementary material for: Protocol for a prospective, observational, longitudinal study in paediatric patients with moderate-to-severe atopic dermatitis (PEDISTAD): study objectives, design and methodology
Source: PubMed Central journal article supplement — BMJ Open. 2020 Mar 23;10(3):e033507. doi: 10.1136/bmjopen-2019-033507 (PMC7202692; doi:10.1136/bmjopen-2019-033507), 2020-03-23
Supplement: bmjopen-2019-033507.draft_revisions.pdf [file bmjopen-2019-033507.draft_revisions.pdf]

# BMJ Open

BMJ Open is committed to open peer review. As part of this commitment we make the peer review history of every article we publish publicly available.

When an article is published we post the peer reviewers' comments and the authors' responses online. We also post the versions of the paper that were used during peer review. These are the versions that the peer review comments apply to.

The versions of the paper that follow are the versions that were submitted during the peer review process. They are not the versions of record or the final published versions. They should not be cited or distributed as the published version of this manuscript.

BMJ Open is an open access journal and the full, final, typeset and author-corrected version of record of the manuscript is available on our site with no access controls, subscription charges or pay-per-view fees (<http://bmjopen.bmj.com>).

If you have any questions on BMJ Open's open peer review process please email [info.bmjopen@bmj.com](mailto:info.bmjopen@bmj.com)

# BMJ Open

## A prospective, observational, longitudinal study in paediatric patients with moderate-to-severe atopic dermatitis (PEDISTAD): study objectives, design and methodology

|                               |                                                                                                                                                                                                                                                                                                                                                                                                                                                                                                                                                                                                           |
|-------------------------------|-----------------------------------------------------------------------------------------------------------------------------------------------------------------------------------------------------------------------------------------------------------------------------------------------------------------------------------------------------------------------------------------------------------------------------------------------------------------------------------------------------------------------------------------------------------------------------------------------------------|
| Journal:                      | <i>BMJ Open</i>                                                                                                                                                                                                                                                                                                                                                                                                                                                                                                                                                                                           |
| Manuscript ID                 | bmjopen-2019-033507                                                                                                                                                                                                                                                                                                                                                                                                                                                                                                                                                                                       |
| Article Type:                 | Protocol                                                                                                                                                                                                                                                                                                                                                                                                                                                                                                                                                                                                  |
| Date Submitted by the Author: | 07-Aug-2019                                                                                                                                                                                                                                                                                                                                                                                                                                                                                                                                                                                               |
| Complete List of Authors:     | Paller, Amy; Northwestern University Feinberg School of Medicine, Department of Dermatology<br>Guttman-Yassky, Emma; Icahn School of Medicine at Mount Sinai, Irvine, Alan; Trinity College Dublin; National Children's Research Centre, Our Lady's Children's Hospital Crumlin<br>Baselga, Eulalia; Hospital de la Santa Creu i Sant Pau, de Bruin-Weller, Marjolein; Universitair Medisch Centrum Utrecht, Dermatology<br>Jayawardena, Shyamalie; Sanofi<br>Zhang, Annie; Sanofi<br>Mina-Osorio, Paola; Regeneron Pharmaceuticals Inc<br>Rizova, Elena; Sanofi Genzyme<br>Ozturk, Zafer; Sanofi Genzyme |
| Keywords:                     | DERMATOLOGY, Paediatric dermatology < DERMATOLOGY, Eczema < DERMATOLOGY, IMMUNOLOGY                                                                                                                                                                                                                                                                                                                                                                                                                                                                                                                       |
|                               |                                                                                                                                                                                                                                                                                                                                                                                                                                                                                                                                                                                                           |

SCHOLARONE™  
Manuscripts

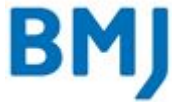

I, the Submitting Author has the right to grant and does grant on behalf of all authors of the Work (as defined in the below author licence), an exclusive licence and/or a non-exclusive licence for contributions from authors who are: i) UK Crown employees; ii) where BMJ has agreed a CC-BY licence shall apply, and/or iii) in accordance with the terms applicable for US Federal Government officers or employees acting as part of their official duties; on a worldwide, perpetual, irrevocable, royalty-free basis to BMJ Publishing Group Ltd ("BMJ") its licensees and where the relevant Journal is co-owned by BMJ to the co-owners of the Journal, to publish the Work in this journal and any other BMJ products and to exploit all rights, as set out in our [licence](#).

The Submitting Author accepts and understands that any supply made under these terms is made by BMJ to the Submitting Author unless you are acting as an employee on behalf of your employer or a postgraduate student of an affiliated institution which is paying any applicable article publishing charge ("APC") for Open Access articles. Where the Submitting Author wishes to make the Work available on an Open Access basis (and intends to pay the relevant APC), the terms of reuse of such Open Access shall be governed by a Creative Commons licence – details of these licences and which [Creative Commons](#) licence will apply to this Work are set out in our licence referred to above.

Other than as permitted in any relevant BMJ Author's Self Archiving Policies, I confirm this Work has not been accepted for publication elsewhere, is not being considered for publication elsewhere and does not duplicate material already published. I confirm all authors consent to publication of this Work and authorise the granting of this licence.

1  
2  
3 **A prospective, observational, longitudinal study in paediatric patients with moderate-to-severe atopic**  
4 **dermatitis (PEDISTAD): study objectives, design and methodology**  
5  
6  
7  
8  
9

10 Amy S Paller,<sup>1</sup> Emma Guttman-Yassky,<sup>2</sup> Alan D Irvine,<sup>3,4</sup> Eulalia Baselga,<sup>5</sup> Marjolein de Bruin-Weller,<sup>6</sup>  
11  
12 Shyamalie Jayawardena,<sup>7</sup> Annie Zhang,<sup>8</sup> Paola Mina-Osorio,<sup>9</sup> Elena Rizova,<sup>8</sup> Zafer E Ozturk<sup>8</sup>  
13  
14  
15

16  
17 **Affiliations**

18  
19 <sup>1</sup>Northwestern University Feinberg School of Medicine, Chicago, IL, USA

20  
21 <sup>2</sup>Icahn School of Medicine at Mount Sinai Medical Center, New York, NY, USA

22  
23 <sup>3</sup>Trinity College Dublin, Dublin, Ireland

24  
25 <sup>4</sup>National Children's Research Centre, Our Lady's Children's Hospital Crumlin, Dublin, Ireland

26  
27 <sup>5</sup>Hospital de la Santa Creu i Sant Pau, Barcelona, Spain

28  
29 <sup>6</sup>University Medical Center Utrecht, Utrecht, Netherlands

30  
31 <sup>7</sup>Sanofi, Bridgewater, NJ, USA

32  
33 <sup>8</sup>Sanofi Genzyme, Cambridge, MA, USA

34  
35 <sup>9</sup>Regeneron Pharmaceuticals, Inc., Tarrytown, NY, USA  
36  
37  
38

39 **Correspondence to**

40  
41 Amy S Paller, MD; Professor and Chair, Department of Dermatology  
42

43 **Address:**

44  
45 Northwestern University Feinberg School of Medicine

46  
47 676 N. St. Clair, Suite 1600

48  
49 Chicago, IL 60611

50  
51 **Telephone:** 001 312-695-3721

52  
53 **E-mail:** [APaller@nm.org](mailto:APaller@nm.org)  
54  
55  
56  
57

**ORCID ID:**

Amy Paller: 0000-0001-6187-6549

Emma Guttman-Yassky: 0000-0002-9363-324X

Alan Irvine: 0000-0002-9048-2044

Eulalia Baselga: 0000-0003-1086-8439

Marjolein de Bruin-Weller: 0000-0002-1249-6993

Paola Mina-Osorio: 0000-0003-2986-9642

**Journal:** BMJ Open

**Article type:** Study protocol

**ClinicalTrials.gov identifier:** NCT03687359

**Manuscript word count:** 1,648 (4,000 word limit, excluding title page, abstract, tables, acknowledgements, contributions and references)

**Abstract word count:** 265 (300 word limit)

**References:** 14

**Figures:** 2

**Tables:** 3

## ABSTRACT

**Introduction:** Atopic dermatitis (AD) is a chronic inflammatory skin disease often associated with atopic comorbidities and has significant impact on children and their families. There is a lack of robust and longitudinal long-term data on disease characteristics and typical clinical practice with currently available treatments in children with moderate-to-severe AD. Hence, an observational study is needed to evaluate AD characteristics and progression in paediatric patients with moderate-to-severe AD.

**Methods and analysis:** Pediatric Study in Atopic Dermatitis (PEDISTAD) is a prospective, observational, longitudinal study in paediatric patients with moderate-to-severe AD who are currently receiving systemic or topical treatment and whose disease is not adequately controlled by topical prescription therapies or for whom those therapies are not medically advisable. 1300 children at 100-150 sites in approximately 20 countries worldwide will be enrolled and followed for 5 years. AD therapy is at the discretion of the investigator. Data collected will include: AD disease characteristics and comorbidities; current therapy for AD and initiation of new treatments/changes in current treatment; patient-/caregiver-reported outcomes; days missed from school/work for the patient/caregiver; healthcare professional visits; safety; and biomarkers.

**Ethics and dissemination:** This study is conducted in accordance with the principles established by the 18th World Medical Assembly and all subsequent amendments and the guidelines for Good Epidemiology Practice. Each individual country assures that ethics approval has been received and local regulatory requirements are met. Study data will be disseminated in manuscripts submitted to peer-reviewed medical journals as well as in abstracts submitted to congresses, and in the resulting posters and presentations.

ClinicalTrials.gov Identifier: NCT03687359.

**Key words:** atopic dermatitis, observational, paediatric, systemic treatment

### Strengths and limitations of this study

- PEDISTAD is a multinational, observational, longitudinal study in a large cohort of paediatric patients with moderate-to-severe atopic dermatitis (AD) that will collect long-term data on patient and disease characteristics, progression of disease, selected atopic comorbidities, real-world treatment patterns, efficacy and safety.
- Previous observational studies in patients with AD have not focused on moderate-to-severe disease leading to a gap in knowledge that will be addressed by this study.
- The observational nature of the study limits the robustness of the collected data compared to that obtained from blinded studies with control groups.
- Challenges of the study include patient recruitment in multiple countries and retention of patients through the observation period of 5 years, both of which can be difficult in young children.

## INTRODUCTION

Atopic dermatitis (AD) is a chronic inflammatory skin disease often associated with atopic comorbidities.[1,2] Due to lack of standardised diagnostic criteria and outcome measures of disease severity, there is variability in the reported prevalence rates of AD in children.

AD profoundly affects the quality of life of children and family members.[3] Itching can affect mood and sleep quality, and the chronic relapsing nature of AD has a detrimental impact on the quality of life of the family.[3] Children with AD may also have symptoms of anxiety and depression.[4]

Limited treatment options are available for children with moderate-to-severe AD and primarily include topical corticosteroids, topical calcineurin inhibitors, topical crisaborole and systemic immunosuppressants.[5-8] Most systemic agents are broadly immunosuppressive, used off-label and are not currently approved for use in children. In general, they do not provide a favourable long-term benefit–risk profile for paediatric patients with AD inadequately controlled by topical therapies. Furthermore, disease can often rebound after cessation of systemic therapy, especially after administration of systemic cyclosporine.[9]

There is a lack of robust and longitudinal long-term data related to disease characteristics and typical clinical practice with currently available treatments in children. Hence, an observational study is necessary to evaluate the characteristics of paediatric patients with moderate-to-severe AD whose disease is not adequately controlled with topical therapies or when those therapies are not medically advisable.

The Pediatric Study in Atopic Dermatitis (PEDISTAD) aims to address the substantial need for a better understanding of AD characteristics and progression, including patient and caregiver burden, in paediatric patients with moderate-to-severe AD who initiate, or are candidates for, systemic therapy. The study will document patient characteristics, patient- and caregiver-reported outcomes, AD progression, and atopic comorbidities and assess the effectiveness and safety of therapies (systemic and



1  
2  
3 topical) while describing real-world treatment patterns over a 5-year period. Here we describe the  
4  
5 objectives, design and endpoints of PEDISTAD.  
6  
7  
8  
9

## 10 **METHODS AND ANALYSIS**

11  
12 PEDISTAD is an international, multicentre, longitudinal, prospective, non-interventional study designed  
13  
14 to describe the disease life course and comorbidities of paediatric patients with moderate-to-severe AD  
15  
16 whose disease is not adequately controlled with topical therapies or for whom those therapies are not  
17  
18 medically advisable (NCT03687359, study OBS15333, protocol version 1, 01 May 2018 and sub-study  
19  
20 LPS15496, protocol version 1, 10 April 2018). Current participating sites are listed in the Clinicaltrials.Gov  
21  
22 record.  
23  
24  
25  
26  
27

### 28 **Patients**

29  
30 This study will enrol a balanced number of patients aged <2 years, ≥2 to <6 years and ≥6 to <12 years at  
31  
32 baseline. Enrolment quotas with respect to treatment types (systemic vs topical) may be imposed to  
33  
34 ensure target numbers of patients in each treatment category. To minimise patient selection bias, all  
35  
36 eligible patients at each selected site should be invited to participate in this registry, until the global  
37  
38 enrolment goal or the site enrolment limit is met.  
39  
40

41 AD therapy prescribed to patients who are enrolled in the study is not dictated per study protocol,  
42  
43 and the therapeutic drug prescription is decided by the medical judgement of the study investigator.  
44  
45 Patients may begin treatment with therapies that become commercially available during the course of  
46  
47 the study.  
48  
49

50 Inclusion and exclusion criteria are reported in table 1. Briefly, patients are eligible for the study if  
51  
52 they are <12 years of age at baseline, have investigator-assessed moderate-to-severe disease and are  
53  
54 either receiving systemic treatment for AD (including UV therapy) or are currently on topical treatment  
55  
56  
57

but would otherwise be candidates for systemic therapy (systemic therapies do not include systemic antihistamines).

**Table 1** Inclusion and exclusion criteria

|                           |                                                                                                                                                                                                                                                                                                                                                                                                                                                                                                                                                                                                                                                                                                                                                                                                                                             |
|---------------------------|---------------------------------------------------------------------------------------------------------------------------------------------------------------------------------------------------------------------------------------------------------------------------------------------------------------------------------------------------------------------------------------------------------------------------------------------------------------------------------------------------------------------------------------------------------------------------------------------------------------------------------------------------------------------------------------------------------------------------------------------------------------------------------------------------------------------------------------------|
| <b>Inclusion criteria</b> | <ul style="list-style-type: none"> <li>• Male or female &lt;12 years of age at baseline</li> <li>• Patients with moderate-to-severe AD according to the investigator's assessment</li> <li>• Treatment               <ul style="list-style-type: none"> <li>- Currently receiving systemic treatment (including UV therapy) for AD or</li> <li>- Currently on topical treatment, but otherwise candidates for systemic treatment due to                   <ul style="list-style-type: none"> <li>▪ Lack of adequate control and/or</li> <li>▪ Safety concern with long-term topical treatment</li> </ul> </li> </ul> </li> <li>• Signed informed consent by the parent/legally acceptable representative and assent by the patient appropriate to the patient's age, including willingness to participate in long-term follow-up</li> </ul> |
| <b>Exclusion criteria</b> | <ul style="list-style-type: none"> <li>• Concurrent participation in an interventional clinical trial that modifies patient care</li> </ul>                                                                                                                                                                                                                                                                                                                                                                                                                                                                                                                                                                                                                                                                                                 |

AD, atopic dermatitis.

## Ethics

This study is being conducted in accordance with the principles established by the 18th World Medical Assembly and all subsequent amendments and in accordance with the guidelines for Good Epidemiology Practice. Each participating country should locally ensure all necessary regulatory submissions (for example, Institutional Review Board/Institutional Ethics Committee) are performed in accordance with local regulations, including local data protection regulations.

### **Patient and public involvement**

Patients and the public were not involved in the design of this study.

### **Study locations and timings**

Approximately 100-150 sites in approximately 20 countries are expected to enrol 1300 patients (figure 1). Patient enrolment is expected to take 2 years, and the study duration for each patient is 5 years. A total of 12 visits are planned for each enrolled patient. The study began on 28 September 2018 and is expected to be completed in September 2025.

### **Study endpoints and data collection**

Data collected will include: demographics; AD disease characteristics at baseline; the presence of selected comorbidities at baseline; time course of conditions including AD; current therapy for AD and initiation of new treatments/changes in current treatment over time; severity of disease at baseline and over the follow-up period; patient-/caregiver-reported outcomes at baseline and over the follow-up period; days missed from school for the patient and days missed from work for the primary caregiver due to AD; visits to healthcare professionals; disease state and evolution of selected atopic comorbid conditions; and photography of a representative area affected by AD at select centres and safety. The association between biomarkers and disease state and time course of AD will be examined by a biomarker sub-study collecting blood samples for analysis of protein and RNA biomarkers and cheek swabs for DNA genomic biomarkers. The data being collected in PEDISTAD are summarised in table 2, and the timings for data collection are shown in figure 2.

**Table 2** Data being collected in PEDISTAD

| <b>Type</b>                                         | <b>Collected data</b>                                                                                                                                                                                                                                                                                                                                                                                                                                                                                                                    |
|-----------------------------------------------------|------------------------------------------------------------------------------------------------------------------------------------------------------------------------------------------------------------------------------------------------------------------------------------------------------------------------------------------------------------------------------------------------------------------------------------------------------------------------------------------------------------------------------------------|
| <b>Patient and disease characteristics</b>          | <ul style="list-style-type: none"> <li>• Patient demographics and medical history</li> <li>• Personal and family history of AD and selected atopic comorbidities</li> <li>• Prior and concomitant medications for AD and comorbidities—all prior systemic therapy ever used, all topical and UV therapy in the previous 3 months as well as treatment(s) for other diseases including name, dose, route, frequency and start/stop date</li> <li>• Selected comorbidity presence throughout the study (as diagnosed by an HCP)</li> </ul> |
| <b>Patient-/caregiver-reported outcomes</b>         | <ul style="list-style-type: none"> <li>• POEM</li> <li>• CDLQI/IDQOL</li> <li>• DFI</li> <li>• Peak Pruritus NRS/Worst scratching NRS</li> <li>• CGAD</li> <li>• Days missed from school for the patient and days missed from work for the primary caregiver due to AD since last visit</li> <li>• TNSS</li> </ul>                                                                                                                                                                                                                       |
| <b>Physician assessments of AD disease activity</b> | <ul style="list-style-type: none"> <li>• EASI</li> <li>• BSA (%) affected by AD</li> </ul>                                                                                                                                                                                                                                                                                                                                                                                                                                               |
| <b>Safety data</b>                                  | <ul style="list-style-type: none"> <li>• All adverse events regardless of seriousness</li> </ul>                                                                                                                                                                                                                                                                                                                                                                                                                                         |
| <b>Other data</b>                                   | <ul style="list-style-type: none"> <li>• Visits to HCPs—type of HCP and reason for the visit</li> <li>• Investigator specialty and setting</li> <li>• Photography of a representative area affected by AD—optional (at select centres)</li> <li>• Reason for end of study</li> </ul>                                                                                                                                                                                                                                                     |
| <b>Biomarker data</b>                               | <ul style="list-style-type: none"> <li>• Serial blood samples for protein and RNA expression</li> <li>• Cheek swabs for DNA genomic biomarkers</li> </ul>                                                                                                                                                                                                                                                                                                                                                                                |

1  
2  
3 AD, atopic dermatitis; BSA, body surface area; CGAD, Caregiver Global Assessment of Disease; CDLQI,  
4 Children's Dermatology Life Quality Index; DFI, Dermatitis Family Impact; EASI, Eczema Area and Severity  
5 Index; HCP, healthcare professional; IDQOL, Infant's Dermatitis Quality of Life; NRS, Numerical Rating  
6 Scale; POEM, Patient-Oriented Eczema Measure; TNSS, Total Nasal Symptom Score.  
7  
8  
9

## 10 11 12 **Dissemination plan**

13  
14 The study team and the study steering and scientific committees are responsible for study reporting and  
15 interpretation, including interim data analyses and sub-group analyses. The data from the PEDISTAD  
16 study will be disseminated in manuscripts for submission to peer-reviewed medical journals as well as in  
17 abstracts for submission to congresses and in the resulting posters and presentations. The final decision  
18 to publish will be made by the study scientific steering committee after prior notice to the sponsor to  
19 allow for its internal review and comments.  
20  
21  
22  
23  
24  
25  
26  
27  
28  
29

## 30 **Statistical analysis**

### 31 **Sample size**

32  
33 To ensure that approximately 930 patients complete the 5-year follow-up, approximately 1300 patients  
34 will be enrolled (about 435 in each age group). A sample of approximately 310 participants per age  
35 group will ensure a maximum width for the confidence interval of 11% for the estimates based on binary  
36 endpoints (table 3). This sample size needed requires that a total of 930 patients complete the study.  
37  
38 The biomarker sub-study will be conducted in approximately 300 participants (100 participants within  
39 each age cohort), whose sample size is based empirically on the results of a previous biomarker study  
40 with similar objectives.[10]  
41  
42  
43  
44  
45  
46  
47  
48  
49  
50  
51  
52  
53  
54  
55  
56  
57  
58  
59  
60

**Table 3** Precision estimates for the overall population

| <b>Width of the 95% CI</b> | <b>Overall population<br/>N=930</b> | <b>33% of overall population<br/>N=310</b> |
|----------------------------|-------------------------------------|--------------------------------------------|
| Binary data–widest width   | 6.4%                                | 11.1%                                      |
| Normal data                | 0.13 SD                             | 0.22 SD                                    |

CI, confidence interval; SD, standard deviation.

### Analysis

All statistical analyses will be performed descriptively with no hypothesis testing. Patient- and care-giver reported outcomes will be summarised within each age cohort, as many are age-based assessments.

Continuous data will be described using summary statistics, including arithmetic mean, standard deviation, median and range, while categorical data will be summarised using counts and percentages.

### DISCUSSION

The PEDISTAD study aims to address the lack of robust and longitudinal long-term data related to AD characteristics, disease progression, development of comorbidities and the typical clinical practice with currently available treatments in children with AD. By collecting information about clinical characteristics, including patient- and care-giver reported outcomes, physician-assessed clinical severity, safety of currently used medicines and photographs of a representative area affected by AD (at select centres), over time, the PEDISTAD study aims to bridge this knowledge gap. A biomarker sub-study of PEDISTAD will analyze the association between biomarkers and disease state and time course of AD in a sub-set of PEDISTAD study participants.

There are various disease trajectories in paediatric patients with AD, and clinical presentation varies with different ages of onset and development of comorbid atopic conditions.[11,12] Patients in this

1  
2  
3 study will, hence, be recruited into 3 age cohorts (<2 years,  $\geq 2$  to <6 years and  $\geq 6$  to <12) and followed  
4  
5 for 5 years.  
6

7 A significant proportion of children have persistent disease;<sup>[12,13]</sup> thus, treatment approaches that  
8  
9 are effective and tolerated over large timespans are desired. The observational and long-term nature of  
10  
11 the PEDISTAD study serves to better understand the long-term evolution of disease burden in patients  
12  
13 and caregivers as well as to identify any unmet therapeutic need for moderate-to-severe AD.  
14  
15

16 Although there are no universal definitions of recalcitrance in AD patients, expert recommendations  
17  
18 mention that failure to respond to adequate topical therapy, a need for prolonged use of high-potency  
19  
20 topical steroids or repeated flares are suggestive of recalcitrance and make a patient eligible for  
21  
22 systemic therapy.<sup>[14]</sup> This observational study will provide insight into the characteristics of paediatric  
23  
24 patients initiated on or who become candidates for systemic therapy to better define when systemic  
25  
26 therapy is warranted.  
27  
28

29  
30 Observational studies in patients with AD to date have been limited by a variety of factors, including  
31  
32 number of participants, participating countries and the extent and duration of data collection. The  
33  
34 PEDISTAD study aims to address all these issues. Furthermore, the PEDISTAD study will be the largest  
35  
36 study to date in a paediatric population with moderate-to-severe AD; by not focusing on  
37  
38 moderate-to-severe disease, other observational studies may have underestimated the risk of  
39  
40 comorbidities and disease persistence in this patient population.  
41  
42

43 Limitations of the PEDISTAD study include the open-label observational nature; thus, the collected  
44  
45 data may not be as robust as blinded studies with control groups. However, the challenges of running  
46  
47 long-term controlled studies, especially in this age group, are well known, and a control group may not  
48  
49 be crucial to fulfil the objectives of this study. Therefore, the data from this study are anticipated to be  
50  
51 highly valuable. Challenges include patient recruitment in multiple countries and sites and retention of  
52  
53 patients in this age group for up to 5 years, which is particularly difficult in very young children. Parental  
54  
55  
56  
57

1  
2  
3 education will be key to keeping patients enrolled in the study and to provide robust and reliable  
4  
5 patient-, caregiver- and physician-reported outcomes at reasonable intervals.  
6

7         In summary, PEDISTAD will improve our understanding of the long-term evolution of AD, disease  
8  
9 burden in patients and caregivers and the impact of therapy on paediatric patients with  
10  
11 moderate-to-severe AD and their families.  
12  
13

14  
15  
16  
17  
18  
19  
20  
21  
22  
23  
24  
25  
26  
27  
28  
29  
30  
31  
32  
33  
34  
35  
36  
37  
38  
39  
40  
41  
42  
43  
44  
45  
46  
47  
48  
49  
50  
51  
52  
53  
54  
55  
56  
57  
58  
59  
60

For peer review only



### Competing interests

**ASP:** AbbVie, AnaptysBio, Eli Lilly, Galderma, Incyte, Janssen, LEO Pharma, Novartis, Regeneron

Pharmaceuticals, Inc., Sanofi – investigator; AbbVie, Amgen, Asana, Dermavant, Dermira, Galderma, Eli Lilly, Forte, LEO Pharma, Matrisys Bioscience, Menlo Therapeutics, Morphosys/Galapagos, Novartis, Pfizer, Regeneron Pharmaceuticals, Inc., Sanofi – consultant.

**EG-Y:** AbbVie, Celgene, Eli Lilly, Galderma, GlaxoSmithKline, Glenmark, LEO Pharma, Pfizer, Regeneron Pharmaceuticals, Inc., Sanofi – investigator; AbbVie, Anacor, Asana Biosciences, Daiichi Sankyo, DBV, Dermira, Eli Lilly, Galderma, GlaxoSmithKline, Glenmark, Kiniksa Pharmaceuticals, Kyowa, LEO Pharma, Menlo Therapeutics, Novartis, Pfizer, Realm, Regeneron Pharmaceuticals, Inc., Sanofi – consultant; AbbVie, Celgene, Dermira, Galderma, Innovaderm, Janssen, LEO Pharma, Novartis, Pfizer, Regeneron Pharmaceuticals, Inc., Sanofi – research grants.

**ADI:** AbbVie, Chugai Pharma, Genentech, Janssen, Novartis, Pfizer, Regeneron Pharmaceuticals, Inc., Sanofi Genzyme – consultant.

**EB:** Almirall – speaker; AbbVie, Eli Lilly, Pfizer – investigator; Pierre Fabre Dermatology – investigator, consultant; Regeneron Pharmaceuticals, Inc., Sanofi Genzyme – consultant; Venthera – co-founder, consultant.

**MdeB-W:** Regeneron Pharmaceuticals, Inc., Sanofi Genzyme – investigator, advisory board member, speaker, consultant; AbbVie, Pfizer – investigator, advisory board member; Eli Lilly, UCB – advisory board member

**SJ, AZ, ER, ZEO:** Sanofi – employees, may hold stock and/or stock options in the company.

**PM-O:** Regeneron Pharmaceuticals, Inc. – employee and shareholder.

1  
2  
3 **Funding** This work was supported by Sanofi and Regeneron Pharmaceuticals, Inc. Medical writing and  
4 editorial assistance was provided by Carolyn Ellenberger, PhD, of Excerpta Medica, funded by Sanofi  
5 Genzyme and Regeneron Pharmaceuticals, Inc. Investigators will collect consent forms and data.  
6  
7 Analysis of the data will be performed by the sponsor. The scientific committee of the study will have  
8 full access to the final data allowing for appropriate analysis and reporting of the study results.  
9  
10  
11  
12  
13  
14  
15

### 16 **Contributors to the protocol**

17  
18 ASP, EG-Y, ADI, EB, MdeB-W were involved in design of the study and are active steering committee  
19 members for the study.  
20  
21

22  
23 SW contributed to the design and development of the protocol and is the statistical lead.  
24

25 PM-O, AZ, ER, ZEO contributed to the design and development of the protocol and are medical leads.  
26  
27  
28  
29  
30  
31  
32  
33  
34  
35  
36  
37  
38  
39  
40  
41  
42  
43  
44  
45  
46  
47  
48  
49  
50  
51  
52  
53  
54  
55  
56  
57  
58  
59  
60

## REFERENCES

1. Shrestha S, Miao R, Wang L, *et al.* Burden of atopic dermatitis in the United States: Analysis of healthcare claims data in the Commercial, Medicare, and Medi-Cal databases. *Adv Ther* 2017;34:1989–2006.
2. Weidinger S, Beck LA, Beiber T, *et al.* Atopic dermatitis. *Nat Rev Dis Primers* 2018;4:1.
3. Ricci G, Bellini F, Dondi A, *et al.* Atopic dermatitis in adolescence. *Dermatol Reports* 2011;4:e1
4. Rønnstad ATM, Halling-Overgaard AS, Hamann CR, *et al.* Association of atopic dermatitis with depression, anxiety, and suicidal ideation in children and adults: A systematic review and meta-analysis. *J Am Acad Dermatol* 2018;79:448–56.
5. Wollenberg A, Oranje A, Deleuran M, *et al.* ETFAD/EADV Eczema task force 2015 position paper on diagnosis and treatment of atopic dermatitis in adult and paediatric patients. *J Eur Acad Dermatol Venereol* 2016;30:729–47.
6. Sidbury R, Tom WL, Bergman JN, *et al.* Guidelines of care for the management of atopic dermatitis: Section 4. Prevention of disease flares and use of adjunctive therapies and approaches. *J Am Acad Dermatol* 2014;71:1218–33.
7. Ring J, Alomar A, Bieber T, *et al.* Guidelines for treatment of atopic eczema (atopic dermatitis) Part II. *J Eur Acad Dermatol Venereol* 2012;26:1176–93.
8. EUCRISA. Highlights of Prescribing Information, FDA 2017.  
[https://www.accessdata.fda.gov/drugsatfda\\_docs/label/2017/207695s002lbl.pdf](https://www.accessdata.fda.gov/drugsatfda_docs/label/2017/207695s002lbl.pdf). (accessed 4 January 2019).
9. Sibbald C, Pope E, Ho N, *et al.* Retrospective review of relapse after systemic cyclosporine in children with atopic dermatitis. *Pediatr Dermatol* 2015;32:36–40.

- 1  
2  
3 10. Thijs JL, Strickland I, Bruijnzeel-Koomen CAFM, *et al*. Moving toward endotypes in atopic  
4 dermatitis: Identification of patient clusters based on serum biomarker analysis. *J Allergy Clin*  
5 *Immunol* 2017;140:730–7.  
6  
7  
8  
9  
10 11. Irvine AD, Mina-Osorio P. Disease trajectories in childhood atopic dermatitis: an update and  
11 practitioner's guide. *Br J Dermatol* doi: 10.1111/bjd.17766. [published Online First 13 February  
12 2019].  
13  
14  
15  
16 12. Paller AS, Spergel JM, Mina-Osorio P, *et al*. The atopic march and atopic multimorbidity: Many  
17 trajectories, many pathways. *J Allergy Clin Immunol* 2019; 143:46–55.  
18  
19  
20  
21 13. Kim JP, Chao LX, Simpson EL, *et al*. Persistence of atopic dermatitis (AD): a systematic review and  
22 meta-analysis. *J Am Acad Dermatol* 2016;75:681–7.  
23  
24  
25  
26 14. Simpson EL, Bruin-Weller M, Flohr C, *et al*. When does atopic dermatitis warrant systemic  
27 therapy? Recommendations from an expert panel of the International Eczema Council. *J Am*  
28 *Acad Dermatol* 2017;77:623–33.  
29  
30  
31  
32  
33  
34  
35  
36  
37  
38  
39  
40  
41  
42  
43  
44  
45  
46  
47  
48  
49  
50  
51  
52  
53  
54  
55  
56  
57  
58  
59  
60

1  
2  
3  
4  
5  
6  
7  
8  
9  
10  
11  
12  
13  
14  
15  
16  
17  
18  
19  
20  
21  
22  
23  
24  
25  
26  
27  
28  
29  
30  
31  
32  
33  
34  
35  
36  
37  
38  
39  
40  
41  
42  
43  
44  
45  
46  
47  
48  
49  
50  
51  
52  
53  
54  
55  
56  
57  
58  
59  
60

**Figure legends**

**Figure 1** Patients and study locations

**Figure 2** Data collection schedule

AD, atopic dermatitis; HCP, healthcare professional.

For peer review only

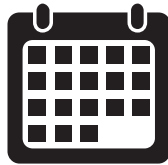

**Total duration:** 5 years

**Enrolment:** 2 years

**Visits:** 12 planned (according to standard of care)

1  
2  
3  
4  
5  
6  
7  
8  
9  
10  
11  
12  
13  
14  
15  
16  
17  
18  
19  
20  
21  
22  
23  
24  
25  
26  
27  
28  
29

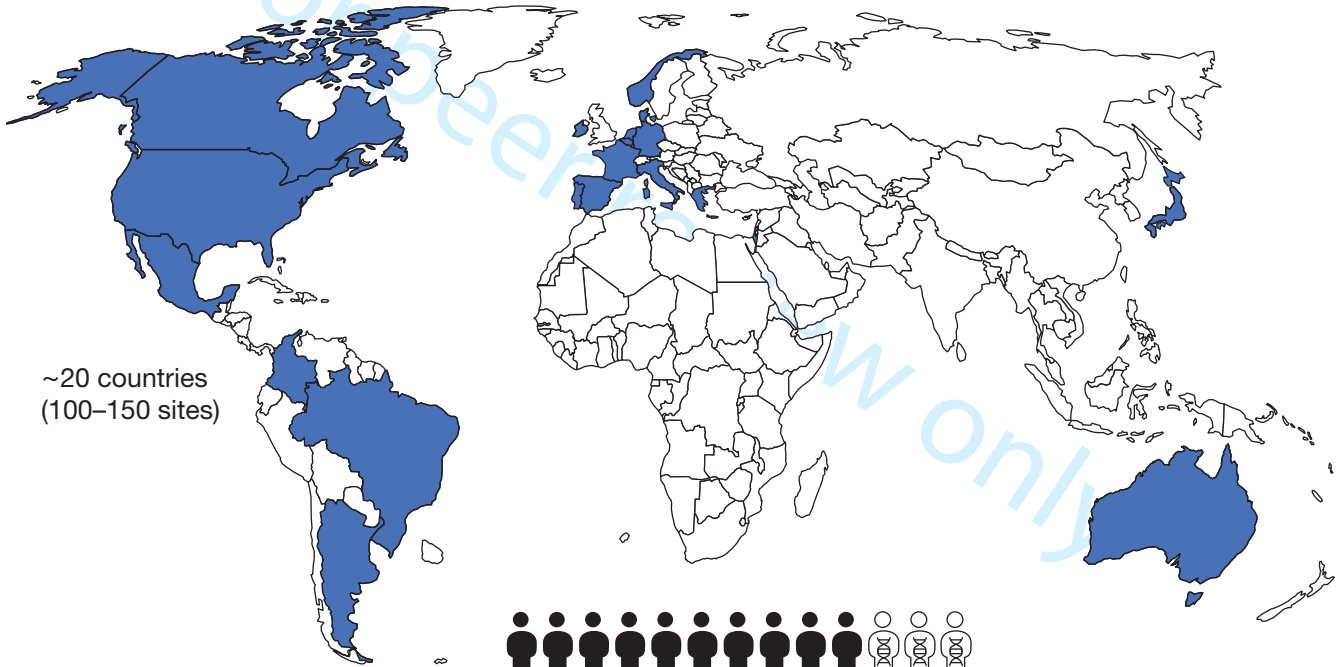

~20 countries  
(100–150 sites)

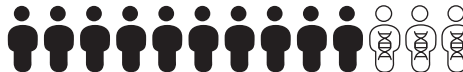

For peer review only - <http://bmjopen.bmj.com/site/about/guidelines.xhtml>  
1,300 patients (300 for biomarker study)

Months 12-54

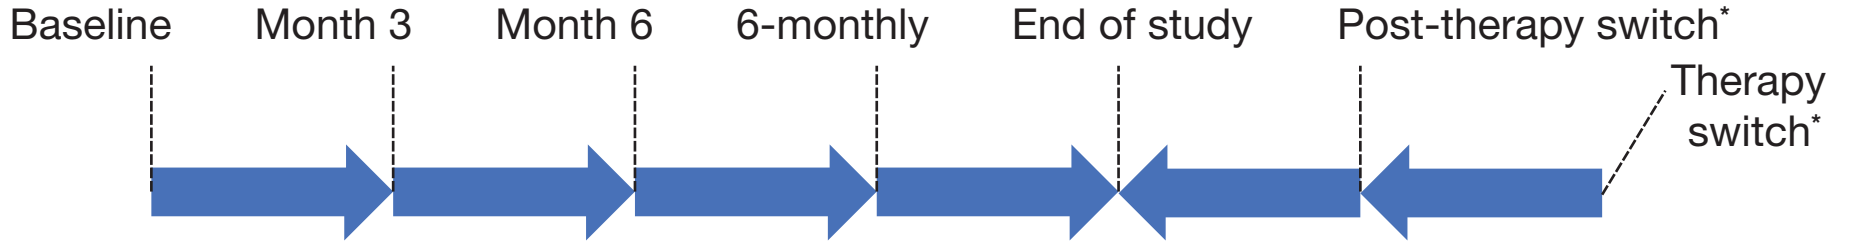

10 Patient and disease characteristics

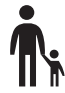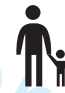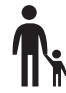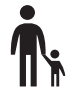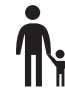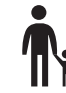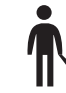

14 Physician assessments of AD activity

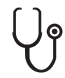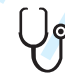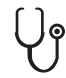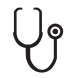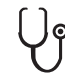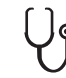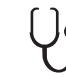

18 Patient/caregiver-reported outcomes

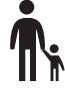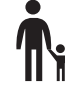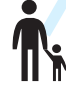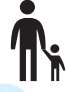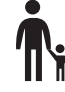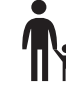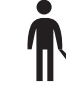

23 Safety

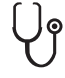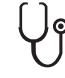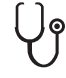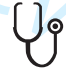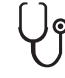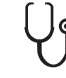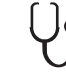

27 HCP visit

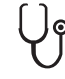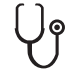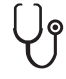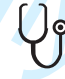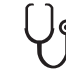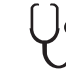

31 Photography (optional)

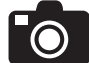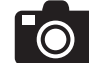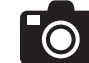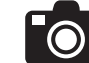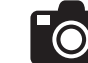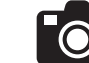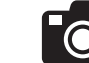

35 Cheek swabs

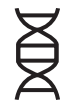

39 Blood samples†

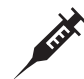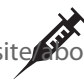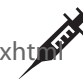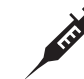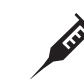

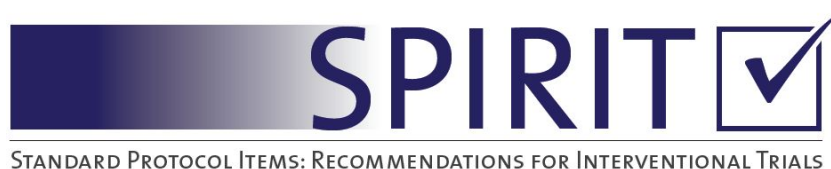

SPIRIT 2013 Checklist: Recommended items to address in a clinical trial protocol and related documents\*

| Section/item                      | ItemNo | Description                                                                                                                                                                                                                                                                              | Page    |
|-----------------------------------|--------|------------------------------------------------------------------------------------------------------------------------------------------------------------------------------------------------------------------------------------------------------------------------------------------|---------|
| <b>Administrative information</b> |        |                                                                                                                                                                                                                                                                                          |         |
| Title                             | 1      | Descriptive title identifying the study design, population, interventions, and, if applicable, trial acronym                                                                                                                                                                             | 1       |
| Trial registration                | 2a     | Trial identifier and registry name. If not yet registered, name of intended registry                                                                                                                                                                                                     | 2, 3, 6 |
|                                   | 2b     | All items from the World Health Organization Trial Registration Data Set                                                                                                                                                                                                                 |         |
| Protocol version                  | 3      | Date and version identifier                                                                                                                                                                                                                                                              | 6       |
| Funding                           | 4      | Sources and types of financial, material, and other support                                                                                                                                                                                                                              | 14–15   |
| Roles and responsibilities        | 5a     | Names, affiliations, and roles of protocol contributors                                                                                                                                                                                                                                  | 1, 15   |
|                                   | 5b     | Name and contact information for the trial sponsor                                                                                                                                                                                                                                       | 1, 14   |
|                                   | 5c     | Role of study sponsor and funders, if any, in study design; collection, management, analysis, and interpretation of data; writing of the report; and the decision to submit the report for publication, including whether they will have ultimate authority over any of these activities | 14–15   |
|                                   | 5d     | Composition, roles, and responsibilities of the coordinating centre, steering committee, endpoint adjudication committee, data management team, and other individuals or groups overseeing the trial, if applicable (see Item 21a for data monitoring committee)                         | 10, 15  |
| <b>Introduction</b>               |        |                                                                                                                                                                                                                                                                                          |         |
| Background and rationale          | 6a     | Description of research question and justification for undertaking the trial, including summary of relevant studies (published and unpublished) examining benefits and harms for each intervention                                                                                       | 5–6     |
|                                   | 6b     | Explanation for choice of comparators                                                                                                                                                                                                                                                    | N/A     |



|    |                                                           |     |                                                            |               |
|----|-----------------------------------------------------------|-----|------------------------------------------------------------|---------------|
| 1  |                                                           |     |                                                            |               |
| 2  | Objectives                                                | 7   | Specific objectives or hypotheses                          | 5–6           |
| 3  |                                                           |     |                                                            |               |
| 4  | Trial design                                              | 8   | Description of trial design including type of trial (eg,   | 6             |
| 5  |                                                           |     | parallel group, crossover, factorial, single group),       |               |
| 6  |                                                           |     | allocation ratio, and framework (eg, superiority,          |               |
| 7  |                                                           |     | equivalence, noninferiority, exploratory)                  |               |
| 8  |                                                           |     |                                                            |               |
| 9  |                                                           |     |                                                            |               |
| 10 | <b>Methods: Participants, interventions, and outcomes</b> |     |                                                            |               |
| 11 |                                                           |     |                                                            |               |
| 12 | Study setting                                             | 9   | Description of study settings (eg, community clinic,       | 6, figure 1   |
| 13 |                                                           |     | academic hospital) and list of countries where data will   |               |
| 14 |                                                           |     | be collected. Reference to where list of study sites can   |               |
| 15 |                                                           |     | be obtained                                                |               |
| 16 |                                                           |     |                                                            |               |
| 17 | Eligibility criteria                                      | 10  | Inclusion and exclusion criteria for participants. If      | 6–7, table 1  |
| 18 |                                                           |     | applicable, eligibility criteria for study centres and     |               |
| 19 |                                                           |     | individuals who will perform the interventions (eg,        |               |
| 20 |                                                           |     | surgeons, psychotherapists)                                |               |
| 21 |                                                           |     |                                                            |               |
| 22 |                                                           |     |                                                            |               |
| 23 | Interventions                                             | 11a | Interventions for each group with sufficient detail to     | N/A,          |
| 24 |                                                           |     | allow replication, including how and when they will be     | observational |
| 25 |                                                           |     | administered                                               |               |
| 26 |                                                           |     |                                                            |               |
| 27 |                                                           |     |                                                            |               |
| 28 |                                                           | 11b | Criteria for discontinuing or modifying allocated          | 6             |
| 29 |                                                           |     | interventions for a given trial participant (eg, drug dose |               |
| 30 |                                                           |     | change in response to harms, participant request, or       |               |
| 31 |                                                           |     | improving/worsening disease)                               |               |
| 32 |                                                           |     |                                                            |               |
| 33 |                                                           |     |                                                            |               |
| 34 |                                                           | 11c | Strategies to improve adherence to intervention            | N/A,          |
| 35 |                                                           |     | protocols, and any procedures for monitoring               | observational |
| 36 |                                                           |     | adherence (eg, drug tablet return, laboratory tests)       |               |
| 37 |                                                           |     |                                                            |               |
| 38 |                                                           | 11d | Relevant concomitant care and interventions that are       | N/A,          |
| 39 |                                                           |     | permitted or prohibited during the trial                   | observational |
| 40 |                                                           |     |                                                            |               |
| 41 | Outcomes                                                  | 12  | Primary, secondary, and other outcomes, including the      | Page 8-9,     |
| 42 |                                                           |     | specific measurement variable (eg, systolic blood          | table 2       |
| 43 |                                                           |     | pressure), analysis metric (eg, change from baseline,      |               |
| 44 |                                                           |     | final value, time to event), method of aggregation (eg,    |               |
| 45 |                                                           |     | median, proportion), and time point for each outcome.      |               |
| 46 |                                                           |     | Explanation of the clinical relevance of chosen efficacy   |               |
| 47 |                                                           |     | and harm outcomes is strongly recommended                  |               |
| 48 |                                                           |     |                                                            |               |
| 49 |                                                           |     |                                                            |               |
| 50 | Participant                                               | 13  | Time schedule of enrolment, interventions (including       | 8, figure 2   |
| 51 | timeline                                                  |     | any run-ins and washouts), assessments, and visits for     |               |
| 52 |                                                           |     | participants. A schematic diagram is highly                |               |
| 53 |                                                           |     | recommended (see Figure)                                   |               |
| 54 |                                                           |     |                                                            |               |
| 55 |                                                           |     |                                                            |               |
| 56 |                                                           |     |                                                            |               |
| 57 |                                                           |     |                                                            |               |
| 58 |                                                           |     |                                                            |               |
| 59 |                                                           |     |                                                            |               |
| 60 |                                                           |     |                                                            |               |

|   |             |    |                                                         |              |
|---|-------------|----|---------------------------------------------------------|--------------|
| 1 |             |    |                                                         |              |
| 2 | Sample size | 14 | Estimated number of participants needed to achieve      | 10–11, table |
| 3 |             |    | study objectives and how it was determined, including   | 3            |
| 4 |             |    | clinical and statistical assumptions supporting any     |              |
| 5 |             |    | sample size calculations                                |              |
| 6 |             |    |                                                         |              |
| 7 | Recruitment | 15 | Strategies for achieving adequate participant enrolment | N/A          |
| 8 |             |    | to reach target sample size                             |              |
| 9 |             |    |                                                         |              |

### Methods: Assignment of interventions (for controlled trials)

#### Allocation:

|    |                |     |                                                           |               |
|----|----------------|-----|-----------------------------------------------------------|---------------|
| 14 | Sequence       | 16a | Method of generating the allocation sequence (eg,         | N/A,          |
| 15 | generation     |     | computer-generated random numbers), and list of any       | observational |
| 16 |                |     | factors for stratification. To reduce predictability of a |               |
| 17 |                |     | random sequence, details of any planned restriction       |               |
| 18 |                |     | (eg, blocking) should be provided in a separate           |               |
| 19 |                |     | document that is unavailable to those who enrol           |               |
| 20 |                |     | participants or assign interventions                      |               |
| 21 |                |     |                                                           |               |
| 22 |                |     |                                                           |               |
| 23 |                |     |                                                           |               |
| 24 | Allocation     | 16b | Mechanism of implementing the allocation sequence         | N/A,          |
| 25 | concealment    |     | (eg, central telephone; sequentially numbered, opaque,    | observational |
| 26 | mechanism      |     | sealed envelopes), describing any steps to conceal the    |               |
| 27 |                |     | sequence until interventions are assigned                 |               |
| 28 |                |     |                                                           |               |
| 29 |                |     |                                                           |               |
| 30 | Implementation | 16c | Who will generate the allocation sequence, who will       | N/A,          |
| 31 |                |     | enrol participants, and who will assign participants to   | observational |
| 32 |                |     | interventions                                             |               |
| 33 |                |     |                                                           |               |
| 34 | Blinding       | 17a | Who will be blinded after assignment to interventions     | N/A,          |
| 35 | (masking)      |     | (eg, trial participants, care providers, outcome          | observational |
| 36 |                |     | assessors, data analysts), and how                        |               |
| 37 |                |     |                                                           |               |
| 38 |                |     |                                                           |               |
| 39 |                | 17b | If blinded, circumstances under which unblinding is       | N/A,          |
| 40 |                |     | permissible, and procedure for revealing a participant's  | observational |
| 41 |                |     | allocated intervention during the trial                   |               |
| 42 |                |     |                                                           |               |

### Methods: Data collection, management, and analysis

|    |                 |     |                                                             |       |
|----|-----------------|-----|-------------------------------------------------------------|-------|
| 45 | Data collection | 18a | Plans for assessment and collection of outcome,             | 8, 10 |
| 46 | methods         |     | baseline, and other trial data, including any related       |       |
| 47 |                 |     | processes to promote data quality (eg, duplicate            |       |
| 48 |                 |     | measurements, training of assessors) and a description      |       |
| 49 |                 |     | of study instruments (eg, questionnaires, laboratory        |       |
| 50 |                 |     | tests) along with their reliability and validity, if known. |       |
| 51 |                 |     | Reference to where data collection forms can be found,      |       |
| 52 |                 |     | if not in the protocol                                      |       |
| 53 |                 |     |                                                             |       |
| 54 |                 |     |                                                             |       |
| 55 |                 |     |                                                             |       |
| 56 |                 | 18b | Plans to promote participant retention and complete         | N/A   |
| 57 |                 |     | follow-up, including list of any outcome data to be         |       |
| 58 |                 |     | collected for participants who discontinue or deviate       |       |
| 59 |                 |     | from intervention protocols                                 |       |
| 60 |                 |     |                                                             |       |

|    |                                 |     |                                                              |               |
|----|---------------------------------|-----|--------------------------------------------------------------|---------------|
| 1  |                                 |     |                                                              |               |
| 2  | Data                            | 19  | Plans for data entry, coding, security, and storage,         | N/A           |
| 3  | management                      |     | including any related processes to promote data quality      |               |
| 4  |                                 |     | (eg, double data entry; range checks for data values).       |               |
| 5  |                                 |     | Reference to where details of data management                |               |
| 6  |                                 |     | procedures can be found, if not in the protocol              |               |
| 7  |                                 |     |                                                              |               |
| 8  | Statistical                     | 20a | Statistical methods for analysing primary and                | 10            |
| 9  | methods                         |     | secondary outcomes. Reference to where other details         |               |
| 10 |                                 |     | of the statistical analysis plan can be found, if not in the |               |
| 11 |                                 |     | protocol                                                     |               |
| 12 |                                 |     |                                                              |               |
| 13 |                                 |     |                                                              |               |
| 14 |                                 | 20b | Methods for any additional analyses (eg, subgroup and        | N/A           |
| 15 |                                 |     | adjusted analyses)                                           |               |
| 16 |                                 |     |                                                              |               |
| 17 |                                 |     |                                                              |               |
| 18 |                                 | 20c | Definition of analysis population relating to protocol       | N/A,          |
| 19 |                                 |     | non-adherence (eg, as randomised analysis), and any          | observational |
| 20 |                                 |     | statistical methods to handle missing data (eg, multiple     |               |
| 21 |                                 |     | imputation)                                                  |               |
| 22 |                                 |     |                                                              |               |
| 23 | <b>Methods: Monitoring</b>      |     |                                                              |               |
| 24 |                                 |     |                                                              |               |
| 25 | Data monitoring                 | 21a | Composition of data monitoring committee (DMC);              | N/A           |
| 26 |                                 |     | summary of its role and reporting structure; statement       |               |
| 27 |                                 |     | of whether it is independent from the sponsor and            |               |
| 28 |                                 |     | competing interests; and reference to where further          |               |
| 29 |                                 |     | details about its charter can be found, if not in the        |               |
| 30 |                                 |     | protocol. Alternatively, an explanation of why a DMC is      |               |
| 31 |                                 |     | not needed                                                   |               |
| 32 |                                 |     |                                                              |               |
| 33 |                                 |     |                                                              |               |
| 34 |                                 |     |                                                              |               |
| 35 |                                 | 21b | Description of any interim analyses and stopping             | N/A,          |
| 36 |                                 |     | guidelines, including who will have access to these          | observational |
| 37 |                                 |     | interim results and make the final decision to terminate     |               |
| 38 |                                 |     | the trial                                                    |               |
| 39 |                                 |     |                                                              |               |
| 40 | Harms                           | 22  | Plans for collecting, assessing, reporting, and              | N/A,          |
| 41 |                                 |     | managing solicited and spontaneously reported                | observational |
| 42 |                                 |     | adverse events and other unintended effects of trial         |               |
| 43 |                                 |     | interventions or trial conduct                               |               |
| 44 |                                 |     |                                                              |               |
| 45 |                                 |     |                                                              |               |
| 46 | Auditing                        | 23  | Frequency and procedures for auditing trial conduct, if      | N/A           |
| 47 |                                 |     | any, and whether the process will be independent from        |               |
| 48 |                                 |     | investigators and the sponsor                                |               |
| 49 |                                 |     |                                                              |               |
| 50 |                                 |     |                                                              |               |
| 51 | <b>Ethics and dissemination</b> |     |                                                              |               |
| 52 |                                 |     |                                                              |               |
| 53 | Research ethics                 | 24  | Plans for seeking research ethics                            | 7             |
| 54 | approval                        |     | committee/institutional review board (REC/IRB)               |               |
| 55 |                                 |     | approval                                                     |               |
| 56 |                                 |     |                                                              |               |
| 57 |                                 |     |                                                              |               |
| 58 |                                 |     |                                                              |               |
| 59 |                                 |     |                                                              |               |
| 60 |                                 |     |                                                              |               |

|    |                   |     |                                                            |               |
|----|-------------------|-----|------------------------------------------------------------|---------------|
| 1  |                   |     |                                                            |               |
| 2  | Protocol          | 25  | Plans for communicating important protocol                 | N/A           |
| 3  | amendments        |     | modifications (eg, changes to eligibility criteria,        |               |
| 4  |                   |     | outcomes, analyses) to relevant parties (eg,               |               |
| 5  |                   |     | investigators, REC/IRBs, trial participants, trial         |               |
| 6  |                   |     | registries, journals, regulators)                          |               |
| 7  |                   |     |                                                            |               |
| 8  | Consent or assent | 26a | Who will obtain informed consent or assent from            | N/A           |
| 9  |                   |     | potential trial participants or authorised surrogates, and |               |
| 10 |                   |     | how (see Item 32)                                          |               |
| 11 |                   |     |                                                            |               |
| 12 |                   |     |                                                            |               |
| 13 |                   | 26b | Additional consent provisions for collection and use of    | N/A           |
| 14 |                   |     | participant data and biological specimens in ancillary     |               |
| 15 |                   |     | studies, if applicable                                     |               |
| 16 |                   |     |                                                            |               |
| 17 | Confidentiality   | 27  | How personal information about potential and enrolled      | N/A           |
| 18 |                   |     | participants will be collected, shared, and maintained in  |               |
| 19 |                   |     | order to protect confidentiality before, during, and after |               |
| 20 |                   |     | the trial                                                  |               |
| 21 |                   |     |                                                            |               |
| 22 |                   |     |                                                            |               |
| 23 | Declaration of    | 28  | Financial and other competing interests for principal      | 14–15         |
| 24 | interests         |     | investigators for the overall trial and each study site    |               |
| 25 |                   |     |                                                            |               |
| 26 | Access to data    | 29  | Statement of who will have access to the final trial       | N/A           |
| 27 |                   |     | dataset, and disclosure of contractual agreements that     |               |
| 28 |                   |     | limit such access for investigators                        |               |
| 29 |                   |     |                                                            |               |
| 30 |                   |     |                                                            |               |
| 31 | Ancillary and     | 30  | Provisions, if any, for ancillary and post-trial care, and | N/A,          |
| 32 | post-trial care   |     | for compensation to those who suffer harm from trial       | observational |
| 33 |                   |     | participation                                              |               |
| 34 |                   |     |                                                            |               |
| 35 | Dissemination     | 31a | Plans for investigators and sponsor to communicate         | 10            |
| 36 | policy            |     | trial results to participants, healthcare professionals,   |               |
| 37 |                   |     | the public, and other relevant groups (eg, via             |               |
| 38 |                   |     | publication, reporting in results databases, or other      |               |
| 39 |                   |     | data sharing arrangements), including any publication      |               |
| 40 |                   |     | restrictions                                               |               |
| 41 |                   |     |                                                            |               |
| 42 |                   |     |                                                            |               |
| 43 |                   |     |                                                            |               |
| 44 |                   | 31b | Authorship eligibility guidelines and any intended use of  |               |
| 45 |                   |     | professional writers                                       |               |
| 46 |                   |     |                                                            |               |
| 47 |                   | 31c | Plans, if any, for granting public access to the full      | N/A           |
| 48 |                   |     | protocol, participant-level dataset, and statistical code  |               |
| 49 |                   |     |                                                            |               |
| 50 |                   |     |                                                            |               |
| 51 | <b>Appendices</b> |     |                                                            |               |
| 52 | Informed consent  | 32  | Model consent form and other related documentation         | N/A           |
| 53 | materials         |     | given to participants and authorised surrogates            |               |
| 54 |                   |     |                                                            |               |
| 55 | Biological        | 33  | Plans for collection, laboratory evaluation, and storage   | N/A           |
| 56 | specimens         |     | of biological specimens for genetic or molecular           |               |
| 57 |                   |     | analysis in the current trial and for future use in        |               |
| 58 |                   |     | ancillary studies, if applicable                           |               |
| 59 |                   |     |                                                            |               |
| 60 |                   |     |                                                            |               |

1 \*It is strongly recommended that this checklist be read in conjunction with the SPIRIT 2013  
2 Explanation & Elaboration for important clarification on the items. Amendments to the  
3 protocol should be tracked and dated. The SPIRIT checklist is copyrighted by the SPIRIT  
4 Group under the Creative Commons "[Attribution-NonCommercial-NoDerivs 3.0 Unported](#)"  
5 license.  
6  
7  
8  
9  
10  
11  
12  
13  
14  
15  
16  
17  
18  
19  
20  
21  
22  
23  
24  
25  
26  
27  
28  
29  
30  
31  
32  
33  
34  
35  
36  
37  
38  
39  
40  
41  
42  
43  
44  
45  
46  
47  
48  
49  
50  
51  
52  
53  
54  
55  
56  
57  
58  
59  
60

For peer review only

# BMJ Open

## A prospective, observational, longitudinal study in paediatric patients with moderate-to-severe atopic dermatitis (PEDISTAD): study objectives, design and methodology

|                                 |                                                                                                                                                                                                                                                                                                                                                                                                                                                                                                                                                                                                           |
|---------------------------------|-----------------------------------------------------------------------------------------------------------------------------------------------------------------------------------------------------------------------------------------------------------------------------------------------------------------------------------------------------------------------------------------------------------------------------------------------------------------------------------------------------------------------------------------------------------------------------------------------------------|
| Journal:                        | <i>BMJ Open</i>                                                                                                                                                                                                                                                                                                                                                                                                                                                                                                                                                                                           |
| Manuscript ID                   | bmjopen-2019-033507.R1                                                                                                                                                                                                                                                                                                                                                                                                                                                                                                                                                                                    |
| Article Type:                   | Protocol                                                                                                                                                                                                                                                                                                                                                                                                                                                                                                                                                                                                  |
| Date Submitted by the Author:   | 04-Nov-2019                                                                                                                                                                                                                                                                                                                                                                                                                                                                                                                                                                                               |
| Complete List of Authors:       | Paller, Amy; Northwestern University Feinberg School of Medicine, Department of Dermatology<br>Guttman-Yassky, Emma; Icahn School of Medicine at Mount Sinai, Irvine, Alan; Trinity College Dublin; National Children's Research Centre, Our Lady's Children's Hospital Crumlin<br>Baselga, Eulalia; Hospital de la Santa Creu i Sant Pau, de Bruin-Weller, Marjolein; Universitair Medisch Centrum Utrecht, Dermatology<br>Jayawardena, Shyamalie; Sanofi<br>Zhang, Annie; Sanofi<br>Mina-Osorio, Paola; Regeneron Pharmaceuticals Inc<br>Rizova, Elena; Sanofi Genzyme<br>Ozturk, Zafer; Sanofi Genzyme |
| <b>Primary Subject Heading</b>: | Dermatology                                                                                                                                                                                                                                                                                                                                                                                                                                                                                                                                                                                               |
| Secondary Subject Heading:      | Immunology (including allergy), Paediatrics                                                                                                                                                                                                                                                                                                                                                                                                                                                                                                                                                               |
| Keywords:                       | DERMATOLOGY, Paediatric dermatology < DERMATOLOGY, Eczema < DERMATOLOGY, IMMUNOLOGY                                                                                                                                                                                                                                                                                                                                                                                                                                                                                                                       |
|                                 |                                                                                                                                                                                                                                                                                                                                                                                                                                                                                                                                                                                                           |

SCHOLARONE™  
Manuscripts

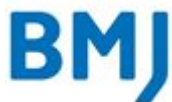

I, the Submitting Author has the right to grant and does grant on behalf of all authors of the Work (as defined in the below author licence), an exclusive licence and/or a non-exclusive licence for contributions from authors who are: i) UK Crown employees; ii) where BMJ has agreed a CC-BY licence shall apply, and/or iii) in accordance with the terms applicable for US Federal Government officers or employees acting as part of their official duties; on a worldwide, perpetual, irrevocable, royalty-free basis to BMJ Publishing Group Ltd ("BMJ") its licensees and where the relevant Journal is co-owned by BMJ to the co-owners of the Journal, to publish the Work in this journal and any other BMJ products and to exploit all rights, as set out in our [licence](#).

The Submitting Author accepts and understands that any supply made under these terms is made by BMJ to the Submitting Author unless you are acting as an employee on behalf of your employer or a postgraduate student of an affiliated institution which is paying any applicable article publishing charge ("APC") for Open Access articles. Where the Submitting Author wishes to make the Work available on an Open Access basis (and intends to pay the relevant APC), the terms of reuse of such Open Access shall be governed by a Creative Commons licence – details of these licences and which [Creative Commons](#) licence will apply to this Work are set out in our licence referred to above.

Other than as permitted in any relevant BMJ Author's Self Archiving Policies, I confirm this Work has not been accepted for publication elsewhere, is not being considered for publication elsewhere and does not duplicate material already published. I confirm all authors consent to publication of this Work and authorise the granting of this licence.

1  
2  
3 **A prospective, observational, longitudinal study in paediatric patients with moderate-to-severe atopic**  
4 **dermatitis (PEDISTAD): study objectives, design and methodology**  
5  
6  
7  
8  
9

10 Amy S Paller,<sup>1</sup> Emma Guttman-Yassky,<sup>2</sup> Alan D Irvine,<sup>3,4</sup> Eulalia Baselga,<sup>5</sup> Marjolein de Bruin-Weller,<sup>6</sup>  
11  
12 Shyamalie Jayawardena,<sup>7</sup> Annie Zhang,<sup>8</sup> Paola Mina-Osorio,<sup>9</sup> Elena Rizova,<sup>8</sup> Zafer E Ozturk<sup>8</sup>  
13  
14  
15

16  
17 **Affiliations**

18  
19 <sup>1</sup>Northwestern University Feinberg School of Medicine, Chicago, IL, USA

20  
21 <sup>2</sup>Icahn School of Medicine at Mount Sinai Medical Center, New York, NY, USA

22  
23 <sup>3</sup>Trinity College Dublin, Dublin, Ireland

24  
25 <sup>4</sup>National Children's Research Centre, Our Lady's Children's Hospital Crumlin, Dublin, Ireland

26  
27 <sup>5</sup>Hospital de la Santa Creu i Sant Pau, Barcelona, Spain

28  
29 <sup>6</sup>University Medical Center Utrecht, Utrecht, Netherlands

30  
31 <sup>7</sup>Sanofi, Bridgewater, NJ, USA

32  
33 <sup>8</sup>Sanofi Genzyme, Cambridge, MA, USA

34  
35 <sup>9</sup>Regeneron Pharmaceuticals, Inc., Tarrytown, NY, USA  
36  
37  
38

39 **Correspondence to**

40  
41 Amy S Paller, MD; Professor and Chair, Department of Dermatology  
42  
43

44 **Address:**

45  
46 Northwestern University Feinberg School of Medicine

47  
48 676 N. St. Clair, Suite 1600

49  
50 Chicago, IL 60611

51  
52 **Telephone:** 001 312-695-3721

53  
54 **E-mail:** [APaller@nm.org](mailto:APaller@nm.org)  
55  
56  
57



**ORCID ID:**

Amy Paller: 0000-0001-6187-6549

Emma Guttman-Yassky: 0000-0002-9363-324X

Alan Irvine: 0000-0002-9048-2044

Eulalia Baselga: 0000-0003-1086-8439

Marjolein de Bruin-Weller: 0000-0002-1249-6993

Paola Mina-Osorio: 0000-0003-2986-9642

**Journal:** BMJ Open

**Article type:** Study protocol

**ClinicalTrials.gov identifier:** NCT03687359

**Manuscript word count:** 2,005 (4,000 word limit, excluding title page, abstract, tables, acknowledgements, contributions and references)

**Abstract word count:** 265 (300 word limit)

**References:** 14

**Figures:** 2

**Tables:** 4

## ABSTRACT

**Introduction:** Atopic dermatitis (AD) is a chronic inflammatory skin disease often associated with atopic comorbidities and has significant impact on children and their families. There is a lack of robust and longitudinal long-term data on disease characteristics and typical clinical practice with currently available treatments in children with moderate-to-severe AD. Hence, an observational study is needed to evaluate AD characteristics and progression in paediatric patients with moderate-to-severe AD.

**Methods and analysis:** Pediatric Study in Atopic Dermatitis (PEDISTAD) is a prospective, observational, longitudinal study in paediatric patients with moderate-to-severe AD who are currently receiving systemic or topical treatment and whose disease is not adequately controlled by topical prescription therapies or for whom those therapies are not medically advisable. 1300 children at 100-150 sites in approximately 20 countries worldwide will be enrolled and followed for 5 years. AD therapy is at the discretion of the investigator. Data collected will include: AD disease characteristics and comorbidities; current therapy for AD and initiation of new treatments/changes in current treatment; patient-/caregiver-reported outcomes; days missed from school/work for the patient/caregiver; healthcare professional visits; safety; and biomarkers.

**Ethics and dissemination:** This study is conducted in accordance with the principles established by the 18th World Medical Assembly and all subsequent amendments and the guidelines for Good Epidemiology Practice. Each individual country assures that ethics approval has been received and local regulatory requirements are met. Study data will be disseminated in manuscripts submitted to peer-reviewed medical journals as well as in abstracts submitted to congresses, and in the resulting posters and presentations.

ClinicalTrials.gov Identifier: NCT03687359.

**Key words:** atopic dermatitis, observational, paediatric, systemic treatment

### Strengths and limitations of this study

- PEDISTAD is a multinational, observational, longitudinal study in a large cohort of paediatric patients with moderate-to-severe atopic dermatitis (AD) that will collect long-term data on patient and disease characteristics, progression of disease, selected atopic comorbidities, real-world treatment patterns, efficacy and safety.
- Previous observational studies in patients with AD have not focused on moderate-to-severe disease leading to a gap in knowledge that will be addressed by this study.
- The observational nature of the study limits the robustness of the collected data compared to that obtained from blinded studies with control groups.
- Challenges of the study include patient recruitment in multiple countries and retention of patients through the observation period of 5 years, both of which can be difficult in young children.

## INTRODUCTION

Atopic dermatitis (AD) is a chronic inflammatory skin disease often associated with atopic comorbidities.[1,2] Due to lack of standardised diagnostic criteria and outcome measures of disease severity, there is variability in the reported prevalence rates of AD in children.

AD profoundly affects the quality of life of children and family members.[3] Itching can affect mood and sleep quality, and the chronic relapsing nature of AD has a detrimental impact on the quality of life of the family.[3] Children with AD may also have symptoms of anxiety and depression.[4]

Limited treatment options are available for children with moderate-to-severe AD and primarily include topical corticosteroids, topical calcineurin inhibitors, topical crisaborole and systemic immunosuppressants.[5-8] Most systemic agents are broadly immunosuppressive, used off-label and are not currently approved for use in children. In general, they do not provide a favourable long-term benefit–risk profile for paediatric patients with AD inadequately controlled by topical therapies. Furthermore, disease can often rebound after cessation of systemic therapy, especially after administration of systemic cyclosporine.[9]

There is a lack of robust and longitudinal long-term data related to disease characteristics and typical clinical practice with currently available treatments in children. Hence, an observational study is necessary to evaluate the characteristics of paediatric patients with moderate-to-severe AD whose disease is not adequately controlled with topical therapies or when those therapies are not medically advisable.

The Pediatric Study in Atopic Dermatitis (PEDISTAD) aims to address the substantial need for a better understanding of AD characteristics and progression, including patient and caregiver burden, in paediatric patients with moderate-to-severe AD who initiate, or are candidates for, systemic therapy. The study will document patient characteristics, patient- and caregiver-reported outcomes, AD progression, and atopic comorbidities and assess the effectiveness and safety of therapies (systemic and

1  
2  
3 topical) while describing real-world treatment patterns over a 5-year period. A biomarker sub-study will  
4  
5 analyze the association between biomarkers and disease state and time course of AD in a subset of  
6  
7 PEDISTAD study participants. Here we describe the objectives, design and endpoints of the PEDISTAD.  
8  
9  
10

## 11 **METHODS AND ANALYSIS**

12  
13  
14 PEDISTAD is an international, multicentre, longitudinal, prospective, non-interventional study designed  
15  
16 to describe the disease life course and comorbidities of paediatric patients with moderate-to-severe AD  
17  
18 whose disease is not adequately controlled with topical therapies or for whom those therapies are not  
19  
20 medically advisable (NCT03687359, study OBS15333, protocol version 1, 01 May 2018 and sub-study  
21  
22 LPS15496, protocol version 1, 10 April 2018). Current participating sites are listed in the Clinicaltrials.Gov  
23  
24 record.  
25  
26  
27  
28  
29

### 30 **Patients**

31  
32 This study will enrol a balanced number of patients aged <2 years, ≥2 to <6 years and ≥6 to <12 years at  
33  
34 baseline. Enrolment quotas with respect to treatment types (systemic vs topical) may be imposed to  
35  
36 ensure target numbers of patients in each treatment category. To minimise patient selection bias, all  
37  
38 eligible patients at each selected site should be invited to participate in this registry, until the global  
39  
40 enrolment goal or the site enrolment limit is met.  
41  
42  
43

44 AD therapy prescribed to patients who are enrolled in the study is not dictated per study protocol,  
45  
46 and the therapeutic drug prescription is decided by the medical judgement of the study investigator.  
47  
48 Patients may begin treatment with therapies that become commercially available during the course of  
49  
50 the study.  
51

52 Inclusion and exclusion criteria are reported in table 1. Briefly, patients are eligible for the study if  
53  
54 they are <12 years of age at baseline, have investigator-assessed moderate-to-severe disease and are  
55  
56  
57

1  
2  
3 either receiving systemic treatment for AD (including biologics (currently used off-label), UV therapy,  
4  
5 and immunomodulators such as cyclosporine, azathioprine, methotrexate, mycophenolate mofetil, and  
6  
7 corticosteroids) or are currently on topical treatment but would otherwise be candidates for systemic  
8  
9 therapy (systemic therapies do not include systemic antihistamines).  
10  
11  
12  
13

14 **Table 1** Inclusion and exclusion criteria  
15

|                                     |                                                                                                                                                                                                                                                                                                                                                                                                                                                                                                                                                                                                                                                                                                                                                                                                                                                                                                                                         |
|-------------------------------------|-----------------------------------------------------------------------------------------------------------------------------------------------------------------------------------------------------------------------------------------------------------------------------------------------------------------------------------------------------------------------------------------------------------------------------------------------------------------------------------------------------------------------------------------------------------------------------------------------------------------------------------------------------------------------------------------------------------------------------------------------------------------------------------------------------------------------------------------------------------------------------------------------------------------------------------------|
| <p>16 <b>Inclusion criteria</b></p> | <ul style="list-style-type: none"> <li>• Male or female &lt;12 years of age at baseline</li> <li>• Patients with moderate-to-severe AD according to the investigator's assessment</li> <li>• Treatment <ul style="list-style-type: none"> <li>- Currently receiving systemic treatment (including biologics (currently used off-label), UV therapy, cyclosporine, azathioprine, methotrexate, mycophenolate mofetil, and corticosteroids) for AD or</li> <li>- Currently on topical treatment, but otherwise candidates for systemic treatment due to <ul style="list-style-type: none"> <li>▪ Lack of adequate control and/or</li> <li>▪ Safety concern with long-term topical treatment</li> </ul> </li> </ul> </li> <li>• Signed informed consent by the parent/legally acceptable representative and assent by the patient appropriate to the patient's age, including willingness to participate in long-term follow-up</li> </ul> |
| <p>42 <b>Exclusion criteria</b></p> | <ul style="list-style-type: none"> <li>• Concurrent participation in an interventional clinical trial that modifies patient care</li> </ul>                                                                                                                                                                                                                                                                                                                                                                                                                                                                                                                                                                                                                                                                                                                                                                                             |

46 AD, atopic dermatitis.  
47  
48

#### 49 **Ethics and Dissemination**

50  
51 This study is being conducted in accordance with the principles established by the 18th World Medical  
52  
53 Assembly and all subsequent amendments and in accordance with the guidelines for Good Epidemiology  
54  
55  
56  
57

1  
2  
3 Practice. Each participating country should locally ensure all necessary regulatory submissions (for  
4  
5 example, Institutional Review Board/Institutional Ethics Committee) are performed in accordance with  
6  
7 local regulations, including local data protection regulations.  
8

9  
10 The study team and the study steering and scientific committees are responsible for study reporting and  
11  
12 interpretation, including interim data analyses and sub-group analyses. The data from the PEDISTAD  
13  
14 study will be disseminated in manuscripts for submission to peer-reviewed medical journals as well as in  
15  
16 abstracts for submission to congresses and in the resulting posters and presentations. The final decision  
17  
18 to publish will be made by the study scientific steering committee after prior notice to the sponsor to  
19  
20 allow for its internal review and comments.  
21  
22

### 23 24 25 **Patient and public involvement**

26  
27 Patients and the public were not involved in the design of this study.  
28  
29  
30  
31

### 32 33 **Study locations and timings**

34  
35 Approximately 100-150 sites in approximately 20 countries are expected to enrol 1300 patients (figure  
36  
37 1). Patient enrolment is expected to take 2 years, and the study duration for each patient is 5 years. A  
38  
39 total of 12 visits are planned for each enrolled patient. The study began on 28 September 2018 and is  
40  
41 expected to be completed in September 2025.  
42  
43  
44  
45

### 46 47 **Study endpoints and data collection**

48  
49 The primary and secondary objectives of the PEDISTAD are reported in table 2.  
50  
51  
52  
53  
54  
55  
56  
57

**Table 2** Primary and secondary objectives

|                             |                                                                                                                                                                                                                                                                                                                                           |
|-----------------------------|-------------------------------------------------------------------------------------------------------------------------------------------------------------------------------------------------------------------------------------------------------------------------------------------------------------------------------------------|
| <b>Primary objectives</b>   | <ul style="list-style-type: none"> <li>• To describe the characteristics of pediatric patients with moderate to severe AD whose disease is not adequately controlled with topical therapies or when those therapies are not medically advisable</li> <li>• To evaluate the time course of AD and selected atopic comorbidities</li> </ul> |
| <b>Secondary objectives</b> | <ul style="list-style-type: none"> <li>• To characterize disease burden and unmet need</li> <li>• To describe real-world treatment patterns (e.g., dosing regimens, treatment duration, and reasons for discontinuation and/or switching)</li> <li>• To document the real-world effectiveness and safety of treatments</li> </ul>         |

AD, atopic dermatitis.

Data collected will include: demographics; AD disease characteristics at baseline; the presence of selected comorbidities at baseline; time course of conditions including AD; current therapy for AD and initiation of new treatments/changes in current treatment over time; severity of disease at baseline and over the follow-up period (as assessed by Eczema Area and Severity Index (EASI) and Body Surface Area (BSA) percentage affected by atopic dermatitis, which the study investigators can use to assess disease severity at baseline); patient-/caregiver-reported outcomes at baseline and over the follow-up period; days missed from school for the patient and days missed from work for the primary caregiver due to AD; visits to healthcare professionals; disease state and evolution of selected atopic comorbid conditions; and photography of a representative area affected by AD at select centres and safety. The association between biomarkers and disease state and time course of AD will be examined by a biomarker sub-study collecting blood samples for analysis of protein and RNA biomarkers and cheek swabs for DNA genomic biomarkers. The data being collected in PEDISTAD are summarised in table 3, and the timings for data collection are shown in figure 2.



**Table 3** Data being collected in PEDISTAD

| Type                                                | Collected data                                                                                                                                                                                                                                                                                                                                                                                                                                                                                                                           |
|-----------------------------------------------------|------------------------------------------------------------------------------------------------------------------------------------------------------------------------------------------------------------------------------------------------------------------------------------------------------------------------------------------------------------------------------------------------------------------------------------------------------------------------------------------------------------------------------------------|
| <b>Patient and disease characteristics</b>          | <ul style="list-style-type: none"> <li>• Patient demographics and medical history</li> <li>• Personal and family history of AD and selected atopic comorbidities</li> <li>• Prior and concomitant medications for AD and comorbidities—all prior systemic therapy ever used, all topical and UV therapy in the previous 3 months as well as treatment(s) for other diseases including name, dose, route, frequency and start/stop date</li> <li>• Selected comorbidity presence throughout the study (as diagnosed by an HCP)</li> </ul> |
| <b>Patient-/caregiver-reported outcomes</b>         | <ul style="list-style-type: none"> <li>• POEM</li> <li>• CDLQI/IDQOL</li> <li>• DFI</li> <li>• Peak Pruritus NRS/Worst scratching NRS</li> <li>• CGAD</li> <li>• Days missed from school for the patient and days missed from work for the primary caregiver due to AD since last visit</li> <li>• TNSS</li> </ul>                                                                                                                                                                                                                       |
| <b>Physician assessments of AD disease activity</b> | <ul style="list-style-type: none"> <li>• EASI</li> <li>• BSA (%) affected by AD</li> </ul>                                                                                                                                                                                                                                                                                                                                                                                                                                               |
| <b>Safety data</b>                                  | <ul style="list-style-type: none"> <li>• All adverse events regardless of seriousness</li> </ul>                                                                                                                                                                                                                                                                                                                                                                                                                                         |
| <b>Other data</b>                                   | <ul style="list-style-type: none"> <li>• Visits to HCPs—type of HCP and reason for the visit</li> <li>• Investigator specialty and setting</li> <li>• Photography of a representative area affected by AD—optional (at select centres)</li> <li>• Reason for end of study</li> </ul>                                                                                                                                                                                                                                                     |
| <b>Biomarker data</b>                               | <ul style="list-style-type: none"> <li>• Serial blood samples for protein and RNA expression</li> <li>• Cheek swabs for DNA genomic biomarkers</li> </ul>                                                                                                                                                                                                                                                                                                                                                                                |

AD, atopic dermatitis; BSA, body surface area; CGAD, Caregiver Global Assessment of Disease; CDLQI, Children's Dermatology Life Quality Index; DFI, Dermatitis Family Impact; EASI, Eczema Area and Severity Index; HCP, healthcare professional; IDQOL, Infant's Dermatitis Quality of Life; NRS, Numerical Rating Scale; POEM, Patient-Oriented Eczema Measure; TNSS, Total Nasal Symptom Score.

## Statistical analysis

### Sample size

To ensure that approximately 930 patients complete the 5-year follow-up, approximately 1300 patients will be enrolled (about 435 in each age group). A sample of approximately 310 participants per age group will ensure a maximum width for the confidence interval of 11% for the estimates based on binary endpoints (table 4). This sample size needed requires that a total of 930 patients complete the study. The biomarker sub-study will be conducted in approximately 300 participants (100 participants within each age cohort), whose sample size is based empirically on the results of a previous biomarker study with similar objectives.[10]

**Table 4** Precision estimates for the overall population

| Width of the 95% CI      | Overall population<br>N=930 | 33% of overall population<br>N=310 |
|--------------------------|-----------------------------|------------------------------------|
| Binary data—widest width | 6.4%                        | 11.1%                              |
| Normal data              | 0.13 SD                     | 0.22 SD                            |

CI, confidence interval; SD, standard deviation.

### Analysis

All statistical analyses will be performed descriptively with no hypothesis testing. Patient- and care-giver reported outcomes will be summarised within each age cohort, as many are age-based assessments.

1  
2  
3 Continuous data will be described using summary statistics, including arithmetic mean, standard  
4  
5 deviation, median and range, while categorical data will be summarised using counts and percentages.  
6  
7

## 8 9 10 **DISCUSSION**

11  
12 The PEDISTAD study aims to address the lack of robust and longitudinal long-term data related to AD  
13  
14 characteristics, disease progression, development of comorbidities and the typical clinical practice with  
15  
16 currently available treatments in children with AD. By collecting information about clinical  
17  
18 characteristics, including patient- and care-giver reported outcomes, physician-assessed clinical severity,  
19  
20 safety of currently used medicines and photographs of a representative area affected by AD (at select  
21  
22 centres), over time, the PEDISTAD study aims to bridge this knowledge gap. A biomarker sub-study of  
23  
24 PEDISTAD will analyze the association between biomarkers and disease state and time course of AD in a  
25  
26 sub-set of PEDISTAD study participants.  
27  
28

29  
30 There are various disease trajectories in paediatric patients with AD, and clinical presentation varies  
31  
32 with different ages of onset and development of comorbid atopic conditions.[11,12] Patients in this  
33  
34 study will, hence, be recruited into 3 age cohorts (<2 years, ≥2 to <6 years and ≥6 to <12) and followed  
35  
36 for 5 years.  
37  
38

39  
40 The PEDISTAD is a real-world study and, therefore, strict entry criteria are not set. Enrolling  
41  
42 physicians are enabled to use their best judgement as to whether a patient meets the inclusion criteria  
43  
44 of moderate-to-severe AD using the assessment(s) of their choice. Physician assessment of disease  
45  
46 severity will be collected by Eczema Area and Severity Index (EASI) and Body Surface Area (BSA)  
47  
48 percentage affected by atopic dermatitis, which the study investigators can use to assess disease  
49  
50 severity at baseline. These assessments can also later be used to assess disease severity in patients over  
51  
52 time. Other objective measures of severity may be unfamiliar to clinicians who do not regularly  
53  
54  
55  
56  
57  
58  
59  
60

1  
2  
3 participate in clinical trials in atopic dermatitis, and a lack of familiarity may potentially diminish the  
4  
5 reliability of their results.  
6

7 A significant proportion of children have persistent disease;<sup>[12,13]</sup> thus, treatment approaches that  
8  
9 are effective and tolerated over large timespans are desired. The observational and long-term nature of  
10  
11 the PEDISTAD study serves to better understand the long-term evolution of disease burden in patients  
12  
13 and caregivers as well as to identify any unmet therapeutic need for moderate-to-severe AD.  
14  
15

16 Although there are no universal definitions of recalcitrance in AD patients, expert recommendations  
17  
18 mention that failure to respond to adequate topical therapy, a need for prolonged use of high-potency  
19  
20 topical steroids or repeated flares are suggestive of recalcitrance and make a patient eligible for  
21  
22 systemic therapy.<sup>[14]</sup> This observational study will provide insight into the characteristics of paediatric  
23  
24 patients initiated on or who become candidates for systemic therapy to better define when systemic  
25  
26 therapy is warranted.  
27  
28

29  
30 Paediatric AD presents clinically with a high degree of heterogeneity. In addition to the clinical  
31  
32 phenotype, biomarkers and endophenotypes are now considered fundamental to stratify complex  
33  
34 diseases into subgroups for which more tailored prevention and therapeutic strategies can be  
35  
36 developed. Due to the waxing and waning nature of AD and the fact that it can present throughout a  
37  
38 lifetime with long periods of remission in some individuals, the ability to predict disease exacerbations  
39  
40 or the appearance of associated atopic conditions using biomarkers could have a great impact in the  
41  
42 ability to manage the disease for long-term control. For this reason, a biomarker substudy in parallel  
43  
44 with the PEDISTAD study will collect blood samples with the objectives of exploring associations  
45  
46 between biomarkers of AD and disease state and time course of AD; disease state and evolution of  
47  
48 selected atopic comorbid conditions; and effectiveness of specific AD treatments.  
49  
50  
51

52 Observational studies in patients with AD to date have been limited by a variety of factors, including  
53  
54 number of participants, participating countries and the extent and duration of data collection. The  
55  
56  
57

1  
2  
3 PEDISTAD study aims to address all these issues. Furthermore, the PEDISTAD study will be the largest  
4  
5 study to date in a paediatric population with moderate-to-severe AD; by not focusing on  
6  
7 moderate-to-severe disease, other observational studies may have underestimated the risk of  
8  
9 comorbidities and disease persistence in this patient population.  
10

11  
12 Limitations of the PEDISTAD study include the open-label observational nature; thus, the collected  
13  
14 data may not be as robust as blinded studies with control groups. However, the challenges of running  
15  
16 long-term controlled studies, especially in this age group, are well known, and a control group may not  
17  
18 be crucial to fulfil the objectives of this study. Therefore, the data from this study are anticipated to be  
19  
20 highly valuable. Challenges include patient recruitment in multiple countries and sites and retention of  
21  
22 patients in this age group for up to 5 years, which is particularly difficult in very young children. Parental  
23  
24 education will be key to keeping patients enrolled in the study and to provide robust and reliable  
25  
26 patient-, caregiver- and physician-reported outcomes at reasonable intervals.  
27  
28  
29

30 In summary, PEDISTAD will improve our understanding of the long-term evolution of AD, disease  
31  
32 burden in patients and caregivers and the impact of therapy on paediatric patients with  
33  
34 moderate-to-severe AD and their families.  
35  
36  
37  
38  
39  
40  
41  
42  
43  
44  
45  
46  
47  
48  
49  
50  
51  
52  
53  
54  
55  
56  
57  
58  
59  
60

### Competing interests

**ASP:** AbbVie, AnaptysBio, Eli Lilly, Galderma, Incyte, Janssen, LEO Pharma, Novartis, Regeneron

Pharmaceuticals, Inc., Sanofi – investigator; AbbVie, Amgen, Asana, Dermavant, Dermira, Galderma, Eli Lilly, Forte, LEO Pharma, Matrisys Bioscience, Menlo Therapeutics, Morphosys/Galapagos, Novartis, Pfizer, Regeneron Pharmaceuticals, Inc., Sanofi – consultant.

**EG-Y:** AbbVie, Celgene, Eli Lilly, Galderma, GlaxoSmithKline, Glenmark, LEO Pharma, Pfizer, Regeneron Pharmaceuticals, Inc., Sanofi – investigator; AbbVie, Anacor, Asana Biosciences, Daiichi Sankyo, DBV, Dermira, Eli Lilly, Galderma, GlaxoSmithKline, Glenmark, Kiniksa Pharmaceuticals, Kyowa, LEO Pharma, Menlo Therapeutics, Novartis, Pfizer, Realm, Regeneron Pharmaceuticals, Inc., Sanofi – consultant; AbbVie, Celgene, Dermira, Galderma, Innovaderm, Janssen, LEO Pharma, Novartis, Pfizer, Regeneron Pharmaceuticals, Inc., Sanofi – research grants.

**ADI:** AbbVie, Chugai Pharma, Genentech, Janssen, Novartis, Pfizer, Regeneron Pharmaceuticals, Inc., Sanofi Genzyme – consultant.

**EB:** Almirall – speaker; AbbVie, Eli Lilly, Pfizer – investigator; Pierre Fabre Dermatology – investigator, consultant; Regeneron Pharmaceuticals, Inc., Sanofi Genzyme – consultant; Venthera – co-founder, consultant.

**MdeB-W:** Regeneron Pharmaceuticals, Inc., Sanofi Genzyme – investigator, advisory board member, speaker, consultant; AbbVie, Pfizer – investigator, advisory board member; Eli Lilly, UCB – advisory board member

**SJ, AZ, ER, ZEO:** Sanofi – employees, may hold stock and/or stock options in the company.

**PM-O:** Regeneron Pharmaceuticals, Inc. – employee and shareholder.

1  
2  
3 **Funding** This work was supported by Sanofi and Regeneron Pharmaceuticals, Inc. Medical writing and  
4 editorial assistance was provided by Carolyn Ellenberger, PhD, of Excerpta Medica, funded by Sanofi  
5 Genzyme and Regeneron Pharmaceuticals, Inc. Investigators will collect consent forms and data.  
6  
7 Analysis of the data will be performed by the sponsor. The scientific committee of the study will have  
8 full access to the final data allowing for appropriate analysis and reporting of the study results.  
9  
10  
11  
12  
13  
14  
15

### 16 **Contributors to the protocol**

17  
18 ASP, EG-Y, ADI, EB, MdeB-W were involved in design of the study and are active steering committee  
19 members for the study.  
20  
21

22  
23 SJ contributed to the design and development of the protocol and is the statistical lead.  
24

25 AZ, PM-O, ER, ZEO contributed to the design and development of the protocol and are medical leads.  
26

27  
28 All authors critically revised the manuscript, gave final approval of the manuscript, and are accountable  
29 for the accuracy and integrity of the manuscript.  
30  
31  
32  
33  
34  
35  
36  
37  
38  
39  
40  
41  
42  
43  
44  
45  
46  
47  
48  
49  
50  
51  
52  
53  
54  
55  
56  
57  
58  
59  
60

## REFERENCES

1. Shrestha S, Miao R, Wang L, *et al.* Burden of atopic dermatitis in the United States: Analysis of healthcare claims data in the Commercial, Medicare, and Medi-Cal databases. *Adv Ther* 2017;34:1989–2006.
2. Weidinger S, Beck LA, Beiber T, *et al.* Atopic dermatitis. *Nat Rev Dis Primers* 2018;4:1.
3. Ricci G, Bellini F, Dondi A, *et al.* Atopic dermatitis in adolescence. *Dermatol Reports* 2011;4:e1
4. Rønnstad ATM, Halling-Overgaard AS, Hamann CR, *et al.* Association of atopic dermatitis with depression, anxiety, and suicidal ideation in children and adults: A systematic review and meta-analysis. *J Am Acad Dermatol* 2018;79:448–56.
5. Wollenberg A, Oranje A, Deleuran M, *et al.* ETFAD/EADV Eczema task force 2015 position paper on diagnosis and treatment of atopic dermatitis in adult and paediatric patients. *J Eur Acad Dermatol Venereol* 2016;30:729–47.
6. Sidbury R, Tom WL, Bergman JN, *et al.* Guidelines of care for the management of atopic dermatitis: Section 4. Prevention of disease flares and use of adjunctive therapies and approaches. *J Am Acad Dermatol* 2014;71:1218–33.
7. Ring J, Alomar A, Bieber T, *et al.* Guidelines for treatment of atopic eczema (atopic dermatitis) Part II. *J Eur Acad Dermatol Venereol* 2012;26:1176–93.
8. EUCRISA. Highlights of Prescribing Information, FDA 2017.  
[https://www.accessdata.fda.gov/drugsatfda\\_docs/label/2017/207695s002lbl.pdf](https://www.accessdata.fda.gov/drugsatfda_docs/label/2017/207695s002lbl.pdf). (accessed 4 January 2019).
9. Sibbald C, Pope E, Ho N, *et al.* Retrospective review of relapse after systemic cyclosporine in children with atopic dermatitis. *Pediatr Dermatol* 2015;32:36–40.



- 1  
2  
3 10. Thijs JL, Strickland I, Bruijnzeel-Koomen CAFM, *et al.* Moving toward endotypes in atopic  
4 dermatitis: Identification of patient clusters based on serum biomarker analysis. *J Allergy Clin*  
5  
6 *Immunol* 2017;140:730–7.  
7  
8  
9  
10 11. Irvine AD, Mina-Osorio P. Disease trajectories in childhood atopic dermatitis: an update and  
11  
12 practitioner's guide. *Br J Dermatol* doi: 10.1111/bjd.17766. [published Online First 13 February  
13  
14 2019].  
15  
16 12. Paller AS, Spergel JM, Mina-Osorio P, *et al.* The atopic march and atopic multimorbidity: Many  
17  
18 trajectories, many pathways. *J Allergy Clin Immunol* 2019; 143:46–55.  
19  
20 13. Kim JP, Chao LX, Simpson EL, *et al.* Persistence of atopic dermatitis (AD): a systematic review and  
21  
22 meta-analysis. *J Am Acad Dermatol* 2016;75:681–7.  
23  
24  
25 14. Simpson EL, Bruin-Weller M, Flohr C, *et al.* When does atopic dermatitis warrant systemic  
26  
27 therapy? Recommendations from an expert panel of the International Eczema Council. *J Am*  
28  
29 *Acad Dermatol* 2017;77:623–33.  
30  
31  
32  
33  
34  
35  
36  
37  
38  
39  
40  
41  
42  
43  
44  
45  
46  
47  
48  
49  
50  
51  
52  
53  
54  
55  
56  
57  
58  
59  
60

1  
2  
3 **Figure legends**  
4

5 **Figure 1** Patients and study locations  
6

7 **Figure 2** Data collection schedule  
8

9  
10 AD, atopic dermatitis; HCP, healthcare professional.  
11  
12  
13  
14  
15  
16  
17  
18  
19  
20  
21  
22  
23  
24  
25  
26  
27  
28  
29  
30  
31  
32  
33  
34  
35  
36  
37  
38  
39  
40  
41  
42  
43  
44  
45  
46  
47  
48  
49  
50  
51  
52  
53  
54  
55  
56  
57  
58  
59  
60

For peer review only

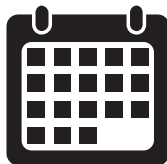

**Total duration:** 5 years

**Enrolment:** 2 years

**Visits:** 12 planned (according to standard of care)

1  
2  
3  
4  
5  
6  
7  
8  
9  
10  
11  
12  
13  
14  
15  
16  
17  
18  
19  
20  
21  
22  
23  
24  
25  
26  
27  
28  
29

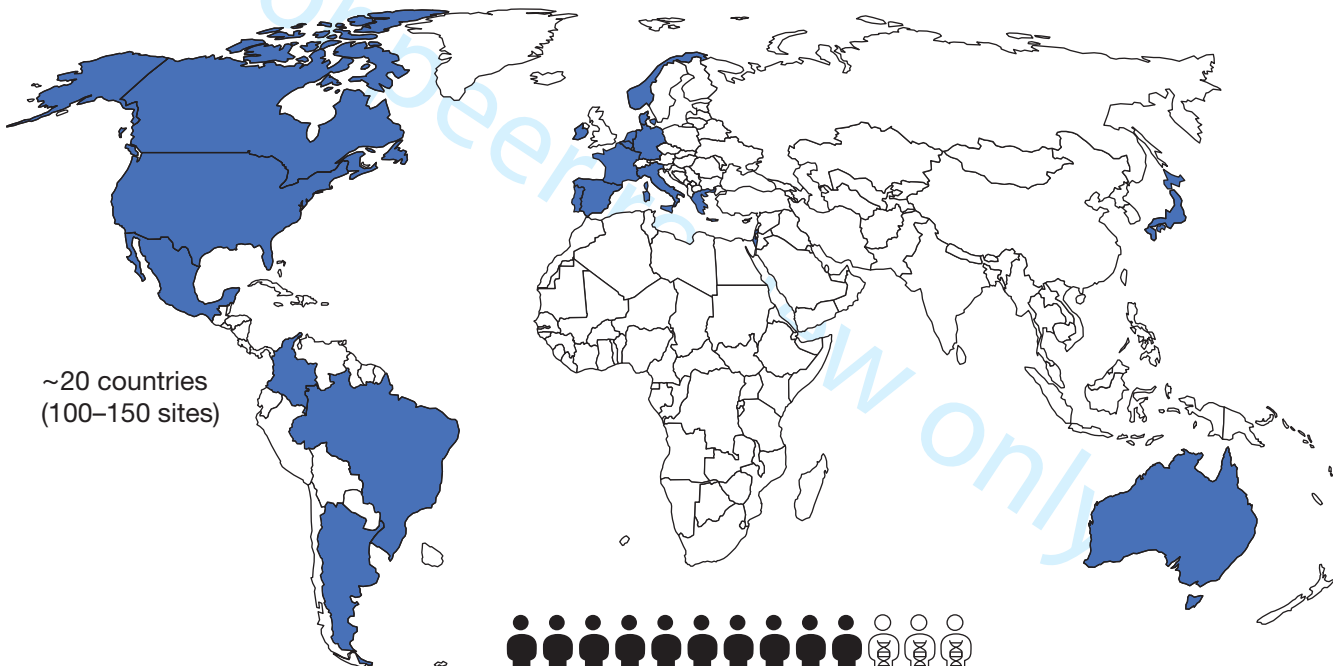

~20 countries  
(100–150 sites)

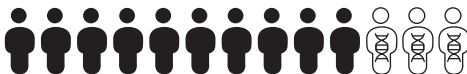

For peer review only - <http://bmjopen.bmj.com/site/about/guidelines.xhtml>  
1,300 patients (300 for biomarker study)

Months 12–54

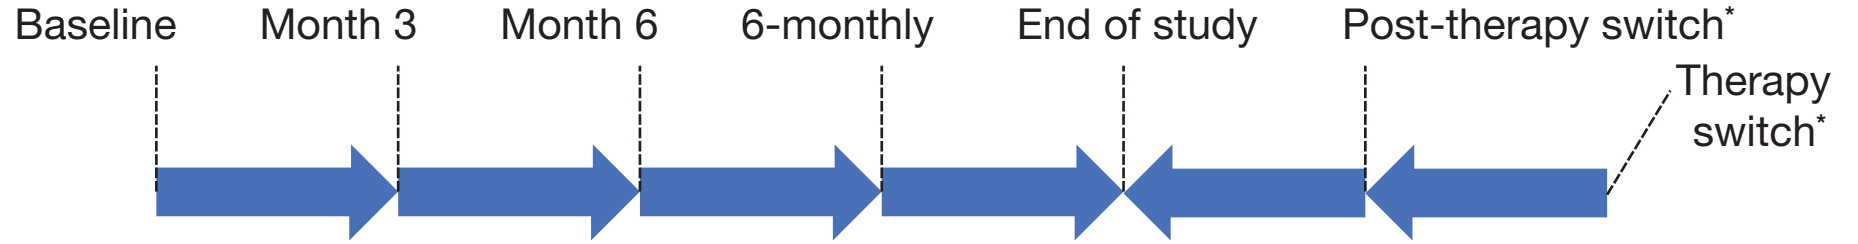

|                                         | Baseline | Month 3 | Month 6 | 6-monthly | End of study | Post-therapy switch* |
|-----------------------------------------|----------|---------|---------|-----------|--------------|----------------------|
| 10 Patient and disease characteristics  |          |         |         |           |              |                      |
| 14 Physician assessments of AD activity |          |         |         |           |              |                      |
| 18 Patient/caregiver-reported outcomes  |          |         |         |           |              |                      |
| 23 Safety                               |          |         |         |           |              |                      |
| 27 HCP visit                            |          |         |         |           |              |                      |
| 31 Photography (optional)               |          |         |         |           |              |                      |
| 34 Cheek swabs                          |          |         |         |           |              |                      |
| 39 Blood samples†                       |          |         |         |           |              |                      |

For peer review only

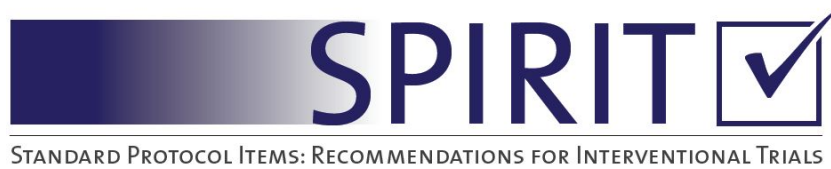

SPIRIT 2013 Checklist: Recommended items to address in a clinical trial protocol and related documents\*

| Section/item                      | ItemNo | Description                                                                                                                                                                                                                                                                              | Page    |
|-----------------------------------|--------|------------------------------------------------------------------------------------------------------------------------------------------------------------------------------------------------------------------------------------------------------------------------------------------|---------|
| <b>Administrative information</b> |        |                                                                                                                                                                                                                                                                                          |         |
| Title                             | 1      | Descriptive title identifying the study design, population, interventions, and, if applicable, trial acronym                                                                                                                                                                             | 1       |
| Trial registration                | 2a     | Trial identifier and registry name. If not yet registered, name of intended registry                                                                                                                                                                                                     | 2, 3, 6 |
|                                   | 2b     | All items from the World Health Organization Trial Registration Data Set                                                                                                                                                                                                                 |         |
| Protocol version                  | 3      | Date and version identifier                                                                                                                                                                                                                                                              | 6       |
| Funding                           | 4      | Sources and types of financial, material, and other support                                                                                                                                                                                                                              | 14–15   |
| Roles and responsibilities        | 5a     | Names, affiliations, and roles of protocol contributors                                                                                                                                                                                                                                  | 1, 15   |
|                                   | 5b     | Name and contact information for the trial sponsor                                                                                                                                                                                                                                       | 1, 14   |
|                                   | 5c     | Role of study sponsor and funders, if any, in study design; collection, management, analysis, and interpretation of data; writing of the report; and the decision to submit the report for publication, including whether they will have ultimate authority over any of these activities | 14–15   |
|                                   | 5d     | Composition, roles, and responsibilities of the coordinating centre, steering committee, endpoint adjudication committee, data management team, and other individuals or groups overseeing the trial, if applicable (see Item 21a for data monitoring committee)                         | 10, 15  |
| <b>Introduction</b>               |        |                                                                                                                                                                                                                                                                                          |         |
| Background and rationale          | 6a     | Description of research question and justification for undertaking the trial, including summary of relevant studies (published and unpublished) examining benefits and harms for each intervention                                                                                       | 5–6     |
|                                   | 6b     | Explanation for choice of comparators                                                                                                                                                                                                                                                    | N/A     |

|    |                                                           |     |                                                            |               |
|----|-----------------------------------------------------------|-----|------------------------------------------------------------|---------------|
| 1  |                                                           |     |                                                            |               |
| 2  | Objectives                                                | 7   | Specific objectives or hypotheses                          | 5–6           |
| 3  |                                                           |     |                                                            |               |
| 4  | Trial design                                              | 8   | Description of trial design including type of trial (eg,   | 6             |
| 5  |                                                           |     | parallel group, crossover, factorial, single group),       |               |
| 6  |                                                           |     | allocation ratio, and framework (eg, superiority,          |               |
| 7  |                                                           |     | equivalence, noninferiority, exploratory)                  |               |
| 8  |                                                           |     |                                                            |               |
| 9  |                                                           |     |                                                            |               |
| 10 | <b>Methods: Participants, interventions, and outcomes</b> |     |                                                            |               |
| 11 |                                                           |     |                                                            |               |
| 12 | Study setting                                             | 9   | Description of study settings (eg, community clinic,       | 6, figure 1   |
| 13 |                                                           |     | academic hospital) and list of countries where data will   |               |
| 14 |                                                           |     | be collected. Reference to where list of study sites can   |               |
| 15 |                                                           |     | be obtained                                                |               |
| 16 |                                                           |     |                                                            |               |
| 17 | Eligibility criteria                                      | 10  | Inclusion and exclusion criteria for participants. If      | 6–7, table 1  |
| 18 |                                                           |     | applicable, eligibility criteria for study centres and     |               |
| 19 |                                                           |     | individuals who will perform the interventions (eg,        |               |
| 20 |                                                           |     | surgeons, psychotherapists)                                |               |
| 21 |                                                           |     |                                                            |               |
| 22 |                                                           |     |                                                            |               |
| 23 | Interventions                                             | 11a | Interventions for each group with sufficient detail to     | N/A,          |
| 24 |                                                           |     | allow replication, including how and when they will be     | observational |
| 25 |                                                           |     | administered                                               |               |
| 26 |                                                           |     |                                                            |               |
| 27 |                                                           |     |                                                            |               |
| 28 |                                                           | 11b | Criteria for discontinuing or modifying allocated          | 6             |
| 29 |                                                           |     | interventions for a given trial participant (eg, drug dose |               |
| 30 |                                                           |     | change in response to harms, participant request, or       |               |
| 31 |                                                           |     | improving/worsening disease)                               |               |
| 32 |                                                           |     |                                                            |               |
| 33 |                                                           |     |                                                            |               |
| 34 |                                                           | 11c | Strategies to improve adherence to intervention            | N/A,          |
| 35 |                                                           |     | protocols, and any procedures for monitoring               | observational |
| 36 |                                                           |     | adherence (eg, drug tablet return, laboratory tests)       |               |
| 37 |                                                           |     |                                                            |               |
| 38 |                                                           | 11d | Relevant concomitant care and interventions that are       | N/A,          |
| 39 |                                                           |     | permitted or prohibited during the trial                   | observational |
| 40 |                                                           |     |                                                            |               |
| 41 | Outcomes                                                  | 12  | Primary, secondary, and other outcomes, including the      | Page 8-9,     |
| 42 |                                                           |     | specific measurement variable (eg, systolic blood          | table 2       |
| 43 |                                                           |     | pressure), analysis metric (eg, change from baseline,      |               |
| 44 |                                                           |     | final value, time to event), method of aggregation (eg,    |               |
| 45 |                                                           |     | median, proportion), and time point for each outcome.      |               |
| 46 |                                                           |     | Explanation of the clinical relevance of chosen efficacy   |               |
| 47 |                                                           |     | and harm outcomes is strongly recommended                  |               |
| 48 |                                                           |     |                                                            |               |
| 49 |                                                           |     |                                                            |               |
| 50 | Participant                                               | 13  | Time schedule of enrolment, interventions (including       | 8, figure 2   |
| 51 | timeline                                                  |     | any run-ins and washouts), assessments, and visits for     |               |
| 52 |                                                           |     | participants. A schematic diagram is highly                |               |
| 53 |                                                           |     | recommended (see Figure)                                   |               |
| 54 |                                                           |     |                                                            |               |
| 55 |                                                           |     |                                                            |               |
| 56 |                                                           |     |                                                            |               |
| 57 |                                                           |     |                                                            |               |
| 58 |                                                           |     |                                                            |               |
| 59 |                                                           |     |                                                            |               |
| 60 |                                                           |     |                                                            |               |

|   |             |    |                                                         |              |
|---|-------------|----|---------------------------------------------------------|--------------|
| 1 |             |    |                                                         |              |
| 2 | Sample size | 14 | Estimated number of participants needed to achieve      | 10–11, table |
| 3 |             |    | study objectives and how it was determined, including   | 3            |
| 4 |             |    | clinical and statistical assumptions supporting any     |              |
| 5 |             |    | sample size calculations                                |              |
| 6 |             |    |                                                         |              |
| 7 | Recruitment | 15 | Strategies for achieving adequate participant enrolment | N/A          |
| 8 |             |    | to reach target sample size                             |              |
| 9 |             |    |                                                         |              |

### Methods: Assignment of interventions (for controlled trials)

#### Allocation:

|    |                |     |                                                           |               |
|----|----------------|-----|-----------------------------------------------------------|---------------|
| 14 | Sequence       | 16a | Method of generating the allocation sequence (eg,         | N/A,          |
| 15 | generation     |     | computer-generated random numbers), and list of any       | observational |
| 16 |                |     | factors for stratification. To reduce predictability of a |               |
| 17 |                |     | random sequence, details of any planned restriction       |               |
| 18 |                |     | (eg, blocking) should be provided in a separate           |               |
| 19 |                |     | document that is unavailable to those who enrol           |               |
| 20 |                |     | participants or assign interventions                      |               |
| 21 |                |     |                                                           |               |
| 22 |                |     |                                                           |               |
| 23 |                |     |                                                           |               |
| 24 | Allocation     | 16b | Mechanism of implementing the allocation sequence         | N/A,          |
| 25 | concealment    |     | (eg, central telephone; sequentially numbered, opaque,    | observational |
| 26 | mechanism      |     | sealed envelopes), describing any steps to conceal the    |               |
| 27 |                |     | sequence until interventions are assigned                 |               |
| 28 |                |     |                                                           |               |
| 29 |                |     |                                                           |               |
| 30 | Implementation | 16c | Who will generate the allocation sequence, who will       | N/A,          |
| 31 |                |     | enrol participants, and who will assign participants to   | observational |
| 32 |                |     | interventions                                             |               |
| 33 |                |     |                                                           |               |
| 34 | Blinding       | 17a | Who will be blinded after assignment to interventions     | N/A,          |
| 35 | (masking)      |     | (eg, trial participants, care providers, outcome          | observational |
| 36 |                |     | assessors, data analysts), and how                        |               |
| 37 |                |     |                                                           |               |
| 38 |                |     |                                                           |               |
| 39 |                | 17b | If blinded, circumstances under which unblinding is       | N/A,          |
| 40 |                |     | permissible, and procedure for revealing a participant's  | observational |
| 41 |                |     | allocated intervention during the trial                   |               |
| 42 |                |     |                                                           |               |

### Methods: Data collection, management, and analysis

|    |                 |     |                                                             |       |
|----|-----------------|-----|-------------------------------------------------------------|-------|
| 45 | Data collection | 18a | Plans for assessment and collection of outcome,             | 8, 10 |
| 46 | methods         |     | baseline, and other trial data, including any related       |       |
| 47 |                 |     | processes to promote data quality (eg, duplicate            |       |
| 48 |                 |     | measurements, training of assessors) and a description      |       |
| 49 |                 |     | of study instruments (eg, questionnaires, laboratory        |       |
| 50 |                 |     | tests) along with their reliability and validity, if known. |       |
| 51 |                 |     | Reference to where data collection forms can be found,      |       |
| 52 |                 |     | if not in the protocol                                      |       |
| 53 |                 |     |                                                             |       |
| 54 |                 |     |                                                             |       |
| 55 |                 |     |                                                             |       |
| 56 |                 | 18b | Plans to promote participant retention and complete         | N/A   |
| 57 |                 |     | follow-up, including list of any outcome data to be         |       |
| 58 |                 |     | collected for participants who discontinue or deviate       |       |
| 59 |                 |     | from intervention protocols                                 |       |
| 60 |                 |     |                                                             |       |

|    |                                 |     |                                                              |               |
|----|---------------------------------|-----|--------------------------------------------------------------|---------------|
| 1  |                                 |     |                                                              |               |
| 2  | Data                            | 19  | Plans for data entry, coding, security, and storage,         | N/A           |
| 3  | management                      |     | including any related processes to promote data quality      |               |
| 4  |                                 |     | (eg, double data entry; range checks for data values).       |               |
| 5  |                                 |     | Reference to where details of data management                |               |
| 6  |                                 |     | procedures can be found, if not in the protocol              |               |
| 7  |                                 |     |                                                              |               |
| 8  | Statistical                     | 20a | Statistical methods for analysing primary and                | 10            |
| 9  | methods                         |     | secondary outcomes. Reference to where other details         |               |
| 10 |                                 |     | of the statistical analysis plan can be found, if not in the |               |
| 11 |                                 |     | protocol                                                     |               |
| 12 |                                 |     |                                                              |               |
| 13 |                                 |     |                                                              |               |
| 14 |                                 | 20b | Methods for any additional analyses (eg, subgroup and        | N/A           |
| 15 |                                 |     | adjusted analyses)                                           |               |
| 16 |                                 |     |                                                              |               |
| 17 |                                 |     |                                                              |               |
| 18 |                                 | 20c | Definition of analysis population relating to protocol       | N/A,          |
| 19 |                                 |     | non-adherence (eg, as randomised analysis), and any          | observational |
| 20 |                                 |     | statistical methods to handle missing data (eg, multiple     |               |
| 21 |                                 |     | imputation)                                                  |               |
| 22 |                                 |     |                                                              |               |
| 23 | <b>Methods: Monitoring</b>      |     |                                                              |               |
| 24 |                                 |     |                                                              |               |
| 25 | Data monitoring                 | 21a | Composition of data monitoring committee (DMC);              | N/A           |
| 26 |                                 |     | summary of its role and reporting structure; statement       |               |
| 27 |                                 |     | of whether it is independent from the sponsor and            |               |
| 28 |                                 |     | competing interests; and reference to where further          |               |
| 29 |                                 |     | details about its charter can be found, if not in the        |               |
| 30 |                                 |     | protocol. Alternatively, an explanation of why a DMC is      |               |
| 31 |                                 |     | not needed                                                   |               |
| 32 |                                 |     |                                                              |               |
| 33 |                                 |     |                                                              |               |
| 34 |                                 |     |                                                              |               |
| 35 |                                 | 21b | Description of any interim analyses and stopping             | N/A,          |
| 36 |                                 |     | guidelines, including who will have access to these          | observational |
| 37 |                                 |     | interim results and make the final decision to terminate     |               |
| 38 |                                 |     | the trial                                                    |               |
| 39 |                                 |     |                                                              |               |
| 40 | Harms                           | 22  | Plans for collecting, assessing, reporting, and              | N/A,          |
| 41 |                                 |     | managing solicited and spontaneously reported                | observational |
| 42 |                                 |     | adverse events and other unintended effects of trial         |               |
| 43 |                                 |     | interventions or trial conduct                               |               |
| 44 |                                 |     |                                                              |               |
| 45 |                                 |     |                                                              |               |
| 46 | Auditing                        | 23  | Frequency and procedures for auditing trial conduct, if      | N/A           |
| 47 |                                 |     | any, and whether the process will be independent from        |               |
| 48 |                                 |     | investigators and the sponsor                                |               |
| 49 |                                 |     |                                                              |               |
| 50 |                                 |     |                                                              |               |
| 51 | <b>Ethics and dissemination</b> |     |                                                              |               |
| 52 |                                 |     |                                                              |               |
| 53 | Research ethics                 | 24  | Plans for seeking research ethics                            | 7             |
| 54 | approval                        |     | committee/institutional review board (REC/IRB)               |               |
| 55 |                                 |     | approval                                                     |               |
| 56 |                                 |     |                                                              |               |
| 57 |                                 |     |                                                              |               |
| 58 |                                 |     |                                                              |               |
| 59 |                                 |     |                                                              |               |
| 60 |                                 |     |                                                              |               |



|    |                   |     |                                                            |               |
|----|-------------------|-----|------------------------------------------------------------|---------------|
| 1  |                   |     |                                                            |               |
| 2  | Protocol          | 25  | Plans for communicating important protocol                 | N/A           |
| 3  | amendments        |     | modifications (eg, changes to eligibility criteria,        |               |
| 4  |                   |     | outcomes, analyses) to relevant parties (eg,               |               |
| 5  |                   |     | investigators, REC/IRBs, trial participants, trial         |               |
| 6  |                   |     | registries, journals, regulators)                          |               |
| 7  |                   |     |                                                            |               |
| 8  | Consent or assent | 26a | Who will obtain informed consent or assent from            | N/A           |
| 9  |                   |     | potential trial participants or authorised surrogates, and |               |
| 10 |                   |     | how (see Item 32)                                          |               |
| 11 |                   |     |                                                            |               |
| 12 |                   |     |                                                            |               |
| 13 |                   | 26b | Additional consent provisions for collection and use of    | N/A           |
| 14 |                   |     | participant data and biological specimens in ancillary     |               |
| 15 |                   |     | studies, if applicable                                     |               |
| 16 |                   |     |                                                            |               |
| 17 | Confidentiality   | 27  | How personal information about potential and enrolled      | N/A           |
| 18 |                   |     | participants will be collected, shared, and maintained in  |               |
| 19 |                   |     | order to protect confidentiality before, during, and after |               |
| 20 |                   |     | the trial                                                  |               |
| 21 |                   |     |                                                            |               |
| 22 |                   |     |                                                            |               |
| 23 | Declaration of    | 28  | Financial and other competing interests for principal      | 14–15         |
| 24 | interests         |     | investigators for the overall trial and each study site    |               |
| 25 |                   |     |                                                            |               |
| 26 | Access to data    | 29  | Statement of who will have access to the final trial       | N/A           |
| 27 |                   |     | dataset, and disclosure of contractual agreements that     |               |
| 28 |                   |     | limit such access for investigators                        |               |
| 29 |                   |     |                                                            |               |
| 30 |                   |     |                                                            |               |
| 31 | Ancillary and     | 30  | Provisions, if any, for ancillary and post-trial care, and | N/A,          |
| 32 | post-trial care   |     | for compensation to those who suffer harm from trial       | observational |
| 33 |                   |     | participation                                              |               |
| 34 |                   |     |                                                            |               |
| 35 | Dissemination     | 31a | Plans for investigators and sponsor to communicate         | 10            |
| 36 | policy            |     | trial results to participants, healthcare professionals,   |               |
| 37 |                   |     | the public, and other relevant groups (eg, via             |               |
| 38 |                   |     | publication, reporting in results databases, or other      |               |
| 39 |                   |     | data sharing arrangements), including any publication      |               |
| 40 |                   |     | restrictions                                               |               |
| 41 |                   |     |                                                            |               |
| 42 |                   |     |                                                            |               |
| 43 |                   |     |                                                            |               |
| 44 |                   | 31b | Authorship eligibility guidelines and any intended use of  |               |
| 45 |                   |     | professional writers                                       |               |
| 46 |                   |     |                                                            |               |
| 47 |                   | 31c | Plans, if any, for granting public access to the full      | N/A           |
| 48 |                   |     | protocol, participant-level dataset, and statistical code  |               |
| 49 |                   |     |                                                            |               |
| 50 | <b>Appendices</b> |     |                                                            |               |
| 51 |                   |     |                                                            |               |
| 52 | Informed consent  | 32  | Model consent form and other related documentation         | N/A           |
| 53 | materials         |     | given to participants and authorised surrogates            |               |
| 54 |                   |     |                                                            |               |
| 55 | Biological        | 33  | Plans for collection, laboratory evaluation, and storage   | N/A           |
| 56 | specimens         |     | of biological specimens for genetic or molecular           |               |
| 57 |                   |     | analysis in the current trial and for future use in        |               |
| 58 |                   |     | ancillary studies, if applicable                           |               |
| 59 |                   |     |                                                            |               |
| 60 |                   |     |                                                            |               |

1 \*It is strongly recommended that this checklist be read in conjunction with the SPIRIT 2013  
2 Explanation & Elaboration for important clarification on the items. Amendments to the  
3 protocol should be tracked and dated. The SPIRIT checklist is copyrighted by the SPIRIT  
4 Group under the Creative Commons "[Attribution-NonCommercial-NoDerivs 3.0 Unported](#)"  
5 license.  
6  
7  
8  
9  
10  
11  
12  
13  
14  
15  
16  
17  
18  
19  
20  
21  
22  
23  
24  
25  
26  
27  
28  
29  
30  
31  
32  
33  
34  
35  
36  
37  
38  
39  
40  
41  
42  
43  
44  
45  
46  
47  
48  
49  
50  
51  
52  
53  
54  
55  
56  
57  
58  
59  
60

For peer review only

# BMJ Open

## A prospective, observational, longitudinal study in paediatric patients with moderate-to-severe atopic dermatitis (PEDISTAD): study objectives, design and methodology: a study protocol

|                                 |                                                                                                                                                                                                                                                                                                                                                                                                                                                                                                                                                                                                           |
|---------------------------------|-----------------------------------------------------------------------------------------------------------------------------------------------------------------------------------------------------------------------------------------------------------------------------------------------------------------------------------------------------------------------------------------------------------------------------------------------------------------------------------------------------------------------------------------------------------------------------------------------------------|
| Journal:                        | <i>BMJ Open</i>                                                                                                                                                                                                                                                                                                                                                                                                                                                                                                                                                                                           |
| Manuscript ID                   | bmjopen-2019-033507.R2                                                                                                                                                                                                                                                                                                                                                                                                                                                                                                                                                                                    |
| Article Type:                   | Protocol                                                                                                                                                                                                                                                                                                                                                                                                                                                                                                                                                                                                  |
| Date Submitted by the Author:   | 20-Dec-2019                                                                                                                                                                                                                                                                                                                                                                                                                                                                                                                                                                                               |
| Complete List of Authors:       | Paller, Amy; Northwestern University Feinberg School of Medicine, Department of Dermatology<br>Guttman-Yassky, Emma; Icahn School of Medicine at Mount Sinai, Irvine, Alan; Trinity College Dublin; National Children's Research Centre, Our Lady's Children's Hospital Crumlin<br>Baselga, Eulalia; Hospital de la Santa Creu i Sant Pau, de Bruin-Weller, Marjolein; Universitair Medisch Centrum Utrecht, Dermatology<br>Jayawardena, Shyamalie; Sanofi<br>Zhang, Annie; Sanofi<br>Mina-Osorio, Paola; Regeneron Pharmaceuticals Inc<br>Rizova, Elena; Sanofi Genzyme<br>Ozturk, Zafer; Sanofi Genzyme |
| <b>Primary Subject Heading</b>: | Dermatology                                                                                                                                                                                                                                                                                                                                                                                                                                                                                                                                                                                               |
| Secondary Subject Heading:      | Immunology (including allergy), Paediatrics                                                                                                                                                                                                                                                                                                                                                                                                                                                                                                                                                               |
| Keywords:                       | DERMATOLOGY, Paediatric dermatology < DERMATOLOGY, Eczema < DERMATOLOGY, IMMUNOLOGY                                                                                                                                                                                                                                                                                                                                                                                                                                                                                                                       |
|                                 |                                                                                                                                                                                                                                                                                                                                                                                                                                                                                                                                                                                                           |

SCHOLARONE™  
Manuscripts

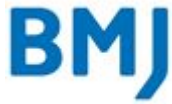

I, the Submitting Author has the right to grant and does grant on behalf of all authors of the Work (as defined in the below author licence), an exclusive licence and/or a non-exclusive licence for contributions from authors who are: i) UK Crown employees; ii) where BMJ has agreed a CC-BY licence shall apply, and/or iii) in accordance with the terms applicable for US Federal Government officers or employees acting as part of their official duties; on a worldwide, perpetual, irrevocable, royalty-free basis to BMJ Publishing Group Ltd ("BMJ") its licensees and where the relevant Journal is co-owned by BMJ to the co-owners of the Journal, to publish the Work in this journal and any other BMJ products and to exploit all rights, as set out in our [licence](#).

The Submitting Author accepts and understands that any supply made under these terms is made by BMJ to the Submitting Author unless you are acting as an employee on behalf of your employer or a postgraduate student of an affiliated institution which is paying any applicable article publishing charge ("APC") for Open Access articles. Where the Submitting Author wishes to make the Work available on an Open Access basis (and intends to pay the relevant APC), the terms of reuse of such Open Access shall be governed by a Creative Commons licence – details of these licences and which [Creative Commons](#) licence will apply to this Work are set out in our licence referred to above.

Other than as permitted in any relevant BMJ Author's Self Archiving Policies, I confirm this Work has not been accepted for publication elsewhere, is not being considered for publication elsewhere and does not duplicate material already published. I confirm all authors consent to publication of this Work and authorise the granting of this licence.

1  
2  
3 **A prospective, observational, longitudinal study in paediatric patients with moderate-to-severe atopic**  
4 **dermatitis (PEDISTAD): study objectives, design and methodology: a study protocol**  
5  
6  
7  
8  
9

10 Amy S Paller,<sup>1</sup> Emma Guttman-Yassky,<sup>2</sup> Alan D Irvine,<sup>3,4</sup> Eulalia Baselga,<sup>5</sup> Marjolein de Bruin-Weller,<sup>6</sup>  
11  
12 Shyamalie Jayawardena,<sup>7</sup> Annie Zhang,<sup>8</sup> Paola Mina-Osorio,<sup>9</sup> Elena Rizova,<sup>8</sup> Zafer E Ozturk<sup>8</sup>  
13  
14  
15

16  
17 **Affiliations**

18  
19 <sup>1</sup>Northwestern University Feinberg School of Medicine, Chicago, IL, USA

20  
21 <sup>2</sup>Icahn School of Medicine at Mount Sinai Medical Center, New York, NY, USA

22  
23 <sup>3</sup>Trinity College Dublin, Dublin, Ireland

24  
25 <sup>4</sup>National Children's Research Centre, Our Lady's Children's Hospital Crumlin, Dublin, Ireland

26  
27 <sup>5</sup>Hospital de la Santa Creu i Sant Pau, Barcelona, Spain

28  
29 <sup>6</sup>University Medical Center Utrecht, Utrecht, Netherlands

30  
31 <sup>7</sup>Sanofi, Bridgewater, NJ, USA

32  
33 <sup>8</sup>Sanofi Genzyme, Cambridge, MA, USA

34  
35 <sup>9</sup>Regeneron Pharmaceuticals, Inc., Tarrytown, NY, USA  
36  
37  
38

39 **Correspondence to**

40  
41 Amy S Paller, MD; Professor and Chair, Department of Dermatology  
42

43 **Address:**

44  
45 Northwestern University Feinberg School of Medicine

46  
47 676 N. St. Clair, Suite 1600

48  
49 Chicago, IL 60611

50  
51 **Telephone:** 001 312-695-3721

52  
53 **E-mail:** [APaller@nm.org](mailto:APaller@nm.org)  
54  
55  
56  
57

**ORCID ID:**

Amy Paller: 0000-0001-6187-6549

Emma Guttman-Yassky: 0000-0002-9363-324X

Alan Irvine: 0000-0002-9048-2044

Eulalia Baselga: 0000-0003-1086-8439

Marjolein de Bruin-Weller: 0000-0002-1249-6993

Paola Mina-Osorio: 0000-0003-2986-9642

**Journal:** BMJ Open

**Article type:** Study protocol

**ClinicalTrials.gov identifier:** NCT03687359

**Manuscript word count:** 2,034 (4,000 word limit, excluding title page, abstract, tables, acknowledgements, contributions and references)

**Abstract word count:** 269 (300 word limit)

**References:** 14

**Figures:** 2

**Tables:** 4

## ABSTRACT

**Introduction:** Atopic dermatitis (AD) is a chronic inflammatory skin disease often associated with atopic comorbidities and has significant impact on children and their families. There is a lack of robust and longitudinal long-term data on disease characteristics and typical clinical practice with currently available treatments in children with moderate-to-severe AD. Hence, an observational study is needed to evaluate AD characteristics and progression in paediatric patients with moderate-to-severe AD.

**Methods and analysis:** Pediatric Study in Atopic Dermatitis (PEDISTAD) is a prospective, observational, longitudinal study in paediatric patients with moderate-to-severe AD who are currently receiving systemic or topical treatment and whose disease is not adequately controlled by topical prescription therapies or for whom those therapies are not medically advisable. 1300 children at 100–150 sites in approximately 20 countries worldwide will be enrolled and followed for 5 years. AD therapy is at the discretion of the investigator. Data collected will include: AD disease characteristics and comorbidities; current therapy for AD and initiation of new treatments/changes in current treatment; patient-/caregiver-reported outcomes; days missed from school/work for the patient/caregiver; healthcare professional visits; safety; and biomarkers.

**Ethics and dissemination:** This study is conducted in accordance with the principles established by the 18th World Medical Assembly and all subsequent amendments and the guidelines for Good Epidemiology Practice. Each individual country assures that ethics approval has been received and local regulatory requirements are met. Ethics approval has been obtained in all countries currently participating in PEDISTAD. Study data will be disseminated in manuscripts submitted to peer-reviewed medical journals as well as in abstracts submitted to congresses, and in the resulting posters and presentations.

ClinicalTrials.gov Identifier: NCT03687359.

**Key words:** atopic dermatitis, observational, paediatric, systemic treatment

### Strengths and limitations of this study

- PEDISTAD is a multinational, observational, longitudinal study in a large cohort of paediatric patients with moderate-to-severe atopic dermatitis (AD) that will collect long-term data on patient and disease characteristics, progression of disease, selected atopic comorbidities, real-world treatment patterns, efficacy and safety.
- Previous observational studies in patients with AD have not focused on moderate-to-severe disease leading to a gap in knowledge that will be addressed by this study.
- The observational nature of the study limits the robustness of the collected data compared to that obtained from blinded studies with control groups.
- Challenges of the study include patient recruitment in multiple countries and retention of patients through the observation period of 5 years, both of which can be difficult in young children.



## INTRODUCTION

Atopic dermatitis (AD) is a chronic inflammatory skin disease often associated with atopic comorbidities.[1,2] Due to lack of standardised diagnostic criteria and outcome measures of disease severity, there is variability in the reported prevalence rates of AD in children.

AD profoundly affects the quality of life of children and family members.[3] Itching can affect mood and sleep quality, and the chronic relapsing nature of AD has a detrimental impact on the quality of life of the family.[3] Children with AD may also have symptoms of anxiety and depression.[4]

Limited treatment options are available for children with moderate-to-severe AD and primarily include topical corticosteroids, topical calcineurin inhibitors, topical crisaborole and systemic immunosuppressants.[5-8] Most systemic agents are broadly immunosuppressive, used off-label and are not currently approved for use in children. In general, they do not provide a favourable long-term benefit–risk profile for paediatric patients with AD inadequately controlled by topical therapies. Furthermore, disease can often rebound after cessation of systemic therapy, especially after administration of systemic cyclosporine.[9]

There is a lack of robust and longitudinal long-term data related to disease characteristics and typical clinical practice with currently available treatments in children. Hence, an observational study is necessary to evaluate the characteristics of paediatric patients with moderate-to-severe AD whose disease is not adequately controlled with topical therapies or when those therapies are not medically advisable.

The Pediatric Study in Atopic Dermatitis (PEDISTAD) aims to address the substantial need for a better understanding of AD characteristics and progression, including patient and caregiver burden, in paediatric patients with moderate-to-severe AD who initiate, or are candidates for, systemic therapy. The study will document patient characteristics, patient- and caregiver-reported outcomes, AD progression, and atopic comorbidities and assess the effectiveness and safety of therapies (systemic and

1  
2  
3 topical) while describing real-world treatment patterns over a 5-year period. A biomarker sub-study will  
4  
5 analyze the association between biomarkers and disease state and time course of AD in a subset of  
6  
7 PEDISTAD study participants. Here we describe the objectives, design and endpoints of the PEDISTAD.  
8  
9  
10  
11

## 12 **METHODS AND ANALYSIS**

13  
14 PEDISTAD is an international, multicentre, longitudinal, prospective, non-interventional study designed  
15  
16 to describe the disease life course and comorbidities of paediatric patients with moderate-to-severe AD  
17  
18 whose disease is not adequately controlled with topical therapies or for whom those therapies are not  
19  
20 medically advisable (NCT03687359, study OBS15333, protocol version 1, 01 May 2018 and sub-study  
21  
22 LPS15496, protocol version 1, 10 April 2018). Current participating sites are listed in the Clinicaltrials.Gov  
23  
24 record.  
25  
26  
27  
28  
29

### 30 **Patients**

31  
32 This study will enrol a balanced number of patients aged <2 years, ≥2 to <6 years and ≥6 to <12 years at  
33  
34 baseline. Enrolment quotas with respect to treatment types (systemic vs topical) may be imposed to  
35  
36 ensure target numbers of patients in each treatment category. To minimise patient selection bias, all  
37  
38 eligible patients at each selected site should be invited to participate in this registry, until the global  
39  
40 enrolment goal or the site enrolment limit is met.  
41  
42  
43

44 AD therapy prescribed to patients who are enrolled in the study is not dictated per study protocol,  
45  
46 and the therapeutic drug prescription is decided by the medical judgement of the study investigator.  
47  
48 Patients may begin treatment with therapies that become commercially available during the course of  
49  
50 the study.  
51

52 Inclusion and exclusion criteria are reported in table 1. Briefly, patients are eligible for the study if  
53  
54 they are <12 years of age at baseline, have investigator-assessed moderate-to-severe disease and are  
55  
56  
57

1  
2  
3 either receiving systemic treatment for AD (including biologics (currently used off-label), UV therapy,  
4  
5 and immunomodulators such as cyclosporine, azathioprine, methotrexate, mycophenolate mofetil, and  
6  
7 corticosteroids) or are currently on topical treatment but would otherwise be candidates for systemic  
8  
9 therapy (systemic therapies do not include systemic antihistamines).  
10  
11  
12  
13

14 **Table 1** Inclusion and exclusion criteria  
15

|                                     |                                                                                                                                                                                                                                                                                                                                                                                                                                                                                                                                                                                                                                                                                                                                                                                                                                                                                                                                                                     |
|-------------------------------------|---------------------------------------------------------------------------------------------------------------------------------------------------------------------------------------------------------------------------------------------------------------------------------------------------------------------------------------------------------------------------------------------------------------------------------------------------------------------------------------------------------------------------------------------------------------------------------------------------------------------------------------------------------------------------------------------------------------------------------------------------------------------------------------------------------------------------------------------------------------------------------------------------------------------------------------------------------------------|
| <p>16 <b>Inclusion criteria</b></p> | <ul style="list-style-type: none"> <li>• Male or female &lt;12 years of age at baseline</li> <li>• Patients with moderate-to-severe AD according to the investigator's assessment</li> <li>• Treatment             <ul style="list-style-type: none"> <li>— Currently receiving systemic treatment (including biologics (currently used off-label), UV therapy, cyclosporine, azathioprine, methotrexate, mycophenolate mofetil, and corticosteroids) for AD or</li> <li>— Currently on topical treatment, but otherwise candidates for systemic treatment due to                 <ul style="list-style-type: none"> <li>▪ Lack of adequate control and/or</li> <li>▪ Safety concern with long-term topical treatment</li> </ul> </li> </ul> </li> <li>• Signed informed consent by the parent/legally acceptable representative and assent by the patient appropriate to the patient's age, including willingness to participate in long-term follow-up</li> </ul> |
| <p>42 <b>Exclusion criteria</b></p> | <ul style="list-style-type: none"> <li>• Concurrent participation in an interventional clinical trial that modifies patient care</li> </ul>                                                                                                                                                                                                                                                                                                                                                                                                                                                                                                                                                                                                                                                                                                                                                                                                                         |

46 AD, atopic dermatitis.  
47  
48  
49  
50  
51

## 52 **Patient and public involvement**

53  
54 Patients and the public were not involved in the design of this study.  
55  
56  
57

### Study locations and timings

Approximately 100–150 sites in approximately 20 countries are expected to enrol 1300 patients (figure 1). Patient enrolment is expected to take 2 years, and the study duration for each patient is 5 years. A total of 12 visits are planned for each enrolled patient. The study began on 28 September 2018 and is expected to be completed in September 2025.

### Study endpoints and data collection

The primary and secondary objectives of the PEDISTAD are reported in table 2.

**Table 2** Primary and secondary objectives

|                             |                                                                                                                                                                                                                                                                                                                                           |
|-----------------------------|-------------------------------------------------------------------------------------------------------------------------------------------------------------------------------------------------------------------------------------------------------------------------------------------------------------------------------------------|
| <b>Primary objectives</b>   | <ul style="list-style-type: none"> <li>• To describe the characteristics of pediatric patients with moderate to severe AD whose disease is not adequately controlled with topical therapies or when those therapies are not medically advisable</li> <li>• To evaluate the time course of AD and selected atopic comorbidities</li> </ul> |
| <b>Secondary objectives</b> | <ul style="list-style-type: none"> <li>• To characterize disease burden and unmet need</li> <li>• To describe real-world treatment patterns (e.g., dosing regimens, treatment duration, and reasons for discontinuation and/or switching)</li> <li>• To document the real-world effectiveness and safety of treatments</li> </ul>         |

AD, atopic dermatitis.

Data collected will include: demographics; AD disease characteristics at baseline; the presence of selected comorbidities at baseline; time course of conditions including AD; current therapy for AD and initiation of new treatments/changes in current treatment over time; severity of disease at baseline and

over the follow-up period (as assessed by Eczema Area and Severity Index (EASI) and Body Surface Area (BSA) percentage affected by atopic dermatitis, which the study investigators can use to assess disease severity at baseline); patient-/caregiver-reported outcomes at baseline and over the follow-up period; days missed from school for the patient and days missed from work for the primary caregiver due to AD; visits to healthcare professionals; disease state and evolution of selected atopic comorbid conditions; and photography of a representative area affected by AD at select centres and safety. The association between biomarkers and disease state and time course of AD will be examined by a biomarker sub-study collecting blood samples for analysis of protein and RNA biomarkers and cheek swabs for DNA genomic biomarkers. The data being collected in PEDISTAD are summarised in table 3, and the timings for data collection are shown in figure 2.

**Table 3** Data being collected in PEDISTAD

| Type                                        | Collected data                                                                                                                                                                                                                                                                                                                                                                                                                                                                                                                           |
|---------------------------------------------|------------------------------------------------------------------------------------------------------------------------------------------------------------------------------------------------------------------------------------------------------------------------------------------------------------------------------------------------------------------------------------------------------------------------------------------------------------------------------------------------------------------------------------------|
| <b>Patient and disease characteristics</b>  | <ul style="list-style-type: none"> <li>• Patient demographics and medical history</li> <li>• Personal and family history of AD and selected atopic comorbidities</li> <li>• Prior and concomitant medications for AD and comorbidities—all prior systemic therapy ever used, all topical and UV therapy in the previous 3 months as well as treatment(s) for other diseases including name, dose, route, frequency and start/stop date</li> <li>• Selected comorbidity presence throughout the study (as diagnosed by an HCP)</li> </ul> |
| <b>Patient-/caregiver-reported outcomes</b> | <ul style="list-style-type: none"> <li>• POEM</li> <li>• CDLQI/IDQOL</li> <li>• DFI</li> <li>• Peak Pruritus NRS/Worst scratching NRS</li> </ul>                                                                                                                                                                                                                                                                                                                                                                                         |

|                                                     |                                                                                                                                                                                                                                                                                      |
|-----------------------------------------------------|--------------------------------------------------------------------------------------------------------------------------------------------------------------------------------------------------------------------------------------------------------------------------------------|
|                                                     | <ul style="list-style-type: none"> <li>• CGAD</li> <li>• Days missed from school for the patient and days missed from work for the primary caregiver due to AD since last visit</li> <li>• TNSS</li> </ul>                                                                           |
| <b>Physician assessments of AD disease activity</b> | <ul style="list-style-type: none"> <li>• EASI</li> <li>• BSA (%) affected by AD</li> </ul>                                                                                                                                                                                           |
| <b>Safety data</b>                                  | <ul style="list-style-type: none"> <li>• All adverse events regardless of seriousness</li> </ul>                                                                                                                                                                                     |
| <b>Other data</b>                                   | <ul style="list-style-type: none"> <li>• Visits to HCPs—type of HCP and reason for the visit</li> <li>• Investigator specialty and setting</li> <li>• Photography of a representative area affected by AD—optional (at select centres)</li> <li>• Reason for end of study</li> </ul> |
| <b>Biomarker data</b>                               | <ul style="list-style-type: none"> <li>• Serial blood samples for protein and RNA expression</li> <li>• Cheek swabs for DNA genomic biomarkers</li> </ul>                                                                                                                            |

AD, atopic dermatitis; BSA, body surface area; CGAD, Caregiver Global Assessment of Disease; CDLQI, Children's Dermatology Life Quality Index; DFI, Dermatitis Family Impact; EASI, Eczema Area and Severity Index; HCP, healthcare professional; IDQOL, Infant's Dermatitis Quality of Life; NRS, Numerical Rating Scale; POEM, Patient-Oriented Eczema Measure; TNSS, Total Nasal Symptom Score.

## Statistical analysis

### Sample size

To ensure that approximately 930 patients complete the 5-year follow-up, approximately 1300 patients will be enrolled (about 435 in each age group). A sample of approximately 310 participants per age group will ensure a maximum width for the confidence interval of 11% for the estimates based on binary endpoints (table 4). This sample size needed requires that a total of 930 patients complete the study.

The biomarker sub-study will be conducted in approximately 300 participants (100 participants within

each age cohort), whose sample size is based empirically on the results of a previous biomarker study with similar objectives.[10]

**Table 4** Precision estimates for the overall population

| <b>Width of the 95% CI</b> | <b>Overall population<br/>N=930</b> | <b>33% of overall population<br/>N=310</b> |
|----------------------------|-------------------------------------|--------------------------------------------|
| Binary data—widest width   | 6.4%                                | 11.1%                                      |
| Normal data                | 0.13 SD                             | 0.22 SD                                    |

CI, confidence interval; SD, standard deviation.

#### Analysis

All statistical analyses will be performed descriptively with no hypothesis testing. Patient- and care-giver reported outcomes will be summarised within each age cohort, as many are age-based assessments.

Continuous data will be described using summary statistics, including arithmetic mean, standard deviation, median and range, while categorical data will be summarised using counts and percentages.

#### ETHICS AND DISSEMINATION

This study is being conducted in accordance with the principles established by the 18th World Medical Assembly and all subsequent amendments and in accordance with the guidelines for Good Epidemiology Practice. Each participating country should locally ensure all necessary regulatory submissions (for example, Institutional Review Board/Institutional Ethics Committee) are performed in accordance with local regulations, including local data protection regulations. Ethics approval has been obtained in all countries currently participating in PEDISTAD. A list of all ethics approvals received as of 20 December 2019 is provided as supplementary file.

1  
2  
3 The study team and the study steering and scientific committees are responsible for study reporting and  
4 interpretation, including interim data analyses and sub-group analyses. The data from the PEDISTAD  
5 study will be disseminated in manuscripts for submission to peer-reviewed medical journals as well as in  
6 abstracts for submission to congresses and in the resulting posters and presentations. The final decision  
7 to publish will be made by the study scientific steering committee after prior notice to the sponsor to  
8 allow for its internal review and comments.  
9  
10  
11  
12  
13  
14  
15  
16  
17  
18

## 19 **DISCUSSION**

20  
21 The PEDISTAD study aims to address the lack of robust and longitudinal long-term data related to AD  
22 characteristics, disease progression, development of comorbidities and the typical clinical practice with  
23 currently available treatments in children with AD. By collecting information about clinical  
24 characteristics, including patient- and care-giver reported outcomes, physician-assessed clinical severity,  
25 safety of currently used medicines and photographs of a representative area affected by AD (at select  
26 centres), over time, the PEDISTAD study aims to bridge this knowledge gap. A biomarker sub-study of  
27 PEDISTAD will analyze the association between biomarkers and disease state and time course of AD in a  
28 sub-set of PEDISTAD study participants.  
29  
30  
31  
32  
33  
34  
35  
36  
37  
38

39 There are various disease trajectories in paediatric patients with AD, and clinical presentation varies  
40 with different ages of onset and development of comorbid atopic conditions.[11,12] Patients in this  
41 study will, hence, be recruited into 3 age cohorts (<2 years, ≥2 to <6 years and ≥6 to <12) and followed  
42 for 5 years.  
43  
44  
45  
46  
47

48 The PEDISTAD is a real-world study and, therefore, strict entry criteria are not set. Enrolling  
49 physicians are enabled to use their best judgement as to whether a patient meets the inclusion criteria  
50 of moderate-to-severe AD using the assessment(s) of their choice. Physician assessment of disease  
51 severity will be collected by Eczema Area and Severity Index (EASI) and Body Surface Area (BSA)  
52  
53  
54  
55  
56  
57



1  
2  
3 percentage affected by atopic dermatitis, which the study investigators can use to assess disease  
4  
5 severity at baseline. These assessments can also later be used to assess disease severity in patients over  
6  
7 time. Other objective measures of severity may be unfamiliar to clinicians who do not regularly  
8  
9 participate in clinical trials in atopic dermatitis, and a lack of familiarity may potentially diminish the  
10  
11 reliability of their results.  
12  
13

14 A significant proportion of children have persistent disease;<sup>[12,13]</sup> thus, treatment approaches that  
15  
16 are effective and tolerated over large timespans are desired. The observational and long-term nature of  
17  
18 the PEDISTAD study serves to better understand the long-term evolution of disease burden in patients  
19  
20 and caregivers as well as to identify any unmet therapeutic need for moderate-to-severe AD.  
21  
22

23 Although there are no universal definitions of recalcitrance in AD patients, expert recommendations  
24  
25 mention that failure to respond to adequate topical therapy, a need for prolonged use of high-potency  
26  
27 topical steroids or repeated flares are suggestive of recalcitrance and make a patient eligible for  
28  
29 systemic therapy.<sup>[14]</sup> This observational study will provide insight into the characteristics of paediatric  
30  
31 patients initiated on or who become candidates for systemic therapy to better define when systemic  
32  
33 therapy is warranted.  
34  
35

36 Paediatric AD presents clinically with a high degree of heterogeneity. In addition to the clinical  
37  
38 phenotype, biomarkers and endophenotypes are now considered fundamental to stratify complex  
39  
40 diseases into subgroups for which more tailored prevention and therapeutic strategies can be  
41  
42 developed. Due to the waxing and waning nature of AD and the fact that it can present throughout a  
43  
44 lifetime with long periods of remission in some individuals, the ability to predict disease exacerbations  
45  
46 or the appearance of associated atopic conditions using biomarkers could have a great impact in the  
47  
48 ability to manage the disease for long-term control. For this reason, a biomarker substudy in parallel  
49  
50 with the PEDISTAD study will collect blood samples with the objectives of exploring associations  
51  
52  
53  
54  
55  
56  
57  
58  
59  
60

1  
2  
3 between biomarkers of AD and disease state and time course of AD; disease state and evolution of  
4 selected atopic comorbid conditions; and effectiveness of specific AD treatments.  
5  
6

7  
8 Observational studies in patients with AD to date have been limited by a variety of factors, including  
9 number of participants, participating countries and the extent and duration of data collection. The  
10 PEDISTAD study aims to address all these issues. Furthermore, the PEDISTAD study will be the largest  
11 study to date in a paediatric population with moderate-to-severe AD; by not focusing on  
12 moderate-to-severe disease, other observational studies may have underestimated the risk of  
13 comorbidities and disease persistence in this patient population.  
14  
15  
16  
17  
18  
19  
20

21 Limitations of the PEDISTAD study include the open-label observational nature; thus, the collected  
22 data may not be as robust as blinded studies with control groups. However, the challenges of running  
23 long-term controlled studies, especially in this age group, are well known, and a control group may not  
24 be crucial to fulfil the objectives of this study. Therefore, the data from this study are anticipated to be  
25 highly valuable. Challenges include patient recruitment in multiple countries and sites and retention of  
26 patients in this age group for up to 5 years, which is particularly difficult in very young children. Parental  
27 education will be key to keeping patients enrolled in the study and to provide robust and reliable  
28 patient-, caregiver- and physician-reported outcomes at reasonable intervals.  
29  
30  
31  
32  
33  
34  
35  
36  
37  
38

39 In summary, PEDISTAD will improve our understanding of the long-term evolution of AD, disease  
40 burden in patients and caregivers and the impact of therapy on paediatric patients with  
41 moderate-to-severe AD and their families.  
42  
43  
44  
45  
46  
47  
48  
49  
50  
51  
52  
53  
54  
55  
56  
57  
58  
59  
60

### Competing interests

**ASP:** AbbVie, AnaptysBio, Eli Lilly, Galderma, Incyte, Janssen, LEO Pharma, Novartis, Regeneron

Pharmaceuticals, Inc., Sanofi – investigator; AbbVie, Amgen, Asana, Dermavant, Dermira, Galderma, Eli Lilly, Forte, LEO Pharma, Matrisys Bioscience, Menlo Therapeutics, Morphosys/Galapagos, Novartis, Pfizer, Regeneron Pharmaceuticals, Inc., Sanofi – consultant.

**EG-Y:** AbbVie, Celgene, Eli Lilly, Galderma, GlaxoSmithKline, Glenmark, LEO Pharma, Pfizer, Regeneron Pharmaceuticals, Inc., Sanofi – investigator; AbbVie, Anacor, Asana Biosciences, Daiichi Sankyo, DBV, Dermira, Eli Lilly, Galderma, GlaxoSmithKline, Glenmark, Kiniksa Pharmaceuticals, Kyowa, LEO Pharma, Menlo Therapeutics, Novartis, Pfizer, Realm, Regeneron Pharmaceuticals, Inc., Sanofi – consultant; AbbVie, Celgene, Dermira, Galderma, Innovaderm, Janssen, LEO Pharma, Novartis, Pfizer, Regeneron Pharmaceuticals, Inc., Sanofi – research grants.

**ADI:** AbbVie, Chugai Pharma, Genentech, Janssen, Novartis, Pfizer, Regeneron Pharmaceuticals, Inc., Sanofi Genzyme – consultant.

**EB:** Almirall – speaker; AbbVie, Eli Lilly, Pfizer – investigator; Pierre Fabre Dermatology – investigator, consultant; Regeneron Pharmaceuticals, Inc., Sanofi Genzyme – consultant; Venthera – co-founder, consultant.

**MdeB-W:** Regeneron Pharmaceuticals, Inc., Sanofi Genzyme – investigator, advisory board member, speaker, consultant; AbbVie, Pfizer – investigator, advisory board member; Eli Lilly, UCB – advisory board member

**SJ, AZ, ER, ZEO:** Sanofi – employees, may hold stock and/or stock options in the company.

**PM-O:** Regeneron Pharmaceuticals, Inc. – employee and shareholder.

1  
2  
3 **Funding** This work was supported by Sanofi and Regeneron Pharmaceuticals, Inc. Medical writing and  
4 editorial assistance was provided by Carolyn Ellenberger, PhD, of Excerpta Medica, funded by Sanofi  
5 Genzyme and Regeneron Pharmaceuticals, Inc. Investigators will collect consent forms and data.  
6  
7 Analysis of the data will be performed by the sponsor. The scientific committee of the study will have  
8 full access to the final data allowing for appropriate analysis and reporting of the study results.  
9  
10  
11  
12  
13  
14  
15

### 16 **Contributors to the protocol**

17  
18 ASP, EG-Y, ADI, EB, MdeB-W were involved in design of the study and are active steering committee  
19 members for the study.  
20  
21

22  
23 SJ contributed to the design and development of the protocol and is the statistical lead.  
24

25 AZ, PM-O, ER, ZEO contributed to the design and development of the protocol and are medical leads.  
26

27  
28 All authors critically revised the manuscript, gave final approval of the manuscript, and are accountable  
29 for the accuracy and integrity of the manuscript.  
30  
31  
32  
33  
34  
35  
36  
37  
38  
39  
40  
41  
42  
43  
44  
45  
46  
47  
48  
49  
50  
51  
52  
53  
54  
55  
56  
57  
58  
59  
60

## REFERENCES

1. Shrestha S, Miao R, Wang L, *et al.* Burden of atopic dermatitis in the United States: Analysis of healthcare claims data in the Commercial, Medicare, and Medi-Cal databases. *Adv Ther* 2017;34:1989–2006.
2. Weidinger S, Beck LA, Beiber T, *et al.* Atopic dermatitis. *Nat Rev Dis Primers* 2018;4:1.
3. Ricci G, Bellini F, Dondi A, *et al.* Atopic dermatitis in adolescence. *Dermatol Reports* 2011;4:e1
4. Rønnstad ATM, Halling-Overgaard AS, Hamann CR, *et al.* Association of atopic dermatitis with depression, anxiety, and suicidal ideation in children and adults: A systematic review and meta-analysis. *J Am Acad Dermatol* 2018;79:448–56.
5. Wollenberg A, Oranje A, Deleuran M, *et al.* ETFAD/EADV Eczema task force 2015 position paper on diagnosis and treatment of atopic dermatitis in adult and paediatric patients. *J Eur Acad Dermatol Venereol* 2016;30:729–47.
6. Sidbury R, Tom WL, Bergman JN, *et al.* Guidelines of care for the management of atopic dermatitis: Section 4. Prevention of disease flares and use of adjunctive therapies and approaches. *J Am Acad Dermatol* 2014;71:1218–33.
7. Ring J, Alomar A, Bieber T, *et al.* Guidelines for treatment of atopic eczema (atopic dermatitis) Part II. *J Eur Acad Dermatol Venereol* 2012;26:1176–93.
8. EUCRISA. Highlights of Prescribing Information, FDA 2017.  
[https://www.accessdata.fda.gov/drugsatfda\\_docs/label/2017/207695s002lbl.pdf](https://www.accessdata.fda.gov/drugsatfda_docs/label/2017/207695s002lbl.pdf). (accessed 4 January 2019).
9. Sibbald C, Pope E, Ho N, *et al.* Retrospective review of relapse after systemic cyclosporine in children with atopic dermatitis. *Pediatr Dermatol* 2015;32:36–40.

- 1  
2  
3 10. Thijs JL, Strickland I, Bruijnzeel-Koomen CAFM, *et al.* Moving toward endotypes in atopic  
4 dermatitis: Identification of patient clusters based on serum biomarker analysis. *J Allergy Clin*  
5  
6 *Immunol* 2017;140:730–7.  
7  
8  
9  
10 11. Irvine AD, Mina-Osorio P. Disease trajectories in childhood atopic dermatitis: an update and  
11  
12 practitioner's guide. *Br J Dermatol* doi: 10.1111/bjd.17766. [published Online First 13 February  
13  
14 2019].  
15  
16 12. Paller AS, Spergel JM, Mina-Osorio P, *et al.* The atopic march and atopic multimorbidity: Many  
17  
18 trajectories, many pathways. *J Allergy Clin Immunol* 2019; 143:46–55.  
19  
20 13. Kim JP, Chao LX, Simpson EL, *et al.* Persistence of atopic dermatitis (AD): a systematic review and  
21  
22 meta-analysis. *J Am Acad Dermatol* 2016;75:681–7.  
23  
24  
25 14. Simpson EL, Bruin-Weller M, Flohr C, *et al.* When does atopic dermatitis warrant systemic  
26  
27 therapy? Recommendations from an expert panel of the International Eczema Council. *J Am*  
28  
29 *Acad Dermatol* 2017;77:623–33.  
30  
31  
32  
33  
34  
35  
36  
37  
38  
39  
40  
41  
42  
43  
44  
45  
46  
47  
48  
49  
50  
51  
52  
53  
54  
55  
56  
57  
58  
59  
60

1  
2  
3 **Figure legends**  
4

5 **Figure 1** Patients and study locations  
6

7 **Figure 2** Data collection schedule  
8

9  
10 AD, atopic dermatitis; HCP, healthcare professional.  
11  
12  
13  
14  
15  
16  
17  
18  
19  
20  
21  
22  
23  
24  
25  
26  
27  
28  
29  
30  
31  
32  
33  
34  
35  
36  
37  
38  
39  
40  
41  
42  
43  
44  
45  
46  
47  
48  
49  
50  
51  
52  
53  
54  
55  
56  
57  
58  
59  
60

For peer review only

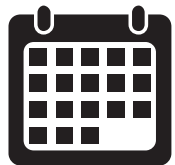

**Total duration:** 5 years

**Enrolment:** 2 years

**Visits:** 12 planned (according to standard of care)

1  
2  
3  
4  
5  
6  
7  
8  
9  
10  
11  
12  
13  
14  
15  
16  
17  
18  
19  
20  
21  
22  
23  
24  
25  
26  
27  
28  
29

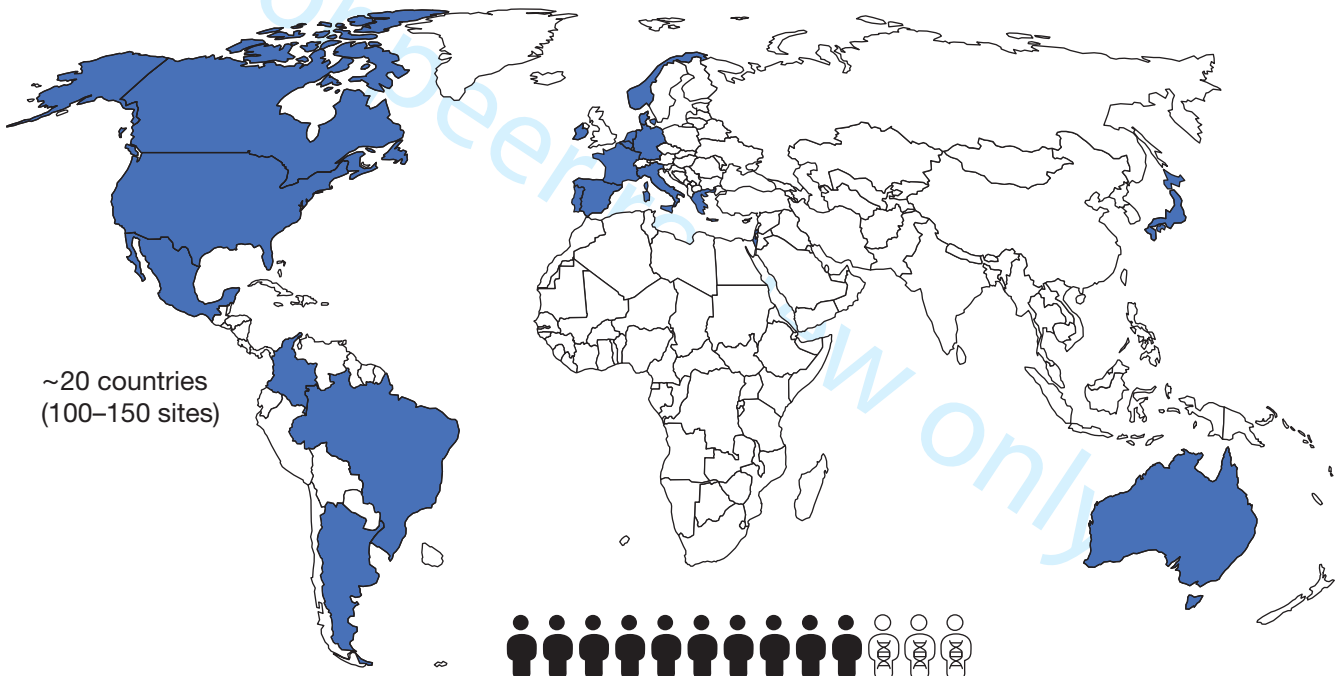

~20 countries  
(100–150 sites)

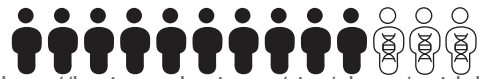

For peer review only - <http://bmjopen.bmj.com/site/about/guidelines.xhtml>  
1,300 patients (300 for biomarker study)



Months 12-54

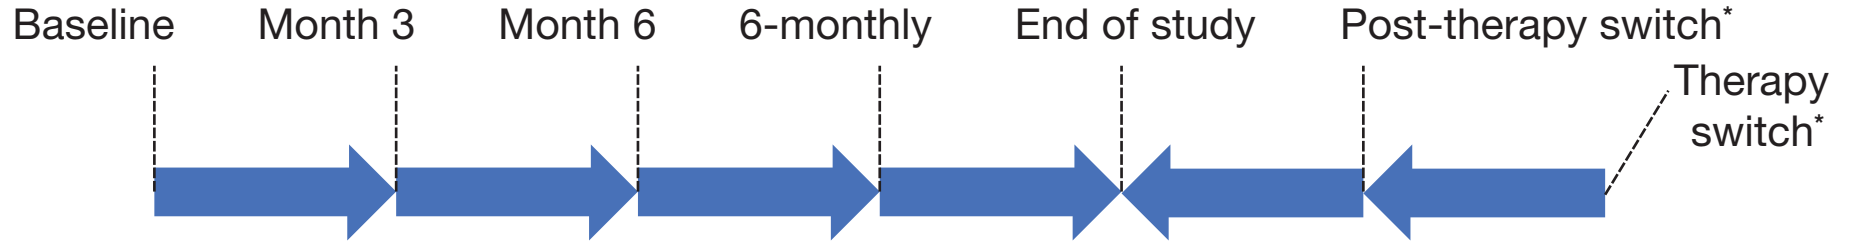

|                                         | Baseline | Month 3 | Month 6 | 6-monthly | End of study | Post-therapy switch* |
|-----------------------------------------|----------|---------|---------|-----------|--------------|----------------------|
| 10 Patient and disease characteristics  |          |         |         |           |              |                      |
| 14 Physician assessments of AD activity |          |         |         |           |              |                      |
| 18 Patient/caregiver-reported outcomes  |          |         |         |           |              |                      |
| 23 Safety                               |          |         |         |           |              |                      |
| 27 HCP visit                            |          |         |         |           |              |                      |
| 31 Photography (optional)               |          |         |         |           |              |                      |
| 34 Cheek swabs                          |          |         |         |           |              |                      |
| 39 Blood samples†                       |          |         |         |           |              |                      |

For peer review only

| Site Country | Site #  | Name of applicable CEC/LEC/CIRB/LIRB                                                               |
|--------------|---------|----------------------------------------------------------------------------------------------------|
| Argentina    | 0320001 | Comité de Ética en Farmacología Clínica de la Fundación CIDEA                                      |
| Argentina    | 0320002 | Comité de Ética de Protocolos de Investigación (CEPI)                                              |
| Argentina    | 0320003 | Comite de Etica Dr Carlos Barclay                                                                  |
| Argentina    | 0320004 | Comité de Ética "Dr. Claude Bernard"                                                               |
| Argentina    | 0320005 | Comité de Ética en Investigación del Hospital de Niños Pedro de Elizalde                           |
| Argentina    | 0320006 | Comite de Etica en Investigacion                                                                   |
| Australia    | 0360003 | The Royal Children's Hospital Research Ethics and Governance                                       |
| Australia    | 0360004 | Bellberry Human Research Ethics Committee                                                          |
| Australia    | 0360006 | Bellberry Human Research Ethics Committee                                                          |
| Australia    | 0360007 | Epworth Research Development and Governance Unit (RDGU)                                            |
| Australia    | 0360008 | Bellberry Human Research Ethics Committee                                                          |
| Australia    | 0360009 | South Western Sydney Local Health District Human Research Ethics Committee                         |
| Australia    | 0360010 | The Eastern Health Office of Research and Ethics                                                   |
| Belgium      | 0560001 | Comité d`Éthique Hospitalo-Facultaire Saint-Luc UCL                                                |
| Belgium      | 0560002 | Comité d`Éthique Hospitalo-Facultaire Saint-Luc UCL                                                |
| Belgium      | 0560003 | Comité d`Éthique Hospitalo-Facultaire Saint-Luc UCL                                                |
| Belgium      | 0560004 | Comité d`Éthique Hospitalo-Facultaire Saint-Luc UCL                                                |
| Brazil       | 0760001 | COMITÊ DE ÉTICA EM PESQUISA INVESTIGA - INSTITUTOS DE PESQUISAS                                    |
| Brazil       | 0760002 | COMITÊ DE ÉTICA EM PESQUISA DO HOSPITAL DA CRIANÇA SANTO ANTÔNIO                                   |
| Brazil       | 0760003 | COMITÊ DE ÉTICA EM PESQUISA EM SERES HUMANOS DO COMPLEXO HOSPITAL DE CLÍNICAS DA UFPR              |
| Brazil       | 0760004 | COMITÊ DE ÉTICA EM PESQUISA EM SERES HUMANOS DO COMPLEXO HOSPITAL DE CLÍNICAS DA UFPR              |
| Brazil       | 0760005 | COMITÊ DE ÉTICA EM PESQUISA EM SERES HUMANOS DO COMPLEXO HOSPITAL DE CLÍNICAS DA UFPR              |
| Brazil       | 0760006 | COMITÊ DE ÉTICA EM PESQUISA DA UNIFESP                                                             |
| Canada       | 1240001 | Western Institutional Review Board (WIRB)                                                          |
| Canada       | 1240002 | Western Institutional Review Board (WIRB)                                                          |
| Canada       | 1240003 | Health Research Ethics Board of Alberta - Community Health Committee (HREBA CHC)                   |
| Canada       | 1240004 | Health Research Ethics Board of Alberta - Community Health Committee (HREBA CHC)                   |
| Canada       | 1240005 | Western Institutional Review Board (WIRB)                                                          |
| Canada       | 1240006 | CHU Sainte-Justine                                                                                 |
| Canada       | 1240007 | Conjoint Health Research Ethics Board                                                              |
| Colombia     | 1700001 | Comité de Ética en Investigación con Seres Humanos de la Fundación Hospital Infantil Universitario |
| Colombia     | 1700004 | Comité Institucional de Ética en Investigación C.I.E.I CAFAM                                       |
| Colombia     | 1700006 | Comite de Etica en Investigacion del area de la Salud de la Universidad del Norte                  |
| Colombia     | 1700007 | Comite de Etica de la Investigacion Riesgo de Fractura S.A.                                        |
| France       | 2500001 | COMITE DE PROTECTION DES PERSONNES Ile de France 1                                                 |
| France       | 2500002 | COMITE DE PROTECTION DES PERSONNES Ile de France 1                                                 |
| France       | 2500003 | COMITE DE PROTECTION DES PERSONNES Ile de France 1                                                 |
| France       | 2500004 | COMITE DE PROTECTION DES PERSONNES Ile de France 1                                                 |
| France       | 2500005 | COMITE DE PROTECTION DES PERSONNES Ile de France 1                                                 |
| France       | 2500006 | COMITE DE PROTECTION DES PERSONNES Ile de France 1                                                 |
| France       | 2500008 | COMITE DE PROTECTION DES PERSONNES Ile de France 1                                                 |
| France       | 2500009 | COMITE DE PROTECTION DES PERSONNES Ile de France 1                                                 |
| France       | 2500010 | COMITE DE PROTECTION DES PERSONNES Ile de France 1                                                 |
| Greece       | 3000001 | Scientific Council of Hospital of Venereal & Skin Diseases of Athens "Andreas Syggros"             |
| Greece       | 3000002 | Scientific Council of General Hospital of Thessaloniki "Papageorgiou"                              |
| Greece       | 3000003 | Scientific Council of General Hospital of Thessaloniki "Ippokratio"                                |
| Greece       | 3000004 | Scientific Council of University General Hospital of Larissa                                       |

|    |             |         |                                                                                                                                                                   |
|----|-------------|---------|-------------------------------------------------------------------------------------------------------------------------------------------------------------------|
| 1  |             |         |                                                                                                                                                                   |
| 2  | Israel      | 3760001 | Institutional Helsinki Committee of Sheba Medical Center                                                                                                          |
| 3  | Israel      | 3760002 | Institutional Helsinki Committee of Kaplan Medical Center                                                                                                         |
| 4  | Israel      | 3760003 | Institutional Helsinki Committee of Soroka Medical Center                                                                                                         |
| 5  | Israel      | 3760004 | Institutional Helsinki Committee of Bnei Zion Medical Center                                                                                                      |
| 6  | Israel      | 3760005 | Institutional Helsinki Committee of Meir Medical Center                                                                                                           |
| 7  | Italy       | 3800001 | Comitato Etico Milano Area 2                                                                                                                                      |
| 8  | Italy       | 3800003 | Comitato Etico di Area Vasta Emilia Centro della Regione Emilia-Romagna (CE-AVEC)                                                                                 |
| 9  | Italy       | 3800004 | Comitato Etico "Lazio 2"                                                                                                                                          |
| 10 | Italy       | 3800005 | Comitato Etico Università degli Studi della Campania "Luigi Vanvitelli" - Azienda Ospedaliera<br>Universitaria "Luigi Vanvitelli - AORN "Ospedali dei Colli"      |
| 11 | Italy       | 3800007 | Comitato Etico Unico Regionale (CEUR) del Friuli Venezia Giulia                                                                                                   |
| 12 | Italy       | 3800009 | CER UMBRIA                                                                                                                                                        |
| 13 | Italy       | 3800010 | Comitato Etico Catania 1                                                                                                                                          |
| 14 | Italy       | 3800012 | Comitato Etico Interregionale                                                                                                                                     |
| 15 | Japan       | 3920001 | Ethical Committee of National Center for Child Health and Development                                                                                             |
| 16 | Japan       | 3920002 | Ethical Committee of Hiroshima University Hospital                                                                                                                |
| 17 | Japan       | 3920003 | Ethical Committee of Osaka Habikino Medical Center                                                                                                                |
| 18 | Japan       | 3920004 | Ethical Committee of University Hospital Kyoto Prefectural University of Medicine                                                                                 |
| 19 | Japan       | 3920005 | Ethical Committee of Kinki University Hospital                                                                                                                    |
| 20 | Japan       | 3920008 | Ethical Committee of Aichi Children's Health and Medical Center                                                                                                   |
| 21 | Japan       | 3920009 | IRB of Sagamihara Hospital (受託研究委員会)                                                                                                                              |
| 22 | Japan       | 3920011 | Ethical Committee of Tokyo Metropolitan Children's Medical Center                                                                                                 |
| 23 | Japan       | 3920014 | IRB of Tohoku Medical and Pharmaceutical University Hospital ( 治験審査委員会 )                                                                                          |
| 24 | Mexico      | 4840001 | Comite de Investigacion del Instituto Nacional de Pediatria<br>Comite de Ética en Investigacion del Instituto Nacional de Pediatria                               |
| 25 | Mexico      | 4840003 | Comité de Investigación del Hospital Universitario José Eleuterio González<br>Comité de Ética en Investigación del Hospital Universitario José Eleuterio González |
| 26 | Mexico      | 4840004 | Comite de Etica en Investigacion del Hospital Hispano, S.A. de C.V.<br>Comité de Investigación del Hospital Hispano, S.A. de C.V.                                 |
| 27 | Mexico      | 4840005 | Comité de Investigación de Clinical Research Institute S.C.<br>Comité de Ética en Investigación de Chirurgie & Medical                                            |
| 28 | Mexico      | 4840006 | Comité de Investigacion del Hospital Infantil de Mexico Federico Gomez<br>Comité de Ética en Investigacion del Hospital Infantil de Mexico Federico Gomez         |
| 29 | Mexico      | 4840007 | Comité de Investigación del Hospital Hispano, S.A. de C.V.<br>Comite de Ética en Investigacion del Hospital Hispano, S.A. de C.V.                                 |
| 30 | Netherlands | 5280001 | Regionale Toetsingscommissie Patientgebonden Onderzoek                                                                                                            |
| 31 | Netherlands | 5280002 | Regionale Toetsingscommissie Patientgebonden Onderzoek                                                                                                            |
| 32 | Netherlands | 5280003 | Regionale Toetsingscommissie Patientgebonden Onderzoek                                                                                                            |
| 33 | Netherlands | 5280005 | Regionale Toetsingscommissie Patientgebonden Onderzoek                                                                                                            |
| 34 | Netherlands | 5280006 | Regionale Toetsingscommissie Patientgebonden Onderzoek                                                                                                            |
| 35 | Norway      | 5780001 | Regionale komiteer for medisinsk og helsefaglig forskningsetikk Sør-Øst                                                                                           |
| 36 | Norway      | 5780002 | Regionale komiteer for medisinsk og helsefaglig forskningsetikk Sør-Øst                                                                                           |
| 37 | Portugal    | 6200001 | Comissão de Ética do Centro Académico de Medicina de Lisboa                                                                                                       |
| 38 | Portugal    | 6200004 | Comissão de Ética do Hospital Pedro Hispano                                                                                                                       |
| 39 | Portugal    | 6200005 | Comissão de Ética do Centro Hospitalar Universitário Lisboa Central                                                                                               |
| 40 | Spain       | 7240001 | CEIm Departamento de Salud de Alicante - Hospital General ISABIAL - FISABIO                                                                                       |
| 41 | Spain       | 7240002 | Comité de Ética de la Investigación con Medicamentos del Hospital de la Santa Creu i Sant Pau                                                                     |
| 42 | Spain       | 7240003 | Comité Ético de Investigación con Medicamentos del Hospital General Universitario Gregorio Marañón                                                                |
| 43 | Spain       | 7240004 | Comité Ético del Instituto de Investigación del Hospital Universitario La Paz                                                                                     |
| 44 | Spain       | 7240005 | Comité de Ética de la Investigación con Medicamentos de LA Fundación Sant Joan de Dèu                                                                             |
| 45 | Spain       | 7240007 | Consejería de Sanidad y Familias - Secretaría General de Investigación, Desarrollo e Innovación en<br>Salud de la Junta de Andalucía                              |
| 46 | Spain       | 7240008 | Comité de Ética de la Fundación de Investigación del Hospital General Universitario de Valencia                                                                   |
| 47 | Spain       | 7240009 | Consejería de Sanidad - Gobierno del Principado de Asturias (CEIm regional)                                                                                       |

|    |               |         |                                                                                                            |
|----|---------------|---------|------------------------------------------------------------------------------------------------------------|
| 1  | United States | 8400001 | The Ann & Robert H. Lurie Children's Hospital of Chicago Institutional Review Board (Lurie Children's IRB) |
| 2  | United States | 8400003 | Western Institutional Review Board (WIRB)                                                                  |
| 3  | United States | 8400005 | Western Institutional Review Board (WIRB)                                                                  |
| 4  | United States | 8400006 | Western Institutional Review Board (WIRB)                                                                  |
| 5  | United States | 8400007 | Western Institutional Review Board (WIRB)                                                                  |
| 6  | United States | 8400008 | Children's Hospital of Wisconsin IRB                                                                       |
| 7  | United States | 8400010 | Western Institutional Review Board (WIRB)                                                                  |
| 8  | United States | 8400012 | Western Institutional Review Board (WIRB)                                                                  |
| 9  | United States | 8400013 | Medical University of South Carolina IRB                                                                   |
| 10 | United States | 8400015 | Phoenix Children's Hospital (PCH) IRB                                                                      |
| 11 | United States | 8400016 | Western Institutional Review Board (WIRB)                                                                  |
| 12 | United States | 8400017 | Cincinnati Children's Hospital Medical Center IRB                                                          |
| 13 | United States | 8400018 | Western Institutional Review Board (WIRB)                                                                  |
| 14 | United States | 8400020 | Western Institutional Review Board (WIRB)                                                                  |
| 15 | United States | 8400023 | Western Institutional Review Board (WIRB)                                                                  |
| 16 | United States | 8400025 | Western Institutional Review Board (WIRB)                                                                  |
| 17 | United States | 8400026 | Western Institutional Review Board (WIRB)                                                                  |
| 18 | United States | 8400027 | Western Institutional Review Board (WIRB)                                                                  |
| 19 | United States | 8400028 | Western Institutional Review Board (WIRB)                                                                  |
| 20 | United States | 8400029 | Western Institutional Review Board (WIRB)                                                                  |
| 21 | United States | 8400030 | Western Institutional Review Board (WIRB)                                                                  |
| 22 | United States | 8400031 | Western Institutional Review Board (WIRB)                                                                  |
| 23 | United States | 8400032 | Western Institutional Review Board (WIRB)                                                                  |
| 24 | United States | 8400033 | Western Institutional Review Board (WIRB)                                                                  |
| 25 | United States | 8400034 | Western Institutional Review Board (WIRB)                                                                  |
| 26 | United States | 8400035 | Western Institutional Review Board (WIRB)                                                                  |
| 27 | United States | 8400036 | Western Institutional Review Board (WIRB)                                                                  |
| 28 | United States | 8400037 | Western Institutional Review Board (WIRB)                                                                  |
| 29 | United States | 8400038 | Western Institutional Review Board (WIRB)                                                                  |
| 30 | United States | 8400040 | Western Institutional Review Board (WIRB)                                                                  |
| 31 | United States | 8400041 | Western Institutional Review Board (WIRB)                                                                  |
| 32 | United States | 8400042 | Western Institutional Review Board (WIRB)                                                                  |
| 33 | United States | 8400042 | Western Institutional Review Board (WIRB)                                                                  |
| 34 |               |         |                                                                                                            |
| 35 |               |         |                                                                                                            |
| 36 |               |         |                                                                                                            |
| 37 |               |         |                                                                                                            |
| 38 |               |         |                                                                                                            |
| 39 |               |         |                                                                                                            |
| 40 |               |         |                                                                                                            |
| 41 |               |         |                                                                                                            |
| 42 |               |         |                                                                                                            |
| 43 |               |         |                                                                                                            |
| 44 |               |         |                                                                                                            |
| 45 |               |         |                                                                                                            |
| 46 |               |         |                                                                                                            |
| 47 |               |         |                                                                                                            |
| 48 |               |         |                                                                                                            |
| 49 |               |         |                                                                                                            |
| 50 |               |         |                                                                                                            |
| 51 |               |         |                                                                                                            |
| 52 |               |         |                                                                                                            |
| 53 |               |         |                                                                                                            |
| 54 |               |         |                                                                                                            |
| 55 |               |         |                                                                                                            |
| 56 |               |         |                                                                                                            |
| 57 |               |         |                                                                                                            |
| 58 |               |         |                                                                                                            |
| 59 |               |         |                                                                                                            |
| 60 |               |         |                                                                                                            |

| Applicable CEC/LEC/CIRB/LIRB approval date | Approval ID#<br>(enter NA if not given in approval letter) |
|--------------------------------------------|------------------------------------------------------------|
| 28-Dec-18                                  | NA                                                         |
| 22-Nov-18                                  | NA                                                         |
| 12-Oct-18                                  | NA                                                         |
| 26-Nov-18                                  | NA                                                         |
| 30-Apr-19                                  | NA                                                         |
| 31-Oct-18                                  | NA                                                         |
| 26-Jun-19                                  | 38258                                                      |
| 28-Oct-19                                  | 2018-11-1009-AA (Application number on approval letter)    |
| 04-Dec-19                                  | 2018-11-1009-AB (Application number on approval letter)    |
| 19-Nov-19                                  | EH2019-469 (Application number on approval letter)         |
| 10-Oct-19                                  | 2018-11-1009-A-1 (Application number on approval letter)   |
| 26 Sep 2019 ( RGO approval )               | 2019/STE16409 (Site Specific Assesment Reference)          |
| 30-Oct-19                                  | S19/073/47302 (Application number on approval letter)      |
| 10-Jan-19                                  | 2018/03OCT/367 - B403201837697                             |
| 12-Nov-18                                  | NA                                                         |
| 12-Aug-19                                  | NA                                                         |
| 31-Mar-19                                  | NA                                                         |
| 31-Mar-19                                  | NA                                                         |
| 31-Mar-19                                  | NA                                                         |
| 27-May-19                                  | NA                                                         |
| 13-Aug-18                                  | CIRB Work Order # 3-1104763-1                              |
| 23-Sep-18                                  | CIRB Work Order # 3-1113472-1                              |
| 06-Feb-19                                  | Ethic ID: HREBA.CHC-19-0004                                |
| 14-Nov-18                                  | Ethic ID: HREBA.CHC-18-0027                                |
| 23-Oct-18                                  | CIRB Work Order # 3-1123222-1                              |
| 12 April 2019                              | NA                                                         |
| 11-Sep-19                                  | REB19-0853                                                 |
| 22-Nov-18                                  | NA                                                         |
| 21-Nov-18                                  | NA                                                         |
| 06-Dec-18                                  | NA                                                         |
| 16-Apr-19                                  | NA                                                         |
| 12-Dec-18                                  | NTS 18.10.01.67707 / RCB 2018-A02560-47                    |
| 12-Dec-18                                  | NTS 18.10.01.67707 / RCB 2018-A02560-48                    |
| 12-Dec-18                                  | NTS 18.10.01.67707 / RCB 2018-A02560-49                    |
| 12-Dec-18                                  | NTS 18.10.01.67707 / RCB 2018-A02560-50                    |
| 12-Dec-18                                  | NTS 18.10.01.67707 / RCB 2018-A02560-51                    |
| 12-Dec-18                                  | NTS 18.10.01.67707 / RCB 2018-A02560-52                    |
| 12-Dec-18                                  | NTS 18.10.01.67707 / RCB 2018-A02560-53                    |
| 12-Dec-18                                  | NTS 18.10.01.67707 / RCB 2018-A02560-54                    |
| 26-Feb-19                                  | NTS 18.10.01.67707 / RCB 2018-A02560-55                    |
| 13-Dec-18                                  | 3160 / 13-12-2018                                          |
| 22-Feb-19                                  | 197 / 27-02-2019                                           |
| 10-Apr-19                                  | E.Σ. 125/12.04.2019                                        |
| 10-Apr-19                                  | 15107/17.04.2019                                           |

|    |             |                                     |
|----|-------------|-------------------------------------|
| 1  |             |                                     |
| 2  | 10-Dec-18   | 5554-18-SMC                         |
| 3  | 20-Dec-18   | 0168-18-KMC                         |
| 4  | 24-Jan-19   | 0332-18-SOR                         |
| 5  | 11-Feb-19   | 5554-18-SMC                         |
| 6  | 13-Mar-19   | 0282-18-MMC                         |
| 7  | 18-Jun-19   | NA                                  |
| 8  | 06-Feb-19   | 568/2018/Oss/AOUBo                  |
| 9  | 09-Apr-19   | Protocollo n. 0066421               |
| 10 | 13-Mar-19   | N Prot. 148 del 20/03/2019          |
| 11 | 25-Jun-19   | NA                                  |
| 12 | 21-Mar-19   | Prot. N. 15862/19/ON del 21/03/2019 |
| 13 | 24-Apr-19   | n. 70/2019/PO                       |
| 14 | 09-Oct-19   | NA                                  |
| 15 | 28-Feb-18   | NA                                  |
| 16 | 05-Dec-18   | E - 1456                            |
| 17 | 28-Dec-18   | NA                                  |
| 18 | 15-Feb-19   | NA                                  |
| 19 | 05-Mar-19   | NA                                  |
| 20 | 09-Jan-19   | NA                                  |
| 21 | 21-Nov-2019 | NA                                  |
| 22 | 4-Sep-19    | NA                                  |
| 23 | 11-Oct-2019 | NA                                  |
| 24 | 11-Feb-19   | NA                                  |
| 25 | 03-Apr-19   | NA                                  |
| 26 | 14-Feb-19   | NA                                  |
| 27 | 11-Jan-19   | NA                                  |
| 28 | 04-Apr-19   | NA                                  |
| 29 | 06-Feb-19   | NA                                  |
| 30 | 08-Oct-18   | RTPO 1048                           |
| 31 | 08-Oct-18   | RTPO 1048                           |
| 32 | 08-Oct-18   | RTPO 1048                           |
| 33 | 08-Oct-18   | RTPO 1048                           |
| 34 | 08-Oct-18   | RTPO 1048                           |
| 35 | 11-Apr-19   | 2019/286/REK sør-øst C              |
| 36 | 11-Apr-19   | 2019/286/REK sør-øst C              |
| 37 | 21-Nov-18   | 396/18                              |
| 38 | 22-Apr-19   | 166/CEC/SV                          |
| 39 | 21-Feb-19   | 689/2019                            |
| 40 | 14-Nov-19   | 18/291 (OBS)                        |
| 41 | 14-Nov-18   | 18/291 (OBS)                        |
| 42 | 27-Feb-19   | Acta 04/2019, de 18 de febrero      |
| 43 | 20-Dec-18   | PI-3485                             |
| 44 | 12-Nov-18   | EPA-17-18                           |
| 45 | 20-May-19   | MV/JMR/mm/59/19                     |
| 46 | 05-Feb-19   | NA                                  |
| 47 | 19-Feb-19   | Nº Registro: SAL2019065050          |
| 48 |             |                                     |
| 49 |             |                                     |
| 50 |             |                                     |
| 51 |             |                                     |
| 52 |             |                                     |
| 53 |             |                                     |
| 54 |             |                                     |
| 55 |             |                                     |
| 56 |             |                                     |
| 57 |             |                                     |
| 58 |             |                                     |
| 59 |             |                                     |
| 60 |             |                                     |

|           |                                     |
|-----------|-------------------------------------|
| 04-Apr-19 | N/A                                 |
| 06-Aug-18 | CIRB Work Order # 9-1103383-1       |
| 07-Aug-18 | CIRB Work Order # 9-1102660-1       |
| 10-Oct-18 | CIRB Work Order # 1-1120280-1       |
| 17-Sep-18 | CIRB Work Order # 9-1113500-1       |
| 01-Oct-18 | N/A                                 |
| 22-Aug-18 | CIRB Work Order # 9-1106545-1       |
| 07-Aug-18 | CIRB Work Order # 9-1101413-1       |
| 20-Dec-18 | N/A                                 |
| 22-Apr-19 | N/A                                 |
| 02-Nov-18 | CIRB Work Order # 1-1127356-1       |
| 20-Jan-19 | Study ID # 2018-8063                |
| 13-Aug-18 | CIRB Work Order # 9-1104100-1       |
| 25-Sep-18 | CIRB Work Order # 9-1107157-1       |
| 30-Aug-18 | CIRB Work Order # 9-1108597-1       |
| 25-Sep-18 | CIRB Work Order # 9-1112966-1       |
| 03-Dec-18 | CIRB Work Order # 1-1134628-1       |
| 06-Nov-18 | CIRB Work Order # 1-1128664-1       |
| 25-Sep-18 | CIRB Work Order # 9-1110005-1       |
| 18-Oct-18 | CIRB Work Order # 1-1121544-1       |
| 10-Oct-18 | CIRB Work Order # 1-1117103-1       |
| 06-Nov-18 | CIRB Work Order # 1-1128191-1       |
| 16-Jan-19 | CIRB Work Order # 1-1132624-1       |
| 12-Nov-18 | CIRB Work Order # 11-1129449-1      |
| 26-Dec-18 | CIRB Work Order # 1-1140132-1       |
| 30-Nov-18 | CIRB Work Order # 1-1134653-1       |
| 05-Jun-19 | WIRB Work Order Number: 1-1189465-1 |
| 07-Jun-19 | WIRB Work Order Number: 1-1189469-1 |
| 10-May-19 | WIRB Work Order Number: 1-1182517-1 |
| 19-Jun-19 | WIRB Work Order Number: 1-1194679-1 |
| 11-Jul-19 | WIRB Work Order Number: 1-1200720-1 |
| 31-Aug-19 | WIRB Work Order Number: 1-1215428-1 |

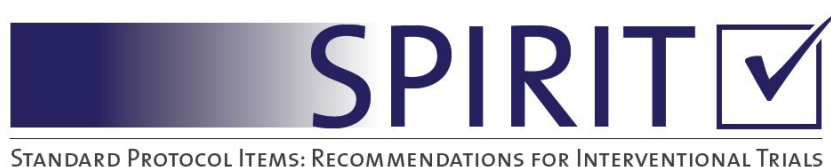

SPIRIT 2013 Checklist: Recommended items to address in a clinical trial protocol and related documents\*

| Section/item                      | ItemNo | Description                                                                                                                                                                                                                                                                              | Page    |
|-----------------------------------|--------|------------------------------------------------------------------------------------------------------------------------------------------------------------------------------------------------------------------------------------------------------------------------------------------|---------|
| <b>Administrative information</b> |        |                                                                                                                                                                                                                                                                                          |         |
| Title                             | 1      | Descriptive title identifying the study design, population, interventions, and, if applicable, trial acronym                                                                                                                                                                             | 1       |
| Trial registration                | 2a     | Trial identifier and registry name. If not yet registered, name of intended registry                                                                                                                                                                                                     | 2, 3, 6 |
|                                   | 2b     | All items from the World Health Organization Trial Registration Data Set                                                                                                                                                                                                                 |         |
| Protocol version                  | 3      | Date and version identifier                                                                                                                                                                                                                                                              | 6       |
| Funding                           | 4      | Sources and types of financial, material, and other support                                                                                                                                                                                                                              | 14–15   |
| Roles and responsibilities        | 5a     | Names, affiliations, and roles of protocol contributors                                                                                                                                                                                                                                  | 1, 15   |
|                                   | 5b     | Name and contact information for the trial sponsor                                                                                                                                                                                                                                       | 1, 14   |
|                                   | 5c     | Role of study sponsor and funders, if any, in study design; collection, management, analysis, and interpretation of data; writing of the report; and the decision to submit the report for publication, including whether they will have ultimate authority over any of these activities | 14–15   |
|                                   | 5d     | Composition, roles, and responsibilities of the coordinating centre, steering committee, endpoint adjudication committee, data management team, and other individuals or groups overseeing the trial, if applicable (see Item 21a for data monitoring committee)                         | 10, 15  |
| <b>Introduction</b>               |        |                                                                                                                                                                                                                                                                                          |         |
| Background and rationale          | 6a     | Description of research question and justification for undertaking the trial, including summary of relevant studies (published and unpublished) examining benefits and harms for each intervention                                                                                       | 5–6     |
|                                   | 6b     | Explanation for choice of comparators                                                                                                                                                                                                                                                    | N/A     |



|    |                                                           |     |                                                            |               |
|----|-----------------------------------------------------------|-----|------------------------------------------------------------|---------------|
| 1  |                                                           |     |                                                            |               |
| 2  | Objectives                                                | 7   | Specific objectives or hypotheses                          | 5–6           |
| 3  |                                                           |     |                                                            |               |
| 4  | Trial design                                              | 8   | Description of trial design including type of trial (eg,   | 6             |
| 5  |                                                           |     | parallel group, crossover, factorial, single group),       |               |
| 6  |                                                           |     | allocation ratio, and framework (eg, superiority,          |               |
| 7  |                                                           |     | equivalence, noninferiority, exploratory)                  |               |
| 8  |                                                           |     |                                                            |               |
| 9  |                                                           |     |                                                            |               |
| 10 | <b>Methods: Participants, interventions, and outcomes</b> |     |                                                            |               |
| 11 |                                                           |     |                                                            |               |
| 12 | Study setting                                             | 9   | Description of study settings (eg, community clinic,       | 6, figure 1   |
| 13 |                                                           |     | academic hospital) and list of countries where data will   |               |
| 14 |                                                           |     | be collected. Reference to where list of study sites can   |               |
| 15 |                                                           |     | be obtained                                                |               |
| 16 |                                                           |     |                                                            |               |
| 17 | Eligibility criteria                                      | 10  | Inclusion and exclusion criteria for participants. If      | 6–7, table 1  |
| 18 |                                                           |     | applicable, eligibility criteria for study centres and     |               |
| 19 |                                                           |     | individuals who will perform the interventions (eg,        |               |
| 20 |                                                           |     | surgeons, psychotherapists)                                |               |
| 21 |                                                           |     |                                                            |               |
| 22 |                                                           |     |                                                            |               |
| 23 | Interventions                                             | 11a | Interventions for each group with sufficient detail to     | N/A,          |
| 24 |                                                           |     | allow replication, including how and when they will be     | observational |
| 25 |                                                           |     | administered                                               |               |
| 26 |                                                           |     |                                                            |               |
| 27 |                                                           |     |                                                            |               |
| 28 |                                                           | 11b | Criteria for discontinuing or modifying allocated          | 6             |
| 29 |                                                           |     | interventions for a given trial participant (eg, drug dose |               |
| 30 |                                                           |     | change in response to harms, participant request, or       |               |
| 31 |                                                           |     | improving/worsening disease)                               |               |
| 32 |                                                           |     |                                                            |               |
| 33 |                                                           |     |                                                            |               |
| 34 |                                                           | 11c | Strategies to improve adherence to intervention            | N/A,          |
| 35 |                                                           |     | protocols, and any procedures for monitoring               | observational |
| 36 |                                                           |     | adherence (eg, drug tablet return, laboratory tests)       |               |
| 37 |                                                           |     |                                                            |               |
| 38 |                                                           | 11d | Relevant concomitant care and interventions that are       | N/A,          |
| 39 |                                                           |     | permitted or prohibited during the trial                   | observational |
| 40 |                                                           |     |                                                            |               |
| 41 | Outcomes                                                  | 12  | Primary, secondary, and other outcomes, including the      | Page 8-9,     |
| 42 |                                                           |     | specific measurement variable (eg, systolic blood          | table 2       |
| 43 |                                                           |     | pressure), analysis metric (eg, change from baseline,      |               |
| 44 |                                                           |     | final value, time to event), method of aggregation (eg,    |               |
| 45 |                                                           |     | median, proportion), and time point for each outcome.      |               |
| 46 |                                                           |     | Explanation of the clinical relevance of chosen efficacy   |               |
| 47 |                                                           |     | and harm outcomes is strongly recommended                  |               |
| 48 |                                                           |     |                                                            |               |
| 49 |                                                           |     |                                                            |               |
| 50 | Participant                                               | 13  | Time schedule of enrolment, interventions (including       | 8, figure 2   |
| 51 | timeline                                                  |     | any run-ins and washouts), assessments, and visits for     |               |
| 52 |                                                           |     | participants. A schematic diagram is highly                |               |
| 53 |                                                           |     | recommended (see Figure)                                   |               |
| 54 |                                                           |     |                                                            |               |
| 55 |                                                           |     |                                                            |               |
| 56 |                                                           |     |                                                            |               |
| 57 |                                                           |     |                                                            |               |
| 58 |                                                           |     |                                                            |               |
| 59 |                                                           |     |                                                            |               |
| 60 |                                                           |     |                                                            |               |

|   |             |    |                                                         |              |
|---|-------------|----|---------------------------------------------------------|--------------|
| 1 |             |    |                                                         |              |
| 2 | Sample size | 14 | Estimated number of participants needed to achieve      | 10–11, table |
| 3 |             |    | study objectives and how it was determined, including   | 3            |
| 4 |             |    | clinical and statistical assumptions supporting any     |              |
| 5 |             |    | sample size calculations                                |              |
| 6 |             |    |                                                         |              |
| 7 | Recruitment | 15 | Strategies for achieving adequate participant enrolment | N/A          |
| 8 |             |    | to reach target sample size                             |              |
| 9 |             |    |                                                         |              |

### Methods: Assignment of interventions (for controlled trials)

#### Allocation:

|    |                |     |                                                           |               |
|----|----------------|-----|-----------------------------------------------------------|---------------|
| 14 | Sequence       | 16a | Method of generating the allocation sequence (eg,         | N/A,          |
| 15 | generation     |     | computer-generated random numbers), and list of any       | observational |
| 16 |                |     | factors for stratification. To reduce predictability of a |               |
| 17 |                |     | random sequence, details of any planned restriction       |               |
| 18 |                |     | (eg, blocking) should be provided in a separate           |               |
| 19 |                |     | document that is unavailable to those who enrol           |               |
| 20 |                |     | participants or assign interventions                      |               |
| 21 |                |     |                                                           |               |
| 22 |                |     |                                                           |               |
| 23 |                |     |                                                           |               |
| 24 | Allocation     | 16b | Mechanism of implementing the allocation sequence         | N/A,          |
| 25 | concealment    |     | (eg, central telephone; sequentially numbered, opaque,    | observational |
| 26 | mechanism      |     | sealed envelopes), describing any steps to conceal the    |               |
| 27 |                |     | sequence until interventions are assigned                 |               |
| 28 |                |     |                                                           |               |
| 29 |                |     |                                                           |               |
| 30 | Implementation | 16c | Who will generate the allocation sequence, who will       | N/A,          |
| 31 |                |     | enrol participants, and who will assign participants to   | observational |
| 32 |                |     | interventions                                             |               |
| 33 |                |     |                                                           |               |
| 34 | Blinding       | 17a | Who will be blinded after assignment to interventions     | N/A,          |
| 35 | (masking)      |     | (eg, trial participants, care providers, outcome          | observational |
| 36 |                |     | assessors, data analysts), and how                        |               |
| 37 |                |     |                                                           |               |
| 38 |                |     |                                                           |               |
| 39 |                | 17b | If blinded, circumstances under which unblinding is       | N/A,          |
| 40 |                |     | permissible, and procedure for revealing a participant's  | observational |
| 41 |                |     | allocated intervention during the trial                   |               |
| 42 |                |     |                                                           |               |

### Methods: Data collection, management, and analysis

|    |                 |     |                                                             |       |
|----|-----------------|-----|-------------------------------------------------------------|-------|
| 45 | Data collection | 18a | Plans for assessment and collection of outcome,             | 8, 10 |
| 46 | methods         |     | baseline, and other trial data, including any related       |       |
| 47 |                 |     | processes to promote data quality (eg, duplicate            |       |
| 48 |                 |     | measurements, training of assessors) and a description      |       |
| 49 |                 |     | of study instruments (eg, questionnaires, laboratory        |       |
| 50 |                 |     | tests) along with their reliability and validity, if known. |       |
| 51 |                 |     | Reference to where data collection forms can be found,      |       |
| 52 |                 |     | if not in the protocol                                      |       |
| 53 |                 |     |                                                             |       |
| 54 |                 |     |                                                             |       |
| 55 |                 |     |                                                             |       |
| 56 |                 | 18b | Plans to promote participant retention and complete         | N/A   |
| 57 |                 |     | follow-up, including list of any outcome data to be         |       |
| 58 |                 |     | collected for participants who discontinue or deviate       |       |
| 59 |                 |     | from intervention protocols                                 |       |
| 60 |                 |     |                                                             |       |

|    |                                 |     |                                                              |               |
|----|---------------------------------|-----|--------------------------------------------------------------|---------------|
| 1  |                                 |     |                                                              |               |
| 2  | Data                            | 19  | Plans for data entry, coding, security, and storage,         | N/A           |
| 3  | management                      |     | including any related processes to promote data quality      |               |
| 4  |                                 |     | (eg, double data entry; range checks for data values).       |               |
| 5  |                                 |     | Reference to where details of data management                |               |
| 6  |                                 |     | procedures can be found, if not in the protocol              |               |
| 7  |                                 |     |                                                              |               |
| 8  | Statistical                     | 20a | Statistical methods for analysing primary and                | 10            |
| 9  | methods                         |     | secondary outcomes. Reference to where other details         |               |
| 10 |                                 |     | of the statistical analysis plan can be found, if not in the |               |
| 11 |                                 |     | protocol                                                     |               |
| 12 |                                 |     |                                                              |               |
| 13 |                                 |     |                                                              |               |
| 14 |                                 | 20b | Methods for any additional analyses (eg, subgroup and        | N/A           |
| 15 |                                 |     | adjusted analyses)                                           |               |
| 16 |                                 |     |                                                              |               |
| 17 |                                 | 20c | Definition of analysis population relating to protocol       | N/A,          |
| 18 |                                 |     | non-adherence (eg, as randomised analysis), and any          | observational |
| 19 |                                 |     | statistical methods to handle missing data (eg, multiple     |               |
| 20 |                                 |     | imputation)                                                  |               |
| 21 |                                 |     |                                                              |               |
| 22 |                                 |     |                                                              |               |
| 23 | <b>Methods: Monitoring</b>      |     |                                                              |               |
| 24 |                                 |     |                                                              |               |
| 25 | Data monitoring                 | 21a | Composition of data monitoring committee (DMC);              | N/A           |
| 26 |                                 |     | summary of its role and reporting structure; statement       |               |
| 27 |                                 |     | of whether it is independent from the sponsor and            |               |
| 28 |                                 |     | competing interests; and reference to where further          |               |
| 29 |                                 |     | details about its charter can be found, if not in the        |               |
| 30 |                                 |     | protocol. Alternatively, an explanation of why a DMC is      |               |
| 31 |                                 |     | not needed                                                   |               |
| 32 |                                 |     |                                                              |               |
| 33 |                                 |     |                                                              |               |
| 34 |                                 | 21b | Description of any interim analyses and stopping             | N/A,          |
| 35 |                                 |     | guidelines, including who will have access to these          | observational |
| 36 |                                 |     | interim results and make the final decision to terminate     |               |
| 37 |                                 |     | the trial                                                    |               |
| 38 |                                 |     |                                                              |               |
| 39 |                                 |     |                                                              |               |
| 40 | Harms                           | 22  | Plans for collecting, assessing, reporting, and              | N/A,          |
| 41 |                                 |     | managing solicited and spontaneously reported                | observational |
| 42 |                                 |     | adverse events and other unintended effects of trial         |               |
| 43 |                                 |     | interventions or trial conduct                               |               |
| 44 |                                 |     |                                                              |               |
| 45 |                                 |     |                                                              |               |
| 46 | Auditing                        | 23  | Frequency and procedures for auditing trial conduct, if      | N/A           |
| 47 |                                 |     | any, and whether the process will be independent from        |               |
| 48 |                                 |     | investigators and the sponsor                                |               |
| 49 |                                 |     |                                                              |               |
| 50 |                                 |     |                                                              |               |
| 51 | <b>Ethics and dissemination</b> |     |                                                              |               |
| 52 |                                 |     |                                                              |               |
| 53 | Research ethics                 | 24  | Plans for seeking research ethics                            | 7             |
| 54 | approval                        |     | committee/institutional review board (REC/IRB)               |               |
| 55 |                                 |     | approval                                                     |               |
| 56 |                                 |     |                                                              |               |
| 57 |                                 |     |                                                              |               |
| 58 |                                 |     |                                                              |               |
| 59 |                                 |     |                                                              |               |
| 60 |                                 |     |                                                              |               |

|    |                   |     |                                                            |               |
|----|-------------------|-----|------------------------------------------------------------|---------------|
| 1  |                   |     |                                                            |               |
| 2  | Protocol          | 25  | Plans for communicating important protocol                 | N/A           |
| 3  | amendments        |     | modifications (eg, changes to eligibility criteria,        |               |
| 4  |                   |     | outcomes, analyses) to relevant parties (eg,               |               |
| 5  |                   |     | investigators, REC/IRBs, trial participants, trial         |               |
| 6  |                   |     | registries, journals, regulators)                          |               |
| 7  |                   |     |                                                            |               |
| 8  | Consent or assent | 26a | Who will obtain informed consent or assent from            | N/A           |
| 9  |                   |     | potential trial participants or authorised surrogates, and |               |
| 10 |                   |     | how (see Item 32)                                          |               |
| 11 |                   |     |                                                            |               |
| 12 |                   |     |                                                            |               |
| 13 |                   | 26b | Additional consent provisions for collection and use of    | N/A           |
| 14 |                   |     | participant data and biological specimens in ancillary     |               |
| 15 |                   |     | studies, if applicable                                     |               |
| 16 |                   |     |                                                            |               |
| 17 | Confidentiality   | 27  | How personal information about potential and enrolled      | N/A           |
| 18 |                   |     | participants will be collected, shared, and maintained in  |               |
| 19 |                   |     | order to protect confidentiality before, during, and after |               |
| 20 |                   |     | the trial                                                  |               |
| 21 |                   |     |                                                            |               |
| 22 |                   |     |                                                            |               |
| 23 | Declaration of    | 28  | Financial and other competing interests for principal      | 14–15         |
| 24 | interests         |     | investigators for the overall trial and each study site    |               |
| 25 |                   |     |                                                            |               |
| 26 | Access to data    | 29  | Statement of who will have access to the final trial       | N/A           |
| 27 |                   |     | dataset, and disclosure of contractual agreements that     |               |
| 28 |                   |     | limit such access for investigators                        |               |
| 29 |                   |     |                                                            |               |
| 30 |                   |     |                                                            |               |
| 31 | Ancillary and     | 30  | Provisions, if any, for ancillary and post-trial care, and | N/A,          |
| 32 | post-trial care   |     | for compensation to those who suffer harm from trial       | observational |
| 33 |                   |     | participation                                              |               |
| 34 |                   |     |                                                            |               |
| 35 | Dissemination     | 31a | Plans for investigators and sponsor to communicate         | 10            |
| 36 | policy            |     | trial results to participants, healthcare professionals,   |               |
| 37 |                   |     | the public, and other relevant groups (eg, via             |               |
| 38 |                   |     | publication, reporting in results databases, or other      |               |
| 39 |                   |     | data sharing arrangements), including any publication      |               |
| 40 |                   |     | restrictions                                               |               |
| 41 |                   |     |                                                            |               |
| 42 |                   |     |                                                            |               |
| 43 |                   |     |                                                            |               |
| 44 |                   | 31b | Authorship eligibility guidelines and any intended use of  |               |
| 45 |                   |     | professional writers                                       |               |
| 46 |                   |     |                                                            |               |
| 47 |                   | 31c | Plans, if any, for granting public access to the full      | N/A           |
| 48 |                   |     | protocol, participant-level dataset, and statistical code  |               |
| 49 |                   |     |                                                            |               |
| 50 | <b>Appendices</b> |     |                                                            |               |
| 51 |                   |     |                                                            |               |
| 52 | Informed consent  | 32  | Model consent form and other related documentation         | N/A           |
| 53 | materials         |     | given to participants and authorised surrogates            |               |
| 54 |                   |     |                                                            |               |
| 55 | Biological        | 33  | Plans for collection, laboratory evaluation, and storage   | N/A           |
| 56 | specimens         |     | of biological specimens for genetic or molecular           |               |
| 57 |                   |     | analysis in the current trial and for future use in        |               |
| 58 |                   |     | ancillary studies, if applicable                           |               |
| 59 |                   |     |                                                            |               |
| 60 |                   |     |                                                            |               |

1 \*It is strongly recommended that this checklist be read in conjunction with the SPIRIT 2013  
2 Explanation & Elaboration for important clarification on the items. Amendments to the  
3 protocol should be tracked and dated. The SPIRIT checklist is copyrighted by the SPIRIT  
4 Group under the Creative Commons "[Attribution-NonCommercial-NoDerivs 3.0 Unported](#)"  
5 license.  
6  
7  
8  
9  
10  
11  
12  
13  
14  
15  
16  
17  
18  
19  
20  
21  
22  
23  
24  
25  
26  
27  
28  
29  
30  
31  
32  
33  
34  
35  
36  
37  
38  
39  
40  
41  
42  
43  
44  
45  
46  
47  
48  
49  
50  
51  
52  
53  
54  
55  
56  
57  
58  
59  
60

For peer review only
